# Supplementary material for: 4-1BB co-stimulation further enhances anti-PD-1-mediated reinvigoration of exhausted CD39+ CD8 T cells from primary and metastatic sites of epithelial ovarian cancers
Source: PubMed Central journal article supplement — J Immunother Cancer. 2020 Dec 16;8(2):e001650. doi: 10.1136/jitc-2020-001650 (PMC7745695; doi:10.1136/jitc-2020-001650), 2020-12-16
Supplement: jitc-2020-001650supp002.pdf [file jitc-2020-001650supp002.pdf]

**Supplementary Table S1. Information about antibodies and multimers used in flow cytometry staining**

| <b>ANTIBODIES</b>   |                                                |                        |                        |                |                         |
|---------------------|------------------------------------------------|------------------------|------------------------|----------------|-------------------------|
| <b>Fluorochrome</b> | <b>Antigen</b>                                 | <b>Reactivity/Host</b> | <b>Clone</b>           | <b>Source</b>  | <b>Identifier(Cat#)</b> |
| Unconjugated        | Tcf-1                                          | Human/Rabbit           | C63D9                  | Cell signaling | 2203S                   |
| BV421               | OX40                                           | Human/Mouse            | Ber-ACT35              | Biologend      | 350014                  |
| BV421               | IFN- $\gamma$                                  | Human/Mouse            | B27                    | BD Biosciences | 562988                  |
| BV421               | CD39                                           | Human/Mouse            | Tu66                   | BD Biosciences | 563679                  |
| BV421               | Rabbit IgG                                     | Rabbit/Donkey          | Poly4064               | Biologend      | 406410                  |
| BV421               | PD-1                                           | Human/Mouse            | EH12.2H7               | Biologend      | 329910                  |
| BV510               | CD3                                            | Human/Mouse            | OKT3                   | Biologend      | 317332                  |
| BV510               | CD3                                            | Human/Mouse            | HIT3a                  | BD Biosciences | 564713                  |
| BV605               | PD-1                                           | Human/Mouse            | EH12.2H7               | Biologend      | 329924                  |
| BV605               | Ki-67                                          | Human/Mouse            | Ki-67                  | Biologend      | 350522                  |
| BV605               | Tim-3                                          | Human/Mouse            | F38-2E2                | Biologend      | 345018                  |
| BV650               | CD39                                           | Human/Mouse            | Tu66                   | BD Biosciences | 563681                  |
| BV650               | 4-1BB                                          | Human/Mouse            | 4B4-1                  | BD Biosciences | 564092                  |
| BV650               | CD69                                           | Human/Mouse            | FN50                   | Biologend      | 310934                  |
| BV650               | PD-1                                           | Human/Mouse            | EH12.2H7               | Biologend      | 329950                  |
| BV711               | CD39                                           | Human/Mouse            | Tu66                   | BD Biosciences | 563680                  |
| BV711               | CD8                                            | Human/Mouse            | RPA-T8                 | BD Biosciences | 563677                  |
| BB515               | CD103                                          | Human/Mouse            | Ber-ACT8               | BD Biosciences | 564578                  |
| FITC                | CD3                                            | Human/Mouse            | HIT3a                  | BD Biosciences | 555339                  |
| FITC                | CD30                                           | Human/Mouse            | Ber-H8                 | BD Biosciences | 555829                  |
| FITC                | Eomes                                          | Human/Mouse            | WD1928                 | eBiosciences   | 11-4877-42              |
| FITC                | Ki-67                                          | Human/Mouse            | 11F6                   | BD Biosciences | 151212                  |
| FITC                | CD8                                            | Human/Mouse            | RPA-T8                 | BD Biosciences | 561948                  |
| BB700               | CD40L                                          | Human/Mouse            | TRAP-1                 | BD Biosciences | 745814                  |
| PerCP-Cy5.5         | 7-AAD                                          | Human/Mouse            | 7-AAD                  | BD Biosciences | 51-68981E               |
| PE                  | T-bet                                          | Human/Mouse            | 4B10                   | eBiosciences   | 12-5825-82              |
| PE                  | GITR                                           | Human/Mouse            | 621                    | Biologend      | 311604                  |
| PE                  | Tim-3                                          | Human/Mouse            | MBSA43                 | Biologend      | 12-9500-42              |
| PE                  | PD-1                                           | Human/Mouse            | EH12.2H7               | Biologend      | 329905                  |
| PE                  | 4-1BB                                          | Human/Mouse            | 4B4-1                  | BD Biosciences | 309804                  |
| PE-TR               | LIVE/DEAD™ fixable red dead cell stain kit     |                        |                        | Invitrogen     | L34972                  |
| PE-TR               | CD14                                           | Human/Mouse            | MOP9                   | BD Biosciences | 562335                  |
| PE-TR               | CD19                                           | Human/Mouse            | HIB19                  | BD Biosciences | 562294                  |
| PE-Cy7              | Eomes                                          | Human/Mouse            | WD1928                 | eBiosciences   | 25-4877-42              |
| PE-Cy7              | CD8                                            | Human/Mouse            | RPA-T8                 | BD Biosciences | 557746                  |
| PE-Cy7              | CD69                                           | Human/Mouse            | FN50                   | BD Biosciences | 310912                  |
| PE-Cy7              | CTLA-4                                         | Human/Mouse            | L3D10                  | Biologend      | 349914                  |
| PE-Cy7              | T-bet                                          | Human/Mouse            | 4B10                   | eBiosciences   | 644824                  |
| PE-Cy7              | CD38                                           | Human/Mouse            | HIT2                   | BD Biosciences | 560677                  |
| APC                 | 4-1BB                                          | Human/Mouse            | 4B4-1                  | BD Biosciences | 550890                  |
| APC                 | TNF- $\alpha$                                  | Human/Mouse            | MP6-XT22               | eBiosciences   | 17-7321-82              |
| AF700               | CD8                                            | Human/Mouse            | RPA-T8                 | BD Biosciences | 561453                  |
| AF700               | CD38                                           | Human/Mouse            | HIT2                   | BD Biosciences | 560676                  |
| APC-H7              | LIVE/DEAD™ fixable near-ir dead cell stain kit |                        |                        | Invitrogen     | L34976                  |
| APC-H7              | CD14                                           | Human/Mouse            | MOP9                   | BD Biosciences | 560180                  |
| APC-H7              | CD19                                           | Human/Mouse            | SJ25C1                 | BD Biosciences | 560177                  |
| APC-H7              | CD39                                           | Human/Mouse            | A1                     | Biologend      | 328226                  |
| APC-H7              | HLA-DR                                         | Human/Mouse            | LN3                    | eBiosciences   | 47-9956-42              |
| APC-H7              | CD8                                            | Human/Mouse            | SK1                    | BD Biosciences | 557834                  |
| <b>Multimers</b>    |                                                |                        |                        |                |                         |
| <b>Fluorochrome</b> | <b>HLA</b>                                     | <b>Reactivity</b>      | <b>Peptide/Antigen</b> | <b>Source</b>  | <b>Identifier(Cat#)</b> |
| PE                  | HLA-A*0201                                     | Human                  | SLLMWITQV / NY-ESO-1   | Immudex        | WB3247-PE-150           |
| PE                  | HLA-A*0201                                     | Human                  | KVAELVHFL / MAGE-A3    | Immudex        | WB3497-PE-150           |
| APC                 | HLA-A*0201                                     | Human                  | NLVPMTATV / HCMVpp65   | Proimmune      | F008-4B                 |
| APC                 | HLA-A*0201                                     | Human                  | CLGGLTMV / EBV LMP-2   | Proimmune      | F042-4B                 |
