# Supplementary material for: 4-1BB co-stimulation further enhances anti-PD-1-mediated reinvigoration of exhausted CD39+ CD8 T cells from primary and metastatic sites of epithelial ovarian cancers
Source: PubMed Central journal article supplement — J Immunother Cancer. 2020 Dec 16;8(2):e001650. doi: 10.1136/jitc-2020-001650 (PMC7745695; doi:10.1136/jitc-2020-001650), 2020-12-16
Supplement: jitc-2020-001650supp003.pdf [file jitc-2020-001650supp003.pdf]

Supplementary Table S2. Flow cytometry panels.

| Fluorochrome      | Violet Laser (405 nm) |               |       |       |       |       | Blue Laser (488nm) |             | Yellow-Green Laser (561nm) |               |        |        | Red Laser (640nm) |       |               |
|-------------------|-----------------------|---------------|-------|-------|-------|-------|--------------------|-------------|----------------------------|---------------|--------|--------|-------------------|-------|---------------|
|                   | BV421                 | BV510         | BV605 | BV650 | BV711 | BV786 | FITC               | PerCP-Cy5.5 | PE                         | PE-TR         | PE-Cy5 | PE-Cy7 | APC               | AF700 | APC-H7        |
| <b>Panel I</b>    | <b>Molecule</b>       | Tcf-1         | CD3   | PD-1  |       | CD39  | CD103              | Ki-67       | T-bet                      |               |        | Eomes  | 4-1BB             | CD8   | L/D/CD14/CD19 |
|                   | <b>Sources</b>        | CST           | BioL  | BioL  |       | BD    | BD                 | BioL        | eBio                       |               |        | eBio   | BD                | BD    | Invitro/BD/BD |
| <b>Panel II</b>   | <b>Molecule</b>       | Tcf-1         | CD3   | PD-1  | 4-1BB | CD39  | CD103              |             | Tim-3                      | L/D/CD14/CD19 |        | CTLA-4 |                   |       | CD8           |
|                   | <b>Sources</b>        | CST           | BD    | BioL  | BD    | BioL  | BD                 |             | BioL                       | Invitro/BD/BD |        | eBio   |                   |       | BD            |
| <b>Panel III</b>  | <b>Molecule</b>       | PD-1          | CD3   |       | CD39  | CD8   | Ki-67              |             | T-bet                      | L/D/CD14/CD19 |        | Eomes  | 4-1BB             | CD38  | HLA-DR        |
|                   | <b>Sources</b>        | BioL          | BD    |       | BD    | BD    | BD                 |             | eBio                       | Invitro/BD/BD |        | eBio   | BD                | BD    | eBio          |
| <b>Panel IV</b>   | <b>Molecule</b>       | Tcf-1         | CD3   | Tim-3 | PD-1  | CD39  | CD103              |             |                            | L/D/CD14/CD19 |        | CTLA-4 | 4-1BB             |       | CD8           |
|                   | <b>Sources</b>        | CST           | BD    | BioL  | BioL  | BioL  | BD                 |             |                            | Invitro/BD/BD |        | eBio   | BD                |       | BD            |
| <b>Panel V</b>    | <b>Molecule</b>       | PD-1          | CD3   |       | CD69  | CD8   | CD103              |             | Multimer                   | L/D/CD14/CD19 |        |        | Multimer          |       | CD39          |
|                   | <b>Sources</b>        | BioL          | BioL  |       | BioL  | BD    | BD                 |             | ID                         | Invitro/BD/BD |        |        | PI                |       | BioL          |
| <b>Panel VI</b>   | <b>Molecule</b>       | OX40          | CD3   | PD-1  |       |       | CD30               | CD40L       | GITR                       | L/D/CD14/CD19 |        | CD8    | 4-1BB             |       | CD39          |
|                   | <b>Sources</b>        | BioL          | BioL  | BioL  |       |       | BD                 | BD          | BioL                       | Invitro/BD/BD |        | BD     | BD                |       | BioL          |
| <b>Panel VII</b>  | <b>Molecule</b>       | CTV           |       |       |       |       | CD3                |             |                            | L/D/CD14/CD19 |        |        |                   | CD8   |               |
|                   | <b>Sources</b>        | Invitro       |       |       |       |       | BD                 |             |                            | Invitro/BD/BD |        |        |                   | BD    |               |
| <b>Panel VIII</b> | <b>Molecule</b>       | IFN- $\gamma$ |       |       |       |       | CD3                |             |                            | L/D/CD14/CD19 |        | CD8    | TNF- $\alpha$     |       |               |
|                   | <b>Sources</b>        | BD            |       |       |       |       | BD                 |             |                            | Invitro/BD/BD |        | BD     | eBio              |       |               |
| <b>Panel IX</b>   | <b>Molecule</b>       | PD-1          |       |       |       |       |                    | 7-AAD       | 4-1BB                      |               |        | CD8    |                   |       | CD39          |
|                   | <b>Sources</b>        | BioL          |       |       |       |       |                    | BD          | BD                         |               |        | BD     |                   |       | BioL          |
| <b>Panel X</b>    | <b>Molecule</b>       | PD-1          |       |       |       |       | CD8                | 7-AAD       |                            |               |        |        | 4-1BB             |       | CD39          |
|                   | <b>Sources</b>        | BioL          |       |       |       |       | BD                 | BD          |                            |               |        |        | BD                |       | BioL          |

CST; Cell Signaling Technology, BD; BD Biosciences, BioL; Biolegend, eBio; eBiosciences, Invitro; Invitrogen, ID; Immudex, PI; Proimmune, CTV; Cell Trace Violet.
