# Supplementary material for: 4-1BB co-stimulation further enhances anti-PD-1-mediated reinvigoration of exhausted CD39+ CD8 T cells from primary and metastatic sites of epithelial ovarian cancers
Source: PubMed Central journal article supplement — J Immunother Cancer. 2020 Dec 16;8(2):e001650. doi: 10.1136/jitc-2020-001650 (PMC7745695; doi:10.1136/jitc-2020-001650), 2020-12-16
Supplement: jitc-2020-001650supp004.pdf [file jitc-2020-001650supp004.pdf]

**Supplementary Table S3. The counts of cells obtained for RNA sequencing.**

|             | <b>Population 1</b><br>PD-1 <sup>+</sup> CD39 <sup>-</sup> CD8 TILs | <b>Population 2</b><br>4-1BB <sup>neg</sup> PD-1 <sup>high</sup> CD39 <sup>+</sup> CD8 TILs | <b>Population 3</b><br>4-1BB <sup>pos</sup> PD-1 <sup>high</sup> CD39 <sup>+</sup> CD8 TILs |
|-------------|---------------------------------------------------------------------|---------------------------------------------------------------------------------------------|---------------------------------------------------------------------------------------------|
| <b>Pt 1</b> | 63,292                                                              | 10,971                                                                                      | 13,117                                                                                      |
| <b>Pt 2</b> | 132,098                                                             | 16,071                                                                                      | 23,794                                                                                      |
| <b>Pt 3</b> | 28,495                                                              | 8,623                                                                                       | 9,073                                                                                       |

Cell counts are presented as numbers.
