# Supplementary material for: 4-1BB co-stimulation further enhances anti-PD-1-mediated reinvigoration of exhausted CD39+ CD8 T cells from primary and metastatic sites of epithelial ovarian cancers
Source: PubMed Central journal article supplement — J Immunother Cancer. 2020 Dec 16;8(2):e001650. doi: 10.1136/jitc-2020-001650 (PMC7745695; doi:10.1136/jitc-2020-001650), 2020-12-16
Supplement: jitc-2020-001650supp005.pdf [file jitc-2020-001650supp005.pdf]

**Supplementary Table S4. The frequency of multimer<sup>+</sup> cells in CD8 TILs**

|           |       | Frequency in CD8 TILs (%)   |                            |                             |                              |
|-----------|-------|-----------------------------|----------------------------|-----------------------------|------------------------------|
|           | Pt ID | NY-ESO-1 <sub>157-165</sub> | MAGE-A3 <sub>112-120</sub> | HCMVpp65 <sub>495-504</sub> | EBV LMP-2 <sub>426-434</sub> |
| <b>1</b>  | OT 1  | 1.34                        | 0                          | 0.42                        | 0                            |
| <b>2</b>  | OT 2  | 3.43                        | 0                          | 0                           | 0                            |
| <b>3</b>  | OT 3  | 1.02                        | 0                          | 0.96                        | 0                            |
| <b>4</b>  | OT 4  | 1.6                         | 1.08                       | 0.33                        | 0                            |
| <b>5</b>  | OT 5  | 0.77                        | 0.082                      | 0                           | 0                            |
| <b>6</b>  | OT 6  | 0                           | 0                          | 0                           | 0                            |
| <b>7</b>  | OT 7  | 0.73                        | 0.48                       | 0                           | 0                            |
| <b>8</b>  | OT 8  | 3.11                        | 1.52                       | 1.21                        | 0                            |
| <b>9</b>  | OT 9  | 0                           | 0                          | 0.29                        | 0                            |
| <b>10</b> | OT 10 | 1.26                        | 0.81                       | 0.08                        | 0                            |
| <b>11</b> | OT 11 | 0                           | 0                          | 1.12                        | 0                            |
| <b>12</b> | OT 12 | 0                           | 0                          | 0                           | 0                            |
| <b>13</b> | OT 13 | 0                           | 0                          | 0                           | 0                            |
| <b>14</b> | OT 14 | 0                           | 0                          | 0.13                        | 0.14                         |
| <b>15</b> | OT 15 | 3.66                        | 1.42                       | 0                           | 0                            |
| <b>16</b> | OT 16 | 0                           | 0                          | 0                           | 0                            |
| <b>17</b> | OT 17 | 0                           | 0                          | 1.88                        | 0.069                        |
| <b>18</b> | OT 18 | 0                           | 0                          | 0                           | 0                            |
| <b>19</b> | OT 19 | 0                           | 0                          | 5.18                        | 0                            |
| <b>20</b> | OT 20 | 0                           | 0                          | 0                           | 0                            |
| <b>21</b> | OT 21 | 0                           | 0                          | 1.91                        | 0.35                         |
| <b>22</b> | OT 22 | 0                           | 0                          | 0                           | 0                            |
| <b>23</b> | OT 23 | 1.44                        | 0.55                       | 0                           | 0                            |
| <b>24</b> | OT 24 | 0                           | 0                          | 0                           | 0                            |
| <b>25</b> | OT 25 | 0                           | 0                          | 0                           | 0                            |
| <b>26</b> | OT 26 | 0                           | 0                          | 1.55                        | 0                            |
