# Supplementary material for: 4-1BB co-stimulation further enhances anti-PD-1-mediated reinvigoration of exhausted CD39+ CD8 T cells from primary and metastatic sites of epithelial ovarian cancers
Source: PubMed Central journal article supplement — J Immunother Cancer. 2020 Dec 16;8(2):e001650. doi: 10.1136/jitc-2020-001650 (PMC7745695; doi:10.1136/jitc-2020-001650), 2020-12-16
Supplement: jitc-2020-001650supp006.pdf [file jitc-2020-001650supp006.pdf]

**Supplementary Table S5. Differentially expressed gene lists of PD-1<sup>high</sup> CD39<sup>+</sup> CD8 TILs according to 4-1BB expression compared to PD-1<sup>+</sup> CD39<sup>-</sup> CD8 TILs**

| Up- or down- regulated genes in PD-1 <sup>high</sup> CD39 <sup>+</sup> CD8 TILs compared to PD-1 <sup>+</sup> CD39 <sup>-</sup> CD8 TILs | Up- or down- regulated genes only in 4-1BB <sup>neg</sup> PD-1 <sup>high</sup> CD39 <sup>+</sup> CD8 TILs compared to PD-1 <sup>+</sup> CD39 <sup>-</sup> CD8 TILs | Up- or down- regulated genes only in 4-1BB <sup>pos</sup> PD-1 <sup>high</sup> CD39 <sup>+</sup> CD8 TILs compared to PD-1 <sup>+</sup> CD39 <sup>-</sup> CD8 TILs |
|------------------------------------------------------------------------------------------------------------------------------------------|--------------------------------------------------------------------------------------------------------------------------------------------------------------------|--------------------------------------------------------------------------------------------------------------------------------------------------------------------|
| IL7R                                                                                                                                     | KLRG1                                                                                                                                                              | TNFSF4                                                                                                                                                             |
| <b>ENTPDI</b>                                                                                                                            | DHRS3                                                                                                                                                              | LEF1                                                                                                                                                               |
| ITGA5                                                                                                                                    | MKI67                                                                                                                                                              | PZP                                                                                                                                                                |
| KLF3                                                                                                                                     | RYR2                                                                                                                                                               | SIK1B                                                                                                                                                              |
| ANK3                                                                                                                                     | LYST                                                                                                                                                               | PPP1R3B                                                                                                                                                            |
| ETV1                                                                                                                                     | ADAM28                                                                                                                                                             | H2AC13                                                                                                                                                             |
| CCR7                                                                                                                                     | GFOD1                                                                                                                                                              | RASGRP2                                                                                                                                                            |
| ITGAX                                                                                                                                    | MAST4                                                                                                                                                              | RAD51AP1                                                                                                                                                           |
| MYO1E                                                                                                                                    | CLCF1                                                                                                                                                              | NEBL                                                                                                                                                               |
| SIPR5                                                                                                                                    | VCL                                                                                                                                                                | MPP7                                                                                                                                                               |
| MS4A6A                                                                                                                                   | PHLDB1                                                                                                                                                             | GFPT2                                                                                                                                                              |
| TNF                                                                                                                                      | RPL3                                                                                                                                                               | SPRY4                                                                                                                                                              |
| VCAM1                                                                                                                                    | B4GALT5                                                                                                                                                            | TIPARP                                                                                                                                                             |
| TNS3                                                                                                                                     | PDCD1                                                                                                                                                              | POLQ                                                                                                                                                               |
| AKAP5                                                                                                                                    | IL6ST                                                                                                                                                              | LY9                                                                                                                                                                |
| PLXND1                                                                                                                                   | PLEKHA1                                                                                                                                                            | NEU1                                                                                                                                                               |
| DGKH                                                                                                                                     | SPRY2                                                                                                                                                              | PLEKHG3                                                                                                                                                            |
| IKZF4                                                                                                                                    | MTX3                                                                                                                                                               | PARK7                                                                                                                                                              |
| ATP8B4                                                                                                                                   | SYT11                                                                                                                                                              | PTGER4                                                                                                                                                             |
| SORL1                                                                                                                                    | RAB11FIP5                                                                                                                                                          | BRCA1                                                                                                                                                              |
| MAP4K3                                                                                                                                   | NCR1                                                                                                                                                               | CCR4                                                                                                                                                               |
| SIPR1                                                                                                                                    | PDE8A                                                                                                                                                              | IFIT2                                                                                                                                                              |
| EPHA4                                                                                                                                    | ARHGEF12                                                                                                                                                           | PAICS                                                                                                                                                              |
| PELI2                                                                                                                                    | LAT2                                                                                                                                                               | GPRASP1                                                                                                                                                            |
| TTN                                                                                                                                      | RPLP0                                                                                                                                                              | IL4I1                                                                                                                                                              |
| AUTS2                                                                                                                                    | RPS3                                                                                                                                                               | CDCA3                                                                                                                                                              |
| NHS                                                                                                                                      | LONRF2                                                                                                                                                             | CDC42EP3                                                                                                                                                           |
| SLCO3A1                                                                                                                                  | RRM2                                                                                                                                                               | ADAMTSL4                                                                                                                                                           |
| INPP5F                                                                                                                                   | ARHGAP31                                                                                                                                                           | ESCO2                                                                                                                                                              |
| ADRB2                                                                                                                                    | CSF1                                                                                                                                                               | WDHD1                                                                                                                                                              |
| GOLIM4                                                                                                                                   | CDK5RAP1                                                                                                                                                           | CD69                                                                                                                                                               |
| GLUL                                                                                                                                     | HJURP                                                                                                                                                              | SHC4                                                                                                                                                               |
| GNLY                                                                                                                                     | TTC9                                                                                                                                                               | HELLS                                                                                                                                                              |
| DPP4                                                                                                                                     | IL23A                                                                                                                                                              | PITPNC1                                                                                                                                                            |
| TOX                                                                                                                                      | ARHGEF9                                                                                                                                                            | EXO1                                                                                                                                                               |
| SLC4A4                                                                                                                                   | CKAP4                                                                                                                                                              | CARMIL3                                                                                                                                                            |
| NHSL2                                                                                                                                    | DZIP3                                                                                                                                                              | GINS1                                                                                                                                                              |
| FUT8                                                                                                                                     | UBASH3B                                                                                                                                                            | CDCA5                                                                                                                                                              |
| PDE7B                                                                                                                                    | SOGA1                                                                                                                                                              | CDC45                                                                                                                                                              |
| NR3C2                                                                                                                                    | TRIB1                                                                                                                                                              | KIF14                                                                                                                                                              |
| TRAF5                                                                                                                                    | LIMS1                                                                                                                                                              | PPP1R2C                                                                                                                                                            |
| TNFRSF9                                                                                                                                  | KLRC2                                                                                                                                                              | POLA1                                                                                                                                                              |
| CD80                                                                                                                                     | ATP10D                                                                                                                                                             | CDCA8                                                                                                                                                              |
| SETD7                                                                                                                                    | IER2                                                                                                                                                               | PATL2                                                                                                                                                              |
| CCDC141                                                                                                                                  | CD84                                                                                                                                                               | HSPA6                                                                                                                                                              |
| CYB561                                                                                                                                   | MPHOSPH9                                                                                                                                                           | CLSPN                                                                                                                                                              |
| KLRC1                                                                                                                                    | PTMS                                                                                                                                                               | SCML4                                                                                                                                                              |
| ZBTB10                                                                                                                                   | CCL3                                                                                                                                                               | CA5B                                                                                                                                                               |
| PIP5K1B                                                                                                                                  | WNT9A                                                                                                                                                              | CCNH                                                                                                                                                               |
| GEM                                                                                                                                      | IL18RAP                                                                                                                                                            | GGH                                                                                                                                                                |
| SARDH                                                                                                                                    | B3GNT7                                                                                                                                                             | C13orf46                                                                                                                                                           |
| SBF2                                                                                                                                     | IKZF3                                                                                                                                                              | ZMAT1                                                                                                                                                              |
| TCF7                                                                                                                                     | NECTIN1                                                                                                                                                            | H3C7                                                                                                                                                               |
| FOS                                                                                                                                      | PAG1                                                                                                                                                               | HECA                                                                                                                                                               |
| SLC4A10                                                                                                                                  | SLC35G2                                                                                                                                                            | PER1                                                                                                                                                               |
| P2RY1                                                                                                                                    | NFKBIA                                                                                                                                                             | WDR76                                                                                                                                                              |
| PLAUR                                                                                                                                    | KDM1A                                                                                                                                                              | H1-5                                                                                                                                                               |
| TSHZ2                                                                                                                                    | FAM102B                                                                                                                                                            | HMMR                                                                                                                                                               |
| GPR132                                                                                                                                   | CCRL2                                                                                                                                                              | PARP8                                                                                                                                                              |
| A2M                                                                                                                                      | ST8SIA1                                                                                                                                                            | NUF2                                                                                                                                                               |
| IL5RA                                                                                                                                    | RBPMS                                                                                                                                                              | UBE2T                                                                                                                                                              |
| USP53                                                                                                                                    | EEF1A1                                                                                                                                                             | PLAC8                                                                                                                                                              |
| LGR6                                                                                                                                     | TMEM123                                                                                                                                                            | NEK2                                                                                                                                                               |
| SNAP47                                                                                                                                   | PTGIS                                                                                                                                                              | SH2B3                                                                                                                                                              |
| P2RY8                                                                                                                                    | S100PBP                                                                                                                                                            | PLEKHA7                                                                                                                                                            |
| CLNK                                                                                                                                     | CRIM1                                                                                                                                                              | MGAT5                                                                                                                                                              |
| YBX3                                                                                                                                     | TP53INP1                                                                                                                                                           | DTL                                                                                                                                                                |
| CFH                                                                                                                                      | FEZ1                                                                                                                                                               | MYB                                                                                                                                                                |
| FRMD4B                                                                                                                                   | TSPAN5                                                                                                                                                             | STIL                                                                                                                                                               |
| ITGA2                                                                                                                                    | GOLGA6L10                                                                                                                                                          | MYBL2                                                                                                                                                              |
| AH1                                                                                                                                      | CAND2                                                                                                                                                              | GZMB                                                                                                                                                               |
| RBPJ                                                                                                                                     | PELI1                                                                                                                                                              | HSPA1B                                                                                                                                                             |
| KCNK5                                                                                                                                    | GOLGA6L9                                                                                                                                                           | TICRR                                                                                                                                                              |
| TPRG1                                                                                                                                    | UBE2C                                                                                                                                                              | AURKA                                                                                                                                                              |

|          |          |          |
|----------|----------|----------|
| MYC      | PTPRJ    | LHFPL6   |
| GADD45B  | LAG3     | NLRP3    |
| KLF2     | DENND3   | CDC25A   |
| SIRPG    | LPL      | CIP2A    |
| ATP9A    | MPST     | DNA2     |
| ITGA6    | ATP1B1   | CNR2     |
| BEND4    | CHST2    | TNFAIP3  |
| PHEX     | PTPRA    | FAM222A  |
| NABP1    | RGS2     | FAM111B  |
| CD200    | TJP3     | MBP      |
| SIPA1L2  | CCL23    | FABP5    |
| TMCC3    | RDH16    | H2AC11   |
| ERN1     | RPL13    | KIF20A   |
| PLCB1    | ASXL2    | MT-ND6   |
| RGS1     | NAV2     | SPON2    |
| BTBD19   | HLA-DMA  | CENPA    |
| RASGRF2  | SERPINB9 | FANCI    |
| TOX2     | MPP6     | BRIP1    |
| GNAO1    | CDKL5    | MARCKSL1 |
| PTGER2   | NPC1     | PLK4     |
| PXN      | TUBB4B   | DNAJB1   |
| CUX1     | FBXO2    | DUSP1    |
| LYAR     | RAB33B   | TTK      |
| TC2N     | EMP3     | FANCA    |
| MID2     | SLC25A4  | CCDC150  |
| CD200R1  | TWISTNB  | NCKAP5L  |
| PON2     | PLD1     | EPB41    |
| BCL9L    | SCRN1    | ZBED2    |
| FLT1     | VPS45    | SELPLG   |
| RASA3    | NOL4L    | PRDX3    |
| NR4A3    | PTPN6    | ATAD5    |
| GDPD5    | NAT9     | RDH10    |
| MGAT4A   | EML6     | STOM     |
| GPD2     | ANKRD33B | COL6A2   |
| SVIL     | LDOC1    | CENPI    |
| FAM3C    | DDX21    | MCM4     |
| ADGRG1   | PKIG     | MCM3     |
| DENND5A  | TLK1     | PFKFB3   |
| PERP     | NLGN2    | POLD3    |
| SPOCK2   | PHTF2    | KCNQ5    |
| KLF7     | ANKRD10  | CENPU    |
| ZC3H12C  | MT-ND3   | FAM177A1 |
| PLK3     | SLC16A1  | KIF4A    |
| ASPM     | OAS3     | RACGAP1  |
| TOB1     | NFE2L2   | CDC6     |
| GSTO2    | CPNE7    | C3AR1    |
| KNL1     |          | GPR155   |
| PTPRM    |          | KIF18A   |
| CD300A   |          | CXCL13   |
| TBC1D4   |          | LAIR1    |
| TP53I11  |          | CENPJ    |
| PRRG4    |          | KLF6     |
| CDK14    |          | ADCY3    |
| AGPAT4   |          | KLHDC7B  |
| TYROBP   |          | USP36    |
| CD109    |          | GAPDH    |
| UPP1     |          | ORC6     |
| AQP3     |          | NCR3     |
| GLDC     |          | SERPINB6 |
| FGR      |          | TK1      |
| IFNGR1   |          | POU6F1   |
| NRIP3    |          | FOXP1    |
| SC5D     |          | MX2      |
| SPEF2    |          | HSPA1A   |
| CRYBG1   |          | LRATD2   |
| SH3BGRL2 |          | CD6      |
| CLECL1   |          | DNAJA4   |
| GABBR1   |          | CLINT1   |
| AOAH     |          | GIMAP1   |
| FAM241A  |          | H2BC13   |
| NR5A2    |          | ABCA5    |
| SGPP2    |          | TAMALIN  |
| SLC39A10 |          | AMER1    |
| HAVCR1   |          | CDKN3    |
| SELL     |          | IL4      |
| GPR183   |          | RBBP8    |
| PIK3R1   |          | MMS22L   |
| DKK3     |          | MCM5     |
| TIMP1    |          | BTG1     |
| ITGAE    |          | GAB3     |
| LTB      |          | TTBK1    |
| APBA2    |          | RIMKLB   |
| BTNL8    |          | HOMER1   |
| TGFB1    |          | CCDC97   |
| MYO7A    |          | SNRK     |

|            |           |
|------------|-----------|
| NEO1       | FCMR      |
| SALL4      | E2F8      |
| LAIR2      | EMP1      |
| PLXDC1     | CIT       |
| MXI1       | H2BC9     |
| DSE        | TSC22D3   |
| CHN1       | TCF7L2    |
| CHD7       | ZWINT     |
| WIPF3      | ABHD6     |
| BCL6       | C9orf72   |
| C1orf162   | ASF1B     |
| SMIM3      | HIPK2     |
| NDFIP2     | MRPL51    |
| ETV3       | DHCR7     |
| TIGIT      | SLC12A7   |
| MS4A1      | EML4      |
| RASSF2     | TFDP1     |
| KIF11      | NR4A1     |
| FTH1       | CD70      |
| TIAM2      | IL15      |
| TRABD2A    | H3C3      |
| TLE4       | E2F2      |
| ARL3       | CCDC34    |
| PBX4       | GALNT2    |
| TMEM71     | SCCPDH    |
| TUBA4A     | RAB27B    |
| AHNAK      | PDGFA     |
| CENPF      | BRCA2     |
| CARD16     | CCNB1     |
| BTG2       | KIF18B    |
| TNRC6C     | PIF1      |
| SSBP2      | GRK3      |
| ZBTB18     | SAMHD1    |
| EGR3       | FANCD2    |
| NEIL3      | FNIP2     |
| MYO1D      | SYNGR1    |
| CTRC       | DDX11     |
| IGFBP3     | FOXM1     |
| ZNF282     | XXYL1     |
| ARL4C      | CENPH     |
| CAMK4      | PRDX5     |
| HECTD2     | H2BC11    |
| RNF130     | SKI       |
| RTL5       | PIM2      |
| CSGALNACT1 | TULP2     |
| SLC2A3     | CASS4     |
| SOD2       | TCF19     |
| TOP2A      | CENPW     |
| CCDC50     | RFC3      |
| CD44       | JMJD6     |
| TSC22D2    | PCNA      |
| TTYH2      | ZNF683    |
| PSTPIP2    | GABARAPL1 |
| KLRD1      | CD82      |
| NETO2      | TUBB      |
| HPCAL4     | PBXIP1    |
| PTPRN2     | CCDC167   |
| SMAD7      | IRGM      |
| GALNT3     | TROAP     |
| RIPOR2     | BTN3A1    |
| SYNE1      | CTDSP2    |
| ZNF532     | CXCL16    |
| SORBS3     | BATF      |
| KIF15      | HSPH1     |
| LDLRAP1    | CDCA7L    |
| SATB1      | TMEM198   |
| FER        | ZFAND2A   |
| NFIL3      | ACYP1     |
| KRT86      | YPEL5     |
| PNP        | IFRD1     |
| CD63       | RNF125    |
| MTMR8      | CKS1B     |
| TIAM1      | SYDE2     |
| VDR        | GOLGA7B   |
| ATN1       | DCBLD1    |
| DPF3       | EID1      |
| NCK2       | EPB4IL4A  |
| BUB1B      | H4C8      |
| PABPC1     | CAMK2G    |
| AGFG1      | FEN1      |
| AREG       | DEPDC1    |
| CD55       | DHFR      |
| SKIL       | GCSAM     |
| NDRG1      | CD5       |
| RUNX3      | EPHX1     |

|           |  |           |
|-----------|--|-----------|
| ZFP36L2   |  | FMN1      |
| FKBP1A    |  | SCART1    |
| HOOK1     |  | ATF3      |
| SPART     |  | CTTNBP2NL |
| CSRNP1    |  | SKA3      |
| SUOX      |  | ZC3HAV1   |
| ZNF165    |  | RBL2      |
| USP6NL    |  | ZGRF1     |
| VSIG10    |  | TTC39A    |
| C1orf61   |  | BLVRA     |
| COL1A1    |  | TMEM106C  |
| FAM102A   |  | IGFBP4    |
| MAFF      |  | SHMT2     |
| BTLA      |  | THBS1     |
| CDKN1A    |  | ID1       |
| KIF23     |  | NSD2      |
| TTYH3     |  | KLHL6     |
| ZCCHC14   |  | RANBP1    |
| E2F7      |  | PIK3IP1   |
| MTUS1     |  | PRKAR2A   |
| KCNA3     |  | ARRB1     |
| PRKCI     |  | PRR11     |
| FZD6      |  | GDPD4     |
| TNFSF10   |  | H2AC21    |
| POU2AF1   |  | PPP1R15A  |
| MIDN      |  | MT-ND5    |
| PMEP1A    |  | IGF1R     |
| CERS6     |  | KIF2C     |
| BAZ2B     |  | TMEM163   |
| PON3      |  | DPEP2     |
| MELK      |  | PLEKHG6   |
| KIR2DL4   |  | SFXN5     |
| PTGDR     |  | REEP2     |
| TANC2     |  | DUSP2     |
| RGS13     |  | SNTA1     |
| TNFRSF10D |  | RMI2      |
| RERE      |  | SYNGR3    |
| CTH       |  | ARHGAP12  |
| VSIG1     |  | MAGEH1    |
| LMNA      |  | EBI3      |
| ANLN      |  | SKAP2     |
| SSH2      |  | JUND      |
| ZFYVE9    |  | DEK       |
| IL12RB2   |  | SFXN2     |
| CCNB2     |  | E2F1      |
| ENPP5     |  | GINS2     |
| NCAPG2    |  | PVR       |
| RIPK2     |  | CENPO     |
| ECT2      |  | GEN1      |
| ASB2      |  | ADPRH     |
| PIAS2     |  | HMGB2     |
| ITM2A     |  | PGAM1     |
| HASPIN    |  | ITGAM     |
| ZFP36     |  | FBXO43    |
| COL6A3    |  | TTL       |
| SKA1      |  | AGAP1     |
| COL5A2    |  | THOP1     |
| TMPO      |  | ADTRP     |
| TSHZ1     |  | CKS2      |
| TXNIP     |  | PIP4K2A   |
| PLEKHA5   |  | GALNT6    |
| S100B     |  | SLFN11    |
| TNFSF8    |  | C16orf72  |
| TTC21A    |  | SYNE2     |
| RCAN2     |  | ZNF90     |
| SMC2      |  | RBM38     |
| CA2       |  | BCAT1     |
| ZDHHC11B  |  | PTPRK     |
| LSR       |  | BRDT      |
| TMEM178A  |  | SPDL1     |
| HS3ST3B1  |  | ARRDC2    |
| PTCH1     |  | INCENP    |
| RAB27A    |  | LPIN2     |
| DENND2C   |  | RNF149    |
| TRIO      |  | NDRG2     |
| FAM117A   |  | CDC25C    |
| TPX2      |  | ERP27     |
| ADAMTS3   |  | ARHGAP26  |
| TUFT1     |  | DLG5      |
| PATJ      |  | CD48      |
| SMIM10    |  | CAST      |
| MND1      |  | SIK1      |
| TP53BP2   |  | WARS1     |
| DNAJC6    |  | ATM       |
| ZMIZ1     |  | MTFR2     |

|           |          |
|-----------|----------|
| PHLDA1    | POLE2    |
| NAALADL1  | LEPROTL1 |
| RARA      | PKM      |
| MTSS1     | GSTM3    |
| BARD1     | SLC2A8   |
| RHOU      | SYTL2    |
| RAP1GAP2  | PKIA     |
| ELL2      | IQCN     |
| CD28      | WFDC2    |
| VSIR      | CATSPERB |
| PLCL1     | NBEAL2   |
| IFFO2     | PLCD1    |
| ADRA2B    | NCAM1    |
| EZR       | FOSL1    |
| ARID5A    | CEP152   |
| RNF144A   | GPCPD1   |
| VWA2      | LIMA1    |
| TMEM88    | WHRN     |
| PAM       | PIK3R6   |
| NCAPG     | ANP32E   |
| N4BP3     | SPIRE2   |
| DLGAP5    | NATD1    |
| F11R      | RALGAPA1 |
| SESN1     | OSBPL3   |
| SMC4      | CDC14A   |
| NCALD     | NSG1     |
| PDZD4     | TYMS     |
| DUSP4     | BLM      |
| NTN4      | TMEM273  |
| CENPE     | NFE2L3   |
| FCRL6     | SNRNP25  |
| CLU       | IDS      |
| APOL3     | CDCA7    |
| FOXO3     | GSTO1    |
| KDM6B     | KIFC1    |
| PTTG1     | MBD2     |
| ASTL      | ARSB     |
| GRAMD1B   | ZNF208   |
| SHROOM3   | NME1     |
| PCSK5     | MIDEAS   |
| TP73      | OASL     |
| UTS2      | B4GALT1  |
| SOX13     | ME1      |
| SPC24     | PRUNE2   |
| RORC      | RASA1    |
| CTLA4     | H2BC10   |
| PRDM5     | FAM163B  |
| SEM1      | NUDT1    |
| MT-ND4    | PCLAF    |
| MPZL3     | DENND11  |
| LIPC      | RECQL4   |
| FAM169A   | TSPYL2   |
| PDE4B     | CISH     |
| TRMO      | SPON1    |
| TCP11L2   | NCAPD3   |
| STAT4     | DEPDC1B  |
| HLA-DRA   | TBX21    |
| PITPNM2   | FADS3    |
| EGR1      | GRIP1    |
| PLAGL1    | DOCK9    |
| EHD1      | CCNYL1   |
| TAF4B     | ZNF395   |
| BEX2      | TNFRSF18 |
| SLC2A1    | ORC1     |
| TNFSF14   | CHAF1B   |
| BARX2     | CHMP1B   |
| GNG4      | MAD2L1   |
| HBEGF     | PNRC1    |
| MYEF2     | DOCK5    |
| CKAP2L    | C1orf112 |
| ARHGAP11A | MCL1     |
| DBH       | CTU2     |
| TMEM63A   | NMRK1    |
| JUNB      | EPAS1    |
| GCNT1     | CAPG     |
| CDCA2     | FANCL    |
| AFAP1L2   | BTNL9    |
| STMN1     | ATP1A1   |
| WNT10B    | KCNN1    |
| GTSE1     | SLC16A10 |
| PRNP      | ATAD2    |
| FAM166B   | SAT1     |
| CHEK1     | H3C12    |
| LUZP1     | NOD2     |
| SMAD3     | NAB1     |

|         |          |
|---------|----------|
| H2AC14  | KNSTRN   |
| HDAC7   | PLPP1    |
| ZHX2    | MALT1    |
| ACVR1C  | H2AC12   |
| ZNRF1   | SRGAP2C  |
| CEBPD   | ZNF711   |
| RREB1   | CHEK2    |
| CDK1    | DDX24    |
| DUSP6   | SMIM14   |
| TULP4   | SUPT16H  |
| MT-CO2  | ARIH1    |
| ESPL1   | GPR171   |
| GK      | TNIK     |
| ACSL6   | BTBD9    |
| ANXA1   | ELOVL5   |
| NFIA    | MTBP     |
| PBK     | VANGL1   |
| REL     | TMEM131L |
| H2BC7   | TSPYL1   |
| KNTC1   | ANKEF1   |
| RIN3    | MYBL1    |
| RASSF3  | DBI      |
| ENC1    | GLI1     |
| FKBP11  | DNAJB6   |
| TUBB2A  | CD53     |
| SOCS3   | ABCA12   |
| MATK    | CBX5     |
| TPPP    | MKNK2    |
| GPM6B   | TRAM2    |
| ACP5    | GSAP     |
| TENT5C  | RBX1     |
| AURKB   | WDR62    |
| NFKB1   | ZNF367   |
| KLF5    | ZDHHC11  |
| PIM1    | COQ8A    |
| CCNF    | SIRT1    |
| CEP55   | MAML2    |
| PLCG2   | C11orf21 |
| SMCHD1  | MSI2     |
| USP3    | SPC25    |
| SIPR4   | MT-ATP6  |
| FGFBP2  | ABLIM1   |
| ALDH3A2 | BIN2     |
| SQLE    | ID3      |
| DIAPH3  | ZNF331   |
| GPR55   | ECM2     |
| LMCD1   | UBR7     |
| ATP5PF  | CENPN    |
| BIRC5   | SRGAP2   |
| DUSP8   | ODF2L    |
| FOSB    | SESTD1   |
| S100A10 | PPP2R5C  |
| BUB1    | PCNX1    |
| MT-CO1  | BANF1    |
| FAM184A | DMC1     |
| NAF1    | CACNA2D2 |
| FCHO2   | HSPA2    |
| METTL8  | STAC     |
| PHF1    | RDX      |
| ANKS1B  | H2AZ1    |
| SHCBP1  | MAD2L2   |
| FBXO5   | MUC3A    |
| SAMD3   | SLAMF7   |
| HELB    | TRIM22   |
| CXCR4   | NOSTRIN  |
| MEGF6   | AMIGO1   |
| TMOD2   | CREB3L3  |
| EPHA1   | TRIM39   |
| MYADM   | H2BC17   |
| FOSL2   | PPP1CB   |
| GALNT1  | SESN2    |
|         | MCM6     |
|         | TPI1     |
|         | FILIP1L  |
|         | GLIPR1   |
|         | IQSEC1   |
|         | PLPP2    |
|         | KLF9     |
|         | NCS1     |
|         | RHOQ     |
|         | SMPDL3A  |
|         | RPS6KA2  |
|         | DYRK2    |
|         | CTNNA1   |
|         | CD2BP2   |

|  |  |            |
|--|--|------------|
|  |  | H4C13      |
|  |  | TLR3       |
|  |  | CENPL      |
|  |  | MIA3       |
|  |  | DMXL2      |
|  |  | ELP6       |
|  |  | GMPR2      |
|  |  | MYO6       |
|  |  | PRKAG2     |
|  |  | OFD1       |
|  |  | CTTN       |
|  |  | ITGA9      |
|  |  | HMGB3      |
|  |  | TMED8      |
|  |  | ITGB8      |
|  |  | TMEM108    |
|  |  | ITPKB      |
|  |  | DOT1L      |
|  |  | DMRT2      |
|  |  | H4C5       |
|  |  | NDC80      |
|  |  | KLF13      |
|  |  | EVC        |
|  |  | BCL2L12    |
|  |  | KIF20B     |
|  |  | RFC4       |
|  |  | FHL1       |
|  |  | LFNG       |
|  |  | RGCC       |
|  |  | TRIM8      |
|  |  | CHD2       |
|  |  | TAGAP      |
|  |  | CX3CR1     |
|  |  | C16orf54   |
|  |  | SEC11A     |
|  |  | NEIL1      |
|  |  | TALDO1     |
|  |  | GBP5       |
|  |  | AC013394.1 |
|  |  | MUC5AC     |
|  |  | FGF9       |
|  |  | SERP2      |
|  |  | MADD       |
|  |  | FBXO32     |
|  |  | H2BC4      |
|  |  | MUC5B      |
|  |  | GPX3       |
|  |  | TRANK1     |
|  |  | AUH        |
|  |  | GYG1       |
|  |  | DPYD       |
|  |  | LRIG1      |
|  |  | SAE1       |
|  |  | USP2       |
|  |  | APOBEC3C   |
|  |  | COPRS      |
|  |  | PSMC3      |
|  |  | AMPD3      |
|  |  | AXIN2      |
|  |  | NAALAD2    |
|  |  | NIPAL4     |
|  |  | GCNT4      |
|  |  | TIPIN      |
|  |  | ITPRIP     |

Genes are listed in the order of the value of  $\log_2$ FoldChange.
