# Supplementary material for: 4-1BB co-stimulation further enhances anti-PD-1-mediated reinvigoration of exhausted CD39+ CD8 T cells from primary and metastatic sites of epithelial ovarian cancers
Source: PubMed Central journal article supplement — J Immunother Cancer. 2020 Dec 16;8(2):e001650. doi: 10.1136/jitc-2020-001650 (PMC7745695; doi:10.1136/jitc-2020-001650), 2020-12-16
Supplement: jitc-2020-001650supp007.pdf [file jitc-2020-001650supp007.pdf]

**Supplementary Table S6. A list of 520 differentially expressed genes that are significantly down- or up-regulated in 4-1BB<sup>pos</sup> PD-1<sup>high</sup> CD39<sup>+</sup> TILs, compared to 4-1BB<sup>neg</sup> PD-1<sup>high</sup> CD39<sup>+</sup> TILs**

| Significantly down-regulated genes in 4-1BB <sup>pos</sup> PD-1 <sup>high</sup> CD39 <sup>+</sup> TILs<br>(vs. 4-1BB <sup>neg</sup> PD-1 <sup>high</sup> CD39 <sup>+</sup> TILs) |              |              |                |              |              |                | Significantly up-regulated genes in 4-1BB <sup>pos</sup> PD-1 <sup>high</sup> CD39 <sup>+</sup> TILs<br>(vs. 4-1BB <sup>neg</sup> PD-1 <sup>high</sup> CD39 <sup>+</sup> TILs) |              |                |              |              |              |              |
|----------------------------------------------------------------------------------------------------------------------------------------------------------------------------------|--------------|--------------|----------------|--------------|--------------|----------------|--------------------------------------------------------------------------------------------------------------------------------------------------------------------------------|--------------|----------------|--------------|--------------|--------------|--------------|
| 4-1BBneg cells                                                                                                                                                                   |              |              | 4-1BBpos cells |              |              | 4-1BBneg cells |                                                                                                                                                                                |              | 4-1BBpos cells |              |              |              |              |
| Gene name                                                                                                                                                                        | Pt 1         | Pt 2         | Pt 3           | Pt 1         | Pt 2         | Pt 3           | Gene name                                                                                                                                                                      | Pt 1         | Pt 2           | Pt 3         | Pt 1         | Pt 2         | Pt 3         |
| FOSB                                                                                                                                                                             | 9.92496<br>5 | 9.80436<br>9 | 9.61180<br>4   | 9.76085<br>4 | 9.55460<br>3 | 8.47625<br>3   | SPC25                                                                                                                                                                          | 2.82975<br>9 | 2.53201<br>8   | 1.83699<br>5 | 3.05751<br>5 | 3.79646<br>6 | 3.66172<br>7 |
| PTGER4                                                                                                                                                                           | 7.26693<br>3 | 7.28598<br>5 | 7.19060<br>1   | 6.84482<br>4 | 6.61319<br>8 | 5.90088<br>2   | GMNN                                                                                                                                                                           | 4.55416<br>7 | 5.05351<br>8   | 3.79176<br>5 | 4.95671<br>3 | 5.63164<br>7 | 4.93921<br>3 |
| ABI3                                                                                                                                                                             | 6.24122<br>1 | 6.45779<br>3 | 6.27735<br>5   | 5.85419<br>6 | 5.81360<br>6 | 5.18958<br>2   | ING3                                                                                                                                                                           | 4.78602<br>3 | 5.23034<br>6   | 4.49070<br>5 | 5.22964<br>8 | 5.62759<br>7 | 5.34212<br>1 |
| LITAF                                                                                                                                                                            | 9.06689<br>4 | 9.17420<br>4 | 8.99478<br>9   | 8.79217<br>8 | 8.74965<br>7 | 8.08497<br>5   | KIF14                                                                                                                                                                          | 4.58732<br>3 | 4.59859<br>6   | 4.62494<br>7 | 5.12658<br>3 | 5.70643<br>7 | 5.26241<br>4 |
| ZNF10                                                                                                                                                                            | 4.90912<br>8 | 4.98940<br>7 | 4.74775<br>8   | 4.33282<br>8 | 4.40018<br>2 | 3.50431<br>8   | CENPE                                                                                                                                                                          | 6.54529<br>5 | 6.55450<br>7   | 6.47696<br>9 | 6.84945<br>5 | 7.22848<br>3 | 6.96595<br>2 |
| TNFAIP3                                                                                                                                                                          | 11.4201<br>9 | 11.2484<br>4 | 11.4068<br>2   | 11.1877<br>9 | 10.9900<br>9 | 10.5350<br>7   | CDC47                                                                                                                                                                          | 3.80074<br>9 | 4.20586<br>9   | 3.92787<br>5 | 4.43496<br>3 | 5.46931<br>7 | 4.40814<br>8 |
| NAPA                                                                                                                                                                             | 5.94770<br>1 | 5.79864<br>8 | 5.64849<br>8   | 5.48906<br>2 | 5.42803<br>1 | 4.78041<br>1   | MMS22L                                                                                                                                                                         | 5.34681<br>1 | 5.63601<br>1   | 5.38552<br>2 | 5.84030<br>4 | 6.34003<br>9 | 5.76094<br>1 |
| EMB                                                                                                                                                                              | 8.62816<br>7 | 8.15243<br>8 | 7.76648<br>1   | 7.69842<br>4 | 7.62737<br>8 | 7.80079<br>1   | PRMT1                                                                                                                                                                          | 4.08233<br>6 | 4.27920<br>3   | 4.19938<br>6 | 4.57576<br>3 | 5.65568<br>6 | 4.98628<br>3 |
| VPS13C                                                                                                                                                                           | 9.62964<br>1 | 8.95021<br>3 | 8.57859<br>8   | 8.82546<br>7 | 8.29244<br>7 | 8.60569<br>8   | TTK                                                                                                                                                                            | 3.68300<br>1 | 4.14177<br>4   | 3.79176<br>5 | 4.13460<br>5 | 5.12352<br>9 | 4.64448<br>5 |
| UGP2                                                                                                                                                                             | 7.45828<br>7 | 7.06878<br>8 | 6.66013<br>1   | 6.73649<br>1 | 6.21516<br>1 | 6.47283<br>5   | FANCA                                                                                                                                                                          | 5.20449<br>5 | 5.76925<br>2   | 5.41362<br>2 | 5.93048<br>7 | 6.56957<br>6 | 6.50782<br>1 |
| SOS1                                                                                                                                                                             | 7.29228<br>7 | 6.85757<br>3 | 6.61647<br>4   | 6.56126<br>5 | 6.22322<br>6 | 6.43213<br>2   | ARHGAP3                                                                                                                                                                        | 2.21785<br>6 | 3.11614<br>9   | 2.22306<br>7 | 2.95810<br>3 | 4.21843<br>6 | 4.20711<br>7 |
| CD48                                                                                                                                                                             | 6.38484<br>9 | 6.46828<br>4 | 5.96563<br>2   | 5.97778<br>5 | 5.23941<br>6 | 5.59298<br>2   | RFC5                                                                                                                                                                           | 4.01082<br>7 | 4.71769<br>7   | 3.97891<br>6 | 4.65196<br>5 | 5.40929<br>9 | 5.05096<br>9 |
| CD53                                                                                                                                                                             | 8.95783<br>2 | 8.74710<br>9 | 8.47961<br>9   | 8.46935<br>6 | 7.89982<br>5 | 8.14250<br>7   | DDX11                                                                                                                                                                          | 4.50296<br>4 | 4.83583<br>5   | 4.30316<br>7 | 5.0401<br>9  | 5.94296<br>9 | 5.26241<br>4 |
| PIP4K2A                                                                                                                                                                          | 8.72816<br>4 | 8.45371<br>5 | 8.09618<br>2   | 8.35757<br>5 | 7.54932<br>3 | 7.80548<br>6   | DNA2                                                                                                                                                                           | 4.29794<br>7 | 4.55988<br>1   | 4.00377<br>5 | 4.68343<br>1 | 5.33680<br>4 | 4.87634<br>6 |
| EPB41                                                                                                                                                                            | 7.95865<br>4 | 7.72926<br>7 | 7.43065<br>2   | 7.57383<br>2 | 6.92318<br>7 | 7.08038<br>7   | CRTAM                                                                                                                                                                          | 9.15660<br>1 | 9.27363<br>1   | 7.23851<br>5 | 9.41608<br>8 | 9.71621<br>4 | 8.33727<br>8 |
| HAUS3                                                                                                                                                                            | 7.4538<br>5  | 6.98724<br>4 | 6.80683<br>2   | 6.71635<br>5 | 6.34896<br>9 | 6.40268<br>9   | FBN1                                                                                                                                                                           | 1.59151<br>5 | -0.3006<br>-   | -<br>2.76587 | 2.37406<br>9 | 2.19911<br>1 | 1.03207<br>1 |
| ELF1                                                                                                                                                                             | 9.49581<br>5 | 9.09856<br>8 | 9.06880<br>8   | 8.83717<br>2 | 8.48756<br>6 | 8.48212<br>6   | CHST3                                                                                                                                                                          | -<br>0.27024 | -<br>2.55314   | -<br>6.64386 | 0.16184<br>4 | 1.54882<br>8 | 0.22999<br>7 |
| TBX21                                                                                                                                                                            | 6.61125<br>2 | 6.27566<br>2 | 6.11571<br>3   | 5.97778<br>5 | 5.35558<br>7 | 5.46589<br>7   | H2BC7                                                                                                                                                                          | 7.06108<br>7 | 6.82936<br>5   | 6.76563<br>9 | 8.16667<br>7 | 7.20966<br>1 | 7.01703<br>7 |
| BRWD3                                                                                                                                                                            | 7.30479<br>9 | 6.92767<br>1 | 6.61445<br>8   | 6.56126<br>1 | 6.26550<br>1 | 6.11569<br>7   | H2BC9                                                                                                                                                                          | 6.81041<br>1 | 6.35412<br>6   | 6.40647<br>7 | 7.57523<br>7 | 7.15729<br>7 | 6.50782<br>1 |
| UBE3B                                                                                                                                                                            | 6.11618<br>1 | 5.94854<br>5 | 5.60854<br>1   | 5.61407<br>1 | 5.37108<br>9 | 5.22365<br>4   | H2AC11                                                                                                                                                                         | 7.32459<br>5 | 7.46950<br>9   | 6.85714<br>9 | 8.36325<br>3 | 7.73566<br>2 | 7.52492<br>3 |
| RBL2                                                                                                                                                                             | 7.64503<br>5 | 7.23927<br>5 | 6.85031<br>2   | 7.07183<br>2 | 6.45323<br>2 | 6.47283<br>5   | RACGAP1                                                                                                                                                                        | 6.36586<br>8 | 6.26366<br>6   | 6.02451<br>6 | 6.99449<br>4 | 6.65156<br>1 | 6.38523<br>4 |
| MGA                                                                                                                                                                              | 7.76940<br>6 | 7.41496<br>4 | 6.87578<br>5   | 7.12053<br>8 | 6.66346<br>6 | 6.61867<br>6   | HI-5                                                                                                                                                                           | 5.22570<br>6 | 5.33723<br>3   | 5.00947<br>6 | 6.69849<br>3 | 5.82778<br>2 | 5.84725<br>1 |
| DIP2A                                                                                                                                                                            | 7.65288<br>1 | 7.59209<br>2 | 6.78727<br>8   | 7.34373<br>6 | 6.71013<br>6 | 6.57973<br>8   | H3C7                                                                                                                                                                           | 3.48612<br>8 | 3.77004<br>5   | 3.38182<br>3 | 5.38445<br>2 | 4.41903<br>2 | 4.45670<br>5 |
| SYNE2                                                                                                                                                                            | 10.8865<br>6 | 10.7483<br>9 | 10.2723<br>9   | 10.5582<br>9 | 10.2786<br>1 | 9.65671<br>3   | H2AC14                                                                                                                                                                         | 5.56222<br>2 | 5.69526<br>5   | 5.48156<br>2 | 6.84017<br>8 | 6.31414<br>4 | 6.02522<br>2 |
| PYHIN1                                                                                                                                                                           | 7.73098<br>3 | 7.40544<br>1 | 6.99990<br>2   | 7.44665<br>4 | 6.72156<br>4 | 6.33676<br>3   | KATNB1                                                                                                                                                                         | 3.52086<br>3 | 3.71824<br>5   | 3.52608<br>1 | 5.11124<br>1 | 4.41903<br>2 | 3.89104<br>2 |
| NEK9                                                                                                                                                                             | 6.85533<br>3 | 6.39043<br>6 | 6.06936<br>4   | 6.34546<br>5 | 5.98152<br>2 | 5.53083<br>9   | AURKB                                                                                                                                                                          | 4.90912<br>8 | 4.18057<br>1   | 4.36203<br>1 | 5.72910<br>7 | 5.75175<br>2 | 4.94603<br>2 |
| ARIH1                                                                                                                                                                            | 8.57853<br>7 | 8.19884<br>9 | 8.13326<br>7   | 7.86777<br>1 | 7.96541<br>2 | 7.60142<br>2   | THOC6                                                                                                                                                                          | 2.88413<br>1 | 1.82311<br>1   | 1.94362<br>1 | 3.83172<br>8 | 4.03509<br>5 | 2.94743<br>5 |
| WDR26                                                                                                                                                                            | 9.43849<br>3 | 8.88563<br>5 | 8.65610<br>5   | 8.65804<br>6 | 8.48979<br>8 | 8.10415<br>5   | H4C13                                                                                                                                                                          | 2.13058<br>7 | 1.53451<br>3   | 1.59672<br>3 | 3.58749<br>6 | 3.10744<br>3 | 2.54205<br>1 |
| HECA                                                                                                                                                                             | 7.50023<br>3 | 6.85757<br>3 | 6.82960<br>5   | 6.60573<br>5 | 6.38775<br>8 | 6.25675<br>1   | UBE2C                                                                                                                                                                          | 5.01037<br>9 | 4.55003<br>7   | 4.94676<br>7 | 6.20436<br>9 | 6.20704<br>9 | 5.44197<br>7 |
| BICRAL                                                                                                                                                                           | 6.77487<br>8 | 6.37379<br>1 | 6.29004<br>2   | 6.03582<br>3 | 6.00666<br>4 | 5.83628<br>2   | CDC25C                                                                                                                                                                         | 2.30014<br>6 | 1.61225<br>1   | 1.89129<br>3 | 3.71477<br>4 | 3.78197<br>7 | 2.89201<br>4 |
| SDCBP                                                                                                                                                                            | 8.58982<br>8 | 7.87929<br>4 | 7.57553<br>4   | 7.77222<br>8 | 7.51578<br>5 | 7.39514<br>9   | MTFR2                                                                                                                                                                          | 3.96110<br>5 | 3.73571<br>9   | 3.38182<br>3 | 4.65196<br>5 | 5.20181<br>2 | 4.49440<br>8 |
| ALG13                                                                                                                                                                            | 7.17451<br>2 | 6.49674<br>7 | 6.15508<br>1   | 6.27835<br>9 | 5.95915<br>8 | 6.03804<br>2   | LIG1                                                                                                                                                                           | 5.36604<br>3 | 5.34863<br>5   | 5.05180<br>9 | 5.86795<br>6 | 6.06766<br>6 | 5.56224<br>5 |
| ELOVL5                                                                                                                                                                           | 8.61917<br>8 | 7.55443<br>5 | 7.60730<br>5   | 7.72764<br>6 | 7.30141<br>3 | 7.15732<br>4   | POLQ                                                                                                                                                                           | 5.47634<br>1 | 5.21796<br>5   | 5.21504<br>8 | 6.19348<br>2 | 6.53974<br>4 | 5.95258<br>6 |



|              |              |              |              |              |              |              |              |              |              |              |              |              |              |
|--------------|--------------|--------------|--------------|--------------|--------------|--------------|--------------|--------------|--------------|--------------|--------------|--------------|--------------|
| APOL3        | 6.66658<br>9 | 6.74774<br>8 | 6.80859<br>7 | 6.51537      | 5.73680<br>4 | 6.38272<br>3 | SMS          | 5.12770<br>1 | 4.95997<br>3 | 5.91082<br>8 | 5.53578<br>3 | 5.75175<br>2 | 6.50089<br>1 |
| N4BP1        | 8.46606<br>5 | 8.27626<br>9 | 8.96740<br>6 | 8.23905<br>1 | 7.62940<br>3 | 8.43745<br>9 | SAE1         | 6.29237<br>9 | 6.21465<br>9 | 6.85031<br>2 | 6.92599<br>3 | 6.88301<br>3 | 7.25391<br>2 |
| TENT4B       | 7.25408<br>7 | 7.10957<br>1 | 7.69195<br>8 | 6.41272      | 6.25766<br>8 | 7.13660<br>9 | DHFR         | 4.27777<br>9 | 3.93039<br>9 | 4.86771<br>5 | 5.17903<br>6 | 5.01620<br>3 | 5.67735<br>7 |
| RDH13        | 4.37591<br>1 | 4.36029<br>1 | 4.74038<br>1 | 3.65253<br>9 | 3.43830<br>5 | 4.19571<br>1 | CENPH        | 3.37660<br>5 | 3.14259<br>1 | 4.14455<br>4 | 4.49530<br>5 | 4.26084<br>9 | 4.97299      |
| FAM177A<br>1 | 7.08739<br>6 | 7.25450<br>9 | 7.71660<br>3 | 6.78806      | 6.60499      | 7.04906      | AHCY         | 2.93652<br>9 | 2.40671<br>4 | 3.57666<br>4 | 3.93990<br>8 | 4.08316<br>8 | 4.26278<br>9 |
| MPRIP        | 6.78205<br>5 | 6.75847<br>4 | 7.19330<br>5 | 6.51537      | 6.19068<br>8 | 6.63985<br>3 | GPT2         | -<br>0.27024 | -<br>1.59611 | 1.30827<br>3 | 2.09088<br>6 | 2.10911<br>9 | 2.46818<br>1 |
| RBM38        | 6.13872      | 6.79643<br>8 | 7.29373<br>5 | 6.02358<br>1 | 6.00666<br>4 | 6.78192<br>4 | TFDP1        | 6.95395<br>3 | 6.67262<br>1 | 7.51629<br>4 | 7.64614<br>9 | 7.63948<br>4 | 7.76845<br>6 |
| ATP1B3       | 8.33800<br>4 | 8.48956<br>1 | 9.06807<br>1 | 7.62334<br>6 | 7.81697<br>1 | 8.69239<br>8 | ATPSMC1      | 4.84203<br>7 | 4.47918<br>5 | 5.52514<br>2 | 5.65697<br>1 | 5.59895<br>2 | 5.96270<br>9 |
| RALGAPA<br>1 | 7.74940<br>7 | 7.81498<br>8 | 8.17763<br>8 | 7.22045      | 7.05857      | 8.03148      | TTL          | 5.73489      | 5.10820      | 5.74748      | 6.13018<br>8 | 5.82425<br>1 | 6.55095<br>3 |
| PRMT9        | 6.91857      | 6.09451<br>7 | 6.63050<br>8 | 5.81684<br>9 | 5.71408<br>9 | 6.31848<br>7 | PGAM1        | 5.95406<br>9 | 5.62198<br>4 | 6.30512<br>1 | 6.27835<br>9 | 6.29386<br>2 | 6.89019      |
| GPRIN3       | 9.72396<br>1 | 9.24798<br>3 | 9.55354<br>3 | 9.06230<br>6 | 8.85464<br>1 | 9.19172<br>4 | TUBGCP3      | 4.99810<br>4 | 4.39370<br>6 | 5.38552<br>2 | 5.27854<br>5 | 5.41869<br>5 | 5.91832<br>2 |
| MTMR10       | 5.86900<br>2 | 5.42062<br>9 | 5.67582<br>5 | 5.10350<br>7 | 4.87998<br>2 | 5.35754<br>7 | MUC3A        | 4.27777<br>9 | 2.11781<br>2 | 3.13415<br>5 | 3.39818<br>7 | 4.69128<br>9 | 4.72598<br>3 |
| P1P22        | 8.91358<br>8 | 8.44378<br>2 | 8.83644<br>6 | 8.11376<br>2 | 7.90411<br>2 | 8.74905<br>9 | C12orf45     | 4.41336<br>8 | 3.40535<br>3 | 3.30389<br>8 | 4.6306<br>4  | 4.61976<br>4 | 4.53068<br>2 |
| OTULINL<br>4 | 6.01625<br>4 | 5.17377<br>8 | 5.93687<br>8 | 4.89533      | 4.69128<br>9 | 5.81409      | CCR3         | -<br>0.84653 | -<br>6.64386 | -<br>6.64386 | 1.65597<br>6 | 1.32725<br>7 | 0.54946<br>3 |
| EML4         | 8.79354<br>5 | 8.39306<br>3 | 8.75322<br>2 | 8.13573<br>2 | 7.70814<br>6 | 8.58181<br>6 | SLC14A2      | -<br>0.84653 | -<br>6.64386 | -<br>6.64386 | 1.27036<br>1 | 0.48385<br>3 | 0.03910<br>8 |
| PPP1CB       | 7.82605<br>7 | 7.22233<br>1 | 7.80323<br>2 | 7.13198<br>7 | 6.43250<br>9 | 7.76170<br>8 | PLEKHA7      | 4.53730<br>1 | 2.06349<br>2 | 3.13415<br>5 | 5.15679      | 4.5868       | 4.48507<br>4 |
| YPEL5        | 9.82687<br>7 | 9.89123<br>9 | 10.0365<br>3 | 9.18050<br>2 | 8.93705<br>3 | 9.45038<br>5 | ADAMTS<br>13 | 0.45974<br>5 | -<br>2.55314 | -<br>1.24785 | 2.02690<br>4 | 1.15805<br>1 | 1.54452<br>6 |
| SH2B3        | 5.15006<br>2 | 5.19919<br>3 | 5.36648      | 4.49530<br>5 | 3.88047<br>2 | 4.83286      | POMGNT<br>1  | 4.01082<br>7 | 2.85344<br>7 | 3.45575<br>5 | 4.34599<br>7 | 4.85942<br>8 | 4.16096<br>5 |
| MADD         | 7.49805<br>5 | 7.77011<br>4 | 7.76920<br>2 | 7.11670<br>1 | 7.06755<br>8 | 7.36493<br>6 | CARMIL3      | 2.98709      | 1.45234<br>1 | 2.18009<br>2 | 3.9911       | 4.66783<br>9 | 3.89104<br>2 |
| TRIM39       | 5.44050<br>3 | 5.91825<br>6 | 5.87759      | 4.98223<br>7 | 4.74456<br>7 | 5.48942<br>8 | ECT2         | 5.85545<br>8 | 5.30832<br>8 | 5.57989<br>6 | 6.29203<br>3 | 6.45094<br>4 | 6.13671<br>2 |
| ZDHHC2       | 5.26721<br>4 | 4.79474<br>5 | 5.20971<br>6 | 3.83172<br>8 | 4.25036<br>2 | 5.01898<br>8 | ESCO2        | 4.98572<br>5 | 4.18057<br>1 | 4.37161<br>3 | 5.00732      | 5.78482      | 5.27871<br>1 |
| GNA13        | 8.8671       | 8.90314<br>2 | 8.71091<br>8 | 8.16296<br>1 | 8.28668<br>6 | 8.64237<br>1 | FAM111B      | 4.10540<br>7 | 3.51061<br>9 | 3.73350<br>1 | 4.29258<br>4 | 4.72197<br>9 | 4.76506<br>9 |
| FBXW7        | 7.38004      | 7.35120<br>7 | 7.34691<br>9 | 6.52118<br>7 | 6.76825<br>3 | 7.06324<br>1 | MAD2L1       | 3.96110<br>5 | 3.06176<br>5 | 3.60942<br>7 | 4.31953<br>8 | 4.69128<br>9 | 4.46622<br>4 |
| ERAP2        | 7.70667<br>3 | 7.83842<br>9 | 7.76284<br>5 | 7.10125<br>1 | 7.19742<br>9 | 7.50658<br>9 | TELO2        | 2.65314<br>6 | 1.06693<br>9 | 1.99411<br>8 | 2.92338<br>3 | 3.40086<br>5 | 3.38434<br>4 |
| ARHGDI<br>A  | 5.63537<br>3 | 6.79435<br>5 | 6.58181      | 5.51843<br>9 | 6.43945      | 5.56224<br>5 | CDAN1        | 3.03593<br>9 | 2.53201<br>8 | 3.22152<br>1 | 4.27891<br>7 | 3.79646<br>6 | 4.30583<br>6 |
| CD55         | 7.48272      | 8.14346<br>7 | 7.85452      | 6.92379<br>6 | 7.39125<br>6 | 7.29455<br>1 | CKS1B        | 4.61972<br>8 | 4.14177<br>4 | 4.60071<br>1 | 5.16424<br>3 | 5.02853      | 5.48006<br>2 |
| B3GNT5       | 5.18296<br>8 | 5.64990<br>3 | 5.36648      | 4.58689<br>6 | 4.87316<br>3 | 4.92547<br>7 | WDR76        | 5.79997<br>3 | 5.36557<br>1 | 5.50351<br>6 | 6.44673<br>6 | 6.33414<br>5 | 6.55764<br>7 |
| ATP6V1H<br>1 | 6.11049<br>1 | 5.94103<br>2 | 6.08400<br>8 | 5.25779<br>2 | 5.66755<br>5 | 5.62732<br>6 | TRAP1        | 3.52086<br>3 | 2.53201<br>8 | 2.99230<br>6 | 4.45940<br>2 | 4.40018<br>2 | 4.17264      |
| PRKAA1       | 6.75677<br>8 | 6.83545<br>2 | 6.58593<br>6 | 5.95647<br>8 | 6.30150<br>1 | 6.35992<br>6 | NRGN         | -<br>0.84653 | -<br>2.55314 | -<br>1.24785 | 1.56879<br>9 | 1.67964<br>4 | 1.31093<br>3 |
| SRRD         | 4.72774<br>6 | 4.86788<br>5 | 4.28299<br>9 | 3.42325<br>4 | 4.09493      | 3.89104<br>2 | CFAP157      | 1.71664<br>7 | -<br>6.64386 | -<br>1.81578 | 1.65597<br>6 | 1.40495<br>7 | 0.92569<br>8 |
| ISCA1        | 5.97300<br>8 | 6.44191<br>2 | 6.31011<br>2 | 5.15679      | 5.56972<br>8 | 6.35224<br>6 | SRGAP1       | -<br>1.82082 | -<br>6.64386 | -<br>2.76587 | 1.15538<br>2 | -<br>0.24625 | 0.54946<br>3 |
| ADSS2        | 5.61139<br>9 | 6.06717<br>1 | 6.07816<br>8 | 4.81236<br>9 | 5.61129<br>8 | 5.77249<br>6 | DAD1         | 5.91543      | 5.14790<br>6 | 5.96879<br>2 | 6.26801<br>9 | 6.20704<br>9 | 6.45859<br>9 |
| PDZD8        | 7.07868      | 7.78382<br>8 | 7.63839<br>5 | 6.70105<br>8 | 7.00655<br>2 | 7.40384<br>3 | CEP72        | 1.83178<br>6 | -0.3006      | 2.34480<br>7 | 3.26586<br>8 | 2.43963<br>5 | 3.00080<br>7 |
| SIRT2        | 6.02232<br>8 | 6.82529<br>5 | 6.65817<br>5 | 5.52424<br>3 | 5.95270<br>4 | 6.16036      | H4C9         | 5.37556<br>3 | 4.12860<br>6 | 4.88119<br>3 | 6.03175<br>4 | 5.14066<br>5 | 5.57109<br>4 |
| CCDC115      | 5.05845<br>9 | 5.88340<br>3 | 5.56326<br>9 | 4.43496      | 5.07681<br>1 | 5.27871<br>1 | ZBED2        | 7.12457<br>1 | 6.35412<br>6 | 6.89252<br>1 | 7.68941<br>1 | 7.13038<br>5 | 7.50543<br>5 |
| PIK3AP1      | 6.13311<br>8 | 6.88328<br>1 | 7.24634<br>8 | 5.83564<br>4 | 6.13191<br>7 | 6.06648<br>2 | SRD5A1       | 2.65314<br>6 | 1.27247<br>2 | 2.59433<br>4 | 3.85033<br>1 | 2.67739<br>4 | 3.42843<br>8 |
| RANBP2       | 10.0576<br>7 | 10.0987<br>6 | 10.7058<br>1 | 9.45497<br>3 | 9.60073<br>9 | 10.0134<br>9 | XXYL1        | 4.53730<br>1 | 2.44970<br>3 | 4.22074<br>8 | 5.26474<br>3 | 4.22915<br>6 | 4.30583<br>6 |
| ETV3         | 6.29739<br>7 | 6.49161<br>4 | 6.78727<br>8 | 5.52424<br>3 | 6.01288<br>2 | 6.13968      | GEM          | 7.48931<br>2 | 6.27864<br>6 | 6.81563<br>4 | 8.25047<br>6 | 7.31153<br>4 | 7.10801<br>2 |
| RASA2        | 7.67425<br>3 | 7.40953<br>6 | 6.73812<br>3 | 6.52986<br>8 | 6.87279<br>4 | 6.65865<br>5 | H2BC4        | 8.12593      | 7.38066<br>3 | 7.90406<br>1 | 8.93191<br>3 | 8.00649<br>1 | 8.12383<br>4 |
| UQCRB        | 7.11323<br>4 | 7.28746<br>7 | 6.22281<br>7 | 6.05599<br>8 | 6.59880<br>3 | 6.31585<br>7 | H4C2         | 5.24660<br>9 | 4.83583<br>5 | 4.41858<br>8 | 5.97354<br>9 | 5.16320<br>1 | 5.54438<br>2 |
| FEM1C        | 7.02221<br>7 | 7.18465<br>5 | 6.42500<br>1 | 6.14533<br>2 | 6.57168<br>3 | 6.39274<br>1 | TNFSF4       | 7.94273      | 6.44987<br>4 | 6.64835<br>5 | 7.87913<br>9 | 7.32533<br>9 | 8.37629<br>7 |

|          |              |              |              |              |              |              |          |              |              |              |              |              |              |
|----------|--------------|--------------|--------------|--------------|--------------|--------------|----------|--------------|--------------|--------------|--------------|--------------|--------------|
| EVIZB    | 7.38946<br>9 | 7.52583<br>8 | 6.66792<br>8 | 6.64888<br>7 | 6.43482<br>7 | 6.44662<br>8 | TNFRSF9  | 9.14898<br>8 | 8.86841<br>3 | 8.82428<br>6 | 9.41296<br>3 | 9.17535<br>1 | 9.71101<br>6 |
| ECHDC2   | 6.17188<br>3 | 6.01803<br>1 | 5.25701<br>6 | 5.43462<br>6 | 4.99122<br>9 | 5.11287<br>8 | KNL1     | 6.40358<br>3 | 6.12135<br>5 | 6.49461<br>5 | 6.67781<br>1 | 7.12752<br>3 | 6.98759<br>5 |
| MAF      | 7.20953<br>5 | 6.93714<br>3 | 6.37585<br>9 | 6.15284<br>5 | 6.09429<br>7 | 6.24020<br>2 | DIAPH3   | 4.01082<br>7 | 3.64615<br>2 | 4.33289<br>9 | 4.25118<br>6 | 5.20181<br>2 | 4.81061<br>5 |
| CUL3     | 8.04322<br>2 | 7.82011<br>6 | 7.27853<br>6 | 7.21687<br>7 | 7.17681<br>1 | 7.11408<br>7 | TMPO     | 7.19616<br>5 | 6.58133<br>4 | 7.17290<br>1 | 7.29194<br>1 | 7.73189<br>8 | 7.56201<br>6 |
| ZFAND6   | 6.14430<br>1 | 6.12467<br>5 | 5.58402<br>3 | 5.31917<br>7 | 5.48281<br>1 | 5.35754<br>7 | LMCD1    | 4.44987<br>7 | 3.33830<br>4 | 4.25220<br>9 | 4.49530<br>5 | 5.36137<br>6 | 5.37786<br>2 |
| MYO15B   | 4.03505<br>9 | 4.00435<br>1 | 3.20017<br>1 | 2.73602<br>7 | 2.67739<br>7 | 2.71170<br>1 | MELK     | 5.44050<br>3 | 4.91466<br>4 | 5.37603<br>2 | 5.67273<br>5 | 6.16579<br>3 | 6.13671<br>2 |
| VPS11    | 6.22551<br>3 | 6.68391<br>7 | 6.04561<br>9 | 5.71395<br>7 | 5.97516<br>8 | 5.60595<br>7 | WDHD1    | 4.89595<br>7 | 4.77797<br>5 | 5.05180<br>9 | 5.73412<br>4 | 6.15458<br>9 | 5.84725<br>1 |
| ZNF552   | 4.39476<br>1 | 5.35994<br>8 | 4.39998<br>8 | 3.95717<br>5 | 4.26084<br>9 | 3.86249<br>2 | BUB1B    | 5.92194<br>2 | 5.58389<br>9 | 5.95611<br>1 | 6.40014<br>5 | 6.70821<br>5 | 6.51242<br>2 |
| NR4A3    | 6.82438<br>3 | 7.19574<br>5 | 7.00606<br>7 | 6.35852<br>7 | 6.64956<br>7 | 6.22626<br>5 | DEK      | 7.07868<br>7 | 6.99452<br>1 | 7.15775<br>7 | 7.36329<br>7 | 7.76542<br>7 | 7.77995<br>2 |
| PPP1R18  | 6.92182<br>3 | 7.47342<br>7 | 6.9189<br>8  | 6.65418<br>4 | 6.93632<br>4 | 6.12774<br>3 | CTTN     | 0.94217<br>1 | 0.69049<br>2 | 1.30827<br>3 | 2.09088<br>1 | 2.54636<br>1 | 2.74336<br>2 |
| MIDEAS   | 7.81210<br>1 | 8.16054<br>7 | 7.94233<br>8 | 7.55977<br>2 | 7.77551<br>9 | 7.10496<br>9 | ANP32E   | 7.87386<br>4 | 7.65428<br>9 | 8.03945<br>6 | 8.18877<br>3 | 8.45938<br>2 | 8.65126<br>5 |
| SDE2     | 7.54310<br>7 | 7.89103<br>9 | 7.41220<br>6 | 7.40479<br>1 | 7.26280<br>1 | 6.75499<br>6 | GINS1    | 3.52086<br>3 | 3.16855<br>7 | 3.84775<br>9 | 4.13460<br>5 | 4.67569<br>8 | 4.89760<br>8 |
| VAV3     | 7.06991<br>8 | 7.54454<br>8 | 6.53780<br>8 | 6.65946<br>8 | 6.68114<br>3 | 6.14562<br>5 | MSH2     | 5.04658<br>8 | 4.44772<br>1 | 5.25183<br>1 | 5.24378<br>9 | 5.53126<br>2 | 5.57306<br>9 |
| LAX1     | 6.24122<br>1 | 6.77335<br>6 | 5.86746<br>8 | 5.99460<br>7 | 5.75175<br>2 | 5.43714<br>5 | SCCPDH   | 4.23657<br>8 | 3.44838<br>2 | 5.28769<br>8 | 4.61979<br>7 | 5.19635<br>9 | 5.62732<br>6 |
| STK39    | 6.13872<br>2 | 6.04981<br>5 | 5.80165<br>5 | 5.44077<br>7 | 5.56972<br>8 | 5.11892<br>6 | ABHD12   | 3.80074<br>9 | 3.08921<br>3 | 4.65664<br>5 | 4.05664<br>8 | 4.96581<br>4 | 4.99288<br>4 |
| BTN3A2   | 7.07868<br>6 | 7.24080<br>4 | 6.77469<br>7 | 6.46193<br>7 | 6.71585<br>8 | 6.32111<br>2 | FOXMI    | 4.10540<br>7 | 3.36100<br>1 | 4.72551<br>3 | 5.07215<br>2 | 5.31180<br>6 | 4.58456<br>7 |
| PGRMC2   | 5.61943<br>5 | 5.73055<br>4 | 5.15528<br>4 | 4.91313<br>5 | 4.96581<br>4 | 4.61055<br>2 | CCNB1    | 4.31783<br>6 | 3.57026<br>5 | 4.58432<br>4 | 4.82182<br>6 | 5.17987<br>5 | 4.90462<br>6 |
| JMY      | 7.98065<br>5 | 8.03560<br>9 | 7.58379<br>7 | 7.28853<br>4 | 7.69467<br>3 | 6.58192<br>9 | HOXC4    | 0.45974<br>5 | -<br>1.59611 | 2.86241<br>7 | 3.42325<br>4 | 2.70836<br>9 | 2.42977<br>7 |
| IFRD1    | 8.41504<br>3 | 8.48827<br>6 | 7.67754<br>6 | 7.89378<br>5 | 7.93462<br>9 | 7.13063<br>6 | ALDH1B1  | -<br>0.84653 | -<br>2.55314 | 2.45706<br>9 | 1.65597<br>6 | 2.67739<br>6 | 2.39032<br>3 |
| TINF2    | 5.98549<br>7 | 6.01445<br>6 | 5.30780<br>1 | 5.37163<br>1 | 5.54419<br>8 | 4.76506<br>9 | STPG1    | 2.65314<br>6 | 1.68601<br>5 | 3.06497<br>3 | 4.47146<br>9 | 3.56218<br>4 | 3.21919<br>4 |
| ZNF140   | 4.81430<br>2 | 5.01825<br>3 | 4.17770<br>3 | 3.86869<br>7 | 3.64457<br>9 | 4.02588<br>4 | MAST2    | 3.98618<br>3 | 3.49016<br>4 | 4.13333<br>3 | 4.95671<br>5 | 4.73707<br>5 | 4.28447<br>3 |
| STOM     | 7.49369<br>1 | 7.70174<br>5 | 7.38052<br>1 | 6.70105<br>8 | 6.71204<br>1 | 7.07573<br>7 | TROAP    | 3.55478<br>1 | 3.44838<br>2 | 4.86092<br>8 | 5.20817<br>5 | 5.01<br>9    | 4.47568<br>6 |
| CLINT1   | 7.04327<br>7 | 6.96333<br>9 | 6.83654<br>1 | 6.26455<br>5 | 6.13191<br>7 | 6.38774<br>1 | NEK2     | 3.21630<br>4 | 3.11614<br>9 | 4.01604<br>6 | 5.37163<br>1 | 4.86631<br>2 | 4.52205<br>2 |
| HERC1    | 9.41213<br>4 | 9.46879<br>5 | 9.22496<br>2 | 8.87740<br>9 | 8.65642<br>6 | 9.00924<br>1 | ALKBH2   | 0.45974<br>5 | 0.17974<br>5 | 1.30827<br>3 | 2.81390<br>9 | 2.70836<br>9 | 2.07904<br>3 |
| STARD3NL | 6.12749<br>5 | 5.95601<br>9 | 5.60854<br>3 | 5.35218<br>4 | 5.01620<br>3 | 5.49873<br>3 | KIF4A    | 4.55416<br>7 | 4.65479<br>3 | 5.41362<br>7 | 5.93048<br>7 | 6.05567<br>6 | 5.48942<br>8 |
| APOL6    | 8.93064<br>2 | 8.65137<br>9 | 8.36557<br>2 | 8.13193<br>6 | 7.65844<br>6 | 8.19425<br>7 | TPX2     | 6.64313<br>2 | 6.75847<br>4 | 7.05297<br>2 | 7.48584<br>4 | 7.57791<br>2 | 7.25528<br>5 |
| ATP8A1   | 8.40461<br>8 | 8.21840<br>3 | 8.03494<br>1 | 7.82608<br>6 | 7.56315<br>9 | 7.86516<br>4 | CDC20    | 2.98709<br>9 | 3.11614<br>9 | 4.29311<br>8 | 5.07215<br>2 | 4.95939<br>6 | 4.07648<br>7 |
| SAMHD1   | 7.25150<br>4 | 7.13118<br>9 | 6.92379<br>3 | 6.68041<br>3 | 5.83130<br>5 | 6.56209<br>2 | DNPH1    | 3.45053<br>7 | 3.62755<br>1 | 4.29311<br>8 | 5.17903<br>6 | 4.80314<br>9 | 4.39823<br>7 |
| DDHD1    | 7.14419<br>9 | 7.10621<br>6 | 6.87914<br>8 | 6.62746<br>9 | 5.96558<br>3 | 6.87954<br>4 | GIT1     | 5.68215<br>8 | 5.60306<br>7 | 6.67568<br>4 | 6.90389<br>8 | 6.36363<br>5 | 6.72160<br>6 |
| TGFB1    | 6.12749<br>5 | 7.12457<br>2 | 7.04551<br>7 | 6.27835<br>9 | 5.83481<br>9 | 6.18362<br>6 | FOXK2    | 4.90912<br>8 | 5.20547<br>8 | 6.01537<br>7 | 6.12637<br>7 | 5.74803<br>7 | 6.08822<br>8 |
| BIN2     | 6.79275<br>4 | 7.55689<br>2 | 7.04999<br>2 | 6.65418<br>4 | 6.56746<br>5 | 6.60580<br>9 | BCL2L1   | 2.30014<br>6 | 2.64730<br>3 | 3.71857<br>1 | 4.27891<br>7 | 3.32293<br>9 | 4.06399<br>6 |
| ZBTB21   | 6.57452<br>3 | 6.77758<br>1 | 6.63250<br>2 | 6.36500<br>3 | 6.12619<br>3 | 6.10963<br>6 | KLHL17   | 2.37799<br>4 | 2.22067<br>6 | 3.11146<br>1 | 3.79378<br>7 | 3.30278<br>1 | 3.72652<br>8 |
| DHX16    | 5.67446<br>5 | 6.03224<br>2 | 5.79098<br>3 | 5.46512<br>1 | 5.29659<br>7 | 5.14878<br>8 | SPRYD3   | 2.37799<br>4 | 2.49144<br>7 | 3.43762<br>4 | 4.26511<br>8 | 3.47479<br>8 | 3.97345<br>8 |
| SIRT1    | 5.03461<br>9 | 5.26686<br>2 | 5.17183<br>7 | 4.39750<br>3 | 4.52723<br>7 | 4.54019<br>2 | ZDHHC16  | 3.17328<br>3 | 3.14259<br>1 | 4.09913<br>7 | 4.50707<br>7 | 4.02282<br>4 | 4.44712<br>4 |
| CASB     | 5.26721<br>4 | 5.44207<br>8 | 5.12727<br>7 | 4.61979<br>7 | 4.44685<br>4 | 4.54917<br>7 | BIRC5    | 4.85570<br>7 | 5.18654<br>1 | 5.60448<br>3 | 6.00294<br>5 | 5.69101<br>8 | 5.74147<br>5 |
| CYP20A1  | 5.61139<br>9 | 5.90287<br>8 | 5.68738<br>7 | 5.22252<br>6 | 5.1576<br>7  | 5.14878<br>8 | TMEM141  | 1.45449<br>1 | 1.61225<br>9 | 2.80699<br>9 | 3.95717<br>5 | 2.85400<br>8 | 2.89201<br>4 |
|          |              |              |              |              |              |              | H2AC20   | 6.91531<br>4 | 6.99995<br>4 | 7.12838<br>1 | 7.84939<br>3 | 7.16289<br>9 | 7.69243<br>3 |
|          |              |              |              |              |              |              | TBC1D10B | 4.92218<br>2 | 5.00390<br>3 | 5.31278<br>3 | 5.95647<br>8 | 5.43730<br>7 | 5.57355<br>7 |
|          |              |              |              |              |              |              | H2AC16   | 8.68956<br>6 | 8.71773<br>3 | 8.99129<br>7 | 10.2012<br>4 | 9.56706<br>8 | 9.38477<br>8 |
|          |              |              |              |              |              |              | H2AC21   | 4.80023<br>2 | 4.92992<br>6 | 5.20436<br>5 | 6.20436<br>9 | 5.30675<br>4 | 5.53536<br>7 |
|          |              |              |              |              |              |              | HELLS    | 6.57452<br>3 | 6.77335<br>6 | 6.66208<br>4 | 7.13767<br>8 | 7.53751<br>1 | 7.57856<br>6 |

|          |              |              |              |              |              |              |
|----------|--------------|--------------|--------------|--------------|--------------|--------------|
| VRK1     | 4.98572<br>5 | 5.08794<br>1 | 5.14972<br>6 | 5.52424<br>3 | 5.58232<br>5 | 5.88677<br>2 |
| DLGAP5   | 5.02255<br>8 | 5.17377<br>8 | 5.27243<br>6 | 6.34874<br>3 | 6.14046<br>1 | 5.76094<br>1 |
| ANLN     | 5.80702<br>6 | 5.83962<br>9 | 5.98760<br>7 | 6.60025<br>4 | 6.54833<br>6 | 6.28660<br>7 |
| GEN1     | 4.82823<br>6 | 4.88364<br>7 | 4.90777<br>9 | 5.80259<br>1 | 5.94946<br>6 | 5.50797<br>9 |
| GNG3     | -<br>6.64386 | -<br>6.64386 | -<br>6.64386 | 0.57365<br>4 | 0.48385<br>3 | -<br>0.75775 |
| AFMID    | 2.37799<br>4 | 2.36240<br>5 | 2.04290<br>7 | 3.77443<br>6 | 3.19753<br>9 | 3.44778<br>5 |
| WDR46    | 3.77220<br>1 | 3.93039<br>9 | 3.76293<br>1 | 4.59794<br>7 | 4.43764<br>4 | 4.64448<br>5 |
| H2AC13   | 6.65490<br>8 | 6.82732<br>9 | 6.95758<br>6 | 8.17592<br>5 | 7.51469<br>5 | 7.80548<br>6 |
| H4C8     | 5.72747<br>3 | 5.87554<br>2 | 5.92391<br>2 | 6.67520<br>5 | 6.38775<br>8 | 6.41010<br>6 |
| ASPM     | 7.04626<br>1 | 7.04270<br>1 | 7.17563<br>8 | 7.80716<br>6 | 7.66042<br>8 | 7.70756<br>1 |
| MAST1    | -<br>6.64386 | -<br>6.64386 | -<br>6.64386 | 0.57365<br>4 | -<br>0.24625 | -<br>0.03910 |
| CUX2     | -<br>6.64386 | -<br>6.64386 | -<br>6.64386 | 0.38239<br>3 | -<br>0.82268 | -<br>0.22999 |
| NCAPG    | 5.51130<br>9 | 5.59829<br>9 | 5.69884<br>3 | 6.19348<br>2 | 6.50708<br>1 | 6.10049<br>7 |
| RRP9     | 1.93841<br>2 | 1.75619<br>1 | 2.26479<br>9 | 3.08918<br>6 | 3.66050<br>7 | 2.77434<br>3 |
| PLEKHF1  | 1.93841<br>2 | 2.26948<br>3 | 2.74936<br>8 | 3.54244<br>7 | 3.72252<br>2 | 3.42843<br>8 |
| CDCA8    | 3.80074<br>9 | 4.29107<br>1 | 4.59254<br>1 | 5.28539<br>7 | 5.47832<br>5 | 4.84019<br>9 |
| GTSE1    | 4.63566<br>3 | 4.89146<br>4 | 4.92740<br>1 | 5.51843<br>9 | 5.60307<br>9 | 5.30547<br>1 |
| RRM2     | 6.99158<br>8 | 7.33123<br>8 | 7.83647<br>8 | 8.05383<br>2 | 8.70811<br>2 | 8.19568<br>8 |
| SNRNP25  | 3.25808<br>9 | 3.86837<br>9 | 4.23131<br>1 | 4.73439<br>5 | 5.49618<br>7 | 4.68581<br>7 |
| RANBP1   | 5.32732<br>7 | 5.61727<br>8 | 5.85727<br>4 | 6.23300<br>5 | 6.85213<br>6 | 6.34452<br>6 |
| KIF11    | 6.04039<br>7 | 6.18634<br>3 | 6.35185<br>6 | 6.58644<br>6 | 7.05405<br>5 | 6.75305<br>3 |
| BCL2L12  | 2.30014<br>6 | 2.64730<br>3 | 2.96724<br>7 | 3.37267<br>6 | 4.12967<br>6 | 3.66172<br>7 |
| BRCA1    | 4.81430<br>2 | 4.97476<br>5 | 5.16633<br>6 | 5.54723<br>9 | 6.31665<br>9 | 5.76865<br>5 |
| CEP55    | 4.08233<br>6 | 4.34898<br>9 | 4.41858<br>8 | 4.93072<br>3 | 5.65965<br>1 | 5.00599<br>5 |
| FANCI    | 5.61943<br>5 | 6.14770<br>3 | 5.90093<br>7 | 6.54136<br>3 | 6.99874<br>2 | 6.54197<br>9 |
| PARK7    | 7.36816<br>7 | 7.65887<br>6 | 7.64235<br>8 | 8.30037<br>6 | 8.40605<br>2 | 8.35915<br>6 |
| NUF2     | 3.48612<br>8 | 3.85244<br>9 | 3.79176<br>5 | 4.65196<br>5 | 5.01<br>1    | 4.80312<br>3 |
| ESPL1    | 4.46779<br>3 | 5.03246<br>3 | 5.39494<br>9 | 6.35526<br>7 | 6.01598<br>1 | 5.30547<br>1 |
| KIF2C    | 3.65199<br>8 | 4.31451<br>8 | 4.54252<br>1 | 5.66224<br>5 | 5.41869<br>5 | 4.92547<br>7 |
| ISCA2    | 2.13058<br>7 | 3.00525<br>1 | 3.17849<br>9 | 4.33282<br>8 | 3.81081<br>1 | 3.46687<br>6 |
| NUDT1    | 4.60361<br>5 | 5.24262<br>1 | 5.11020<br>9 | 6.17883<br>7 | 5.96558<br>3 | 5.67325<br>3 |
| BANF1    | 4.61972<br>8 | 5.19919<br>3 | 5.08130<br>4 | 5.70886<br>2 | 5.69488<br>2 | 5.28947<br>5 |
| KIF20A   | 3.17328<br>3 | 4.43707<br>8 | 4.17770<br>3 | 5.19367<br>9 | 5.34668<br>3 | 4.45670<br>5 |
| CENPO    | 3.21630<br>4 | 4.38265<br>6 | 4.16673<br>7 | 4.95671<br>7 | 5.04682<br>6 | 4.43747<br>8 |
| UQCC2    | 2.77325<br>6 | 3.78690<br>7 | 3.60942<br>7 | 4.33282<br>8 | 4.61159<br>3 | 4.16096<br>5 |
| TNFRSF8  | -<br>6.64386 | -<br>1.02576 | -<br>2.76587 | 1.56879<br>9 | 1.15805<br>1 | 0.22999<br>7 |
| MT-ND6   | 8.98762<br>8 | 9.54325<br>1 | 9.54324<br>7 | 9.19194<br>2 | 9.73514<br>1 | 10.5791<br>9 |
| RAD51AP1 | 3.96110<br>5 | 3.88413<br>6 | 4.33289<br>9 | 4.53033<br>7 | 4.85942<br>8 | 5.84725<br>1 |
| DSN1     | 5.08191<br>1 | 4.88364<br>7 | 5.35686<br>5 | 5.31917<br>7 | 5.65568<br>3 | 6.25949<br>1 |
| ZNF367   | 3.80074<br>9 | 3.83634<br>9 | 4.00377<br>5 | 3.97423<br>7 | 4.88676<br>9 | 4.99945<br>4 |
| MRPL13   | 4.41336<br>8 | 4.36029<br>9 | 4.44605<br>6 | 4.55322<br>7 | 5.08273<br>5 | 5.55334<br>1 |

|          |              |              |              |              |              |              |
|----------|--------------|--------------|--------------|--------------|--------------|--------------|
| PAICS    | 5.40375<br>3 | 5.73490<br>7 | 6.47029<br>6 | 6.17145<br>8 | 7.51687<br>9 | 7.37760<br>2 |
| MRPL3    | 4.23657<br>8 | 4.20586<br>9 | 4.84037<br>4 | 4.6306       | 5.44652<br>3 | 5.70977<br>2 |
| ATAD5    | 5.61139<br>9 | 5.66366<br>2 | 5.92065<br>2 | 5.85879<br>7 | 6.42086<br>6 | 6.50320<br>5 |
| SLC7A1   | 5.24660<br>9 | 5.51473      | 6.16613<br>5 | 6.23654<br>5 | 6.76272<br>9 | 6.74329<br>9 |
| VCL      | 3.80074<br>9 | 3.94549<br>6 | 4.59254<br>1 | 4.74437<br>5 | 5.11777<br>1 | 5.20671<br>9 |
| RPL26L1  | 3.25808      | 3.55065<br>3 | 4.21010<br>6 | 4.22291<br>2 | 4.57003<br>1 | 4.68581      |
| REV1     | 5.51992      | 5.60306<br>7 | 6.06346<br>4 | 6.02767<br>4 | 6.24451<br>9 | 6.38020<br>8 |
| SMC2     | 6.59504<br>3 | 6.66352      | 7.26831<br>4 | 7.09736<br>3 | 7.58627<br>5 | 7.96337<br>6 |
| BRI3BP   | 1.30307<br>2 | 1.45234<br>1 | 2.18009<br>2 | 2.52064<br>1 | 3.03597<br>4 | 3.61114<br>2 |
| RRP15    | 3.58792      | 4.42635<br>7 | 4.34267<br>6 | 4.38479<br>8 | 5.20724<br>4 | 5.55334<br>1 |
| ORC6     | 3.21630<br>4 | 4.31451<br>8 | 4.14455<br>4 | 4.17943<br>4 | 4.94645<br>5 | 5.38791<br>3 |
| BCCIP    | 4.65142<br>4 | 5.43139<br>3 | 5.66417<br>7 | 5.46512<br>1 | 6.09429<br>7 | 6.28660<br>7 |
| ECM2     | 3.45053<br>7 | 4.15482<br>3 | 4.28299<br>9 | 4.23711<br>9 | 4.85251<br>1 | 4.94603<br>2 |
| UBR7     | 4.29794<br>7 | 4.60811<br>6 | 4.82650<br>6 | 4.90426      | 5.04075<br>3 | 5.5578       |
| NHP2     | 0.94217<br>1 | 1.82311<br>1 | 2.88934<br>7 | 2.69544      | 2.85400<br>8 | 3.87683<br>7 |
| SIVA1    | 5.20449<br>5 | 5.72181<br>4 | 6.1907       | 6.27147<br>4 | 6.35631<br>9 | 6.81209<br>7 |
| CENPW    | 2.13058<br>7 | 2.75405<br>4 | 3.64146<br>2 | 3.71477<br>4 | 3.92070<br>9 | 4.76506<br>9 |
| GAPDH    | 9.10459<br>4 | 10.2604<br>8 | 10.7597<br>1 | 10.1779<br>6 | 10.6279<br>5 | 11.0237      |
| PHB      | 3.41404<br>5 | 5.23649<br>6 | 5.81224<br>8 | 5.41601<br>5 | 5.75546<br>5 | 6.21219<br>2 |
| CCT7     | 5.44954<br>7 | 6.20528<br>2 | 6.49899<br>3 | 6.30220<br>3 | 6.60704<br>7 | 6.71563<br>3 |
| NUDT21   | 6.07586<br>9 | 6.71948<br>3 | 7.09261<br>9 | 6.85867<br>3 | 7.28223<br>5 | 7.40260<br>4 |
| MRPL51   | 5.49393<br>1 | 6.23015<br>4 | 6.6968       | 6.24359<br>9 | 6.80275<br>2 | 7.02188<br>6 |
| SLC25A5  | 6.48059<br>7 | 7.31097<br>2 | 7.42146<br>1 | 7.13388<br>6 | 7.68107<br>2 | 7.87591<br>6 |
| TIMM13   | 1.59151<br>5 | 4.00435<br>2 | 4.28299<br>9 | 3.60950<br>5 | 5.10618<br>7 | 5.04462<br>9 |
| SSRP1    | 4.84203<br>7 | 6.07061<br>8 | 6.10713<br>5 | 5.75895<br>1 | 6.51147<br>9 | 6.58192<br>9 |
| PA2G4    | 5.42224<br>6 | 6.19584<br>4 | 6.91399      | 6.09941<br>4 | 6.81347<br>8 | 7.04747<br>5 |
| TPH1     | 6.24122<br>1 | 6.89693<br>6 | 7.99675<br>4 | 7.05989<br>1 | 7.63142<br>4 | 8.40070<br>1 |
| CPT1A    | 4.10540<br>7 | 4.96738<br>8 | 5.49477<br>5 | 4.86820<br>3 | 5.52692<br>4 | 6.11267      |
| PCLAF    | 2.65314<br>6 | 2.85344<br>7 | 4.17770<br>3 | 3.63118<br>2 | 4.20763<br>5 | 4.53115<br>1 |
| XRCC5    | 7.66457<br>8 | 7.93897<br>1 | 8.48790<br>2 | 8.20150<br>8 | 8.38283<br>6 | 8.92027<br>9 |
| GOLIM4   | 6.08750<br>2 | 6.45779<br>3 | 7.40289<br>2 | 6.95206<br>2 | 7.39839<br>8 | 7.87859<br>2 |
| CMSS1    | 2.71445<br>1 | 3.16855<br>7 | 4.11062<br>6 | 3.77443<br>6 | 4.25036<br>2 | 4.91856      |
| TST      | -<br>6.64386 | -<br>6.64386 | 2.99230<br>6 | 1.65597<br>6 | 1.54882<br>8 | 2.46818<br>1 |
| PPP1R14B | 0.94217<br>1 | 1.45234<br>1 | 3.92787<br>5 | 3.26586<br>8 | 2.98628<br>3 | 4.36808<br>9 |
| PRPSA1   | 3.90960<br>8 | 3.78690<br>7 | 5.03984      | 4.82182<br>6 | 4.78145<br>3 | 5.29482<br>7 |
| SKA1     | 5.02255      | 5.12819<br>4 | 6.24122<br>6 | 6.21158<br>1 | 6.25242<br>3 | 6.69958<br>2 |
| COPRS    | 0.72103      | 0.69049      | 3.06497<br>3 | 2.81390<br>9 | 2.90838<br>2 | 3.87683<br>7 |
| LMNB2    | 3.52086<br>3 | 4.57936<br>9 | 5.86407<br>8 | 5.20817<br>5 | 5.90669<br>9 | 5.52173<br>8 |
| ADCY3    | 3.85620<br>5 | 4.68208<br>7 | 5.71021<br>5 | 5.56423<br>3 | 5.57813<br>8 | 5.44197<br>7 |
| CD82     | 4.96064<br>2 | 5.46321<br>1 | 6.44555<br>9 | 6.10716<br>9 | 6.19342<br>8 | 6.59500<br>3 |
| FAH      | -<br>0.84653 | 0.95203<br>6 | 3.06497<br>3 | 2.81390<br>9 | 2.54636<br>1 | 3.69449<br>2 |

|              |              |              |              |              |              |              |
|--------------|--------------|--------------|--------------|--------------|--------------|--------------|
| TUBA1B       | 6.71238<br>8 | 7.62293<br>9 | 8.39582<br>3 | 8.22842<br>3 | 8.04568<br>6 | 8.38948<br>9 |
| GID8         | 4.77167<br>3 | 5.59829<br>9 | 6.62851<br>2 | 6.08770<br>2 | 6.22322<br>7 | 6.47283<br>5 |
| CDT1         | 2.58911<br>9 | 2.36240<br>5 | 4.31314<br>6 | 3.63118<br>2 | 4.93340<br>3 | 4.36808<br>9 |
| ASF1B        | 2.52211<br>9 | 2.57147<br>9 | 4.38113<br>1 | 3.37267<br>6 | 4.84556<br>3 | 4.30583<br>6 |
| TUBB         | 8.22536<br>9 | 8.15487<br>5 | 9.38431<br>1 | 9.18783<br>4 | 9.54605<br>3 | 9.18957<br>1 |
| NUTF2        | 5.26721<br>4 | 5.40433<br>1 | 6.07523<br>9 | 6.03582<br>3 | 6.40440<br>7 | 5.98605<br>5 |
| MRPL4        | 2.45185<br>6 | 2.31669<br>2 | 3.67280<br>1 | 3.60950<br>5 | 4.46510<br>8 | 3.54081<br>2 |
| KIF23        | 5.77860<br>3 | 5.93348<br>3 | 6.98905<br>3 | 6.87239<br>3 | 7.11890<br>1 | 6.98759<br>5 |
| CLUH         | 2.45185<br>6 | 2.97614<br>1 | 4.34267<br>6 | 4.30612<br>4 | 4.76681<br>1 | 4.38825<br>8 |
| ORC1         | 2.77325<br>6 | 3.06176<br>5 | 4.30316<br>7 | 4.35904<br>7 | 5.22877<br>2 | 4.84750<br>1 |
| UHRF1BP<br>1 | 3.93558<br>6 | 3.89972<br>2 | 5.04583<br>7 | 5.12658<br>3 | 5.46023<br>8 | 5.27871<br>1 |
| MANF         | 4.55416<br>7 | 4.63630<br>1 | 5.52942<br>8 | 5.52424<br>3 | 5.88990<br>7 | 5.77632<br>7 |
| SHMT2        | 3.80074<br>9 | 5.05351<br>8 | 5.91411<br>8 | 5.9693<br>8  | 6.31917<br>3 | 6.36502<br>3 |
| HNRNPAB      | 6.51546<br>3 | 7.06187<br>7 | 7.54833<br>7 | 7.46638<br>5 | 7.69757<br>1 | 7.67201<br>4 |
| TCF19        | 4.23657<br>8 | 4.90697<br>2 | 5.71398<br>6 | 5.58103<br>8 | 5.73680<br>4 | 5.96941<br>8 |
| HMGB3        | 3.48612<br>8 | 4.14177<br>4 | 4.87447<br>4 | 4.88634<br>4 | 5.10035<br>9 | 5.20671<br>9 |
| CHTF18       | 2.21785<br>6 | 3.08921<br>3 | 4.00377<br>5 | 4.29258<br>5 | 4.49206<br>3 | 4.39823<br>7 |
| TMEM223      | 1.59151<br>5 | 2.26948<br>3 | 3.22152<br>1 | 3.49594<br>5 | 3.62847<br>2 | 3.59387<br>8 |
| ELP5         | 3.65199<br>8 | 3.96043<br>7 | 4.84725<br>8 | 4.9481<br>8  | 5.23941<br>6 | 5.14286<br>4 |
| CCNB2        | 4.17248<br>3 | 4.58901<br>5 | 5.26731<br>2 | 5.49498<br>5 | 5.59895<br>2 | 5.69365<br>6 |
| UBAC1        | 3.12893<br>8 | 3.42702<br>8 | 4.13333<br>3 | 4.34599<br>7 | 4.40018<br>2 | 4.46622<br>4 |
| EXO1         | 3.12893<br>8 | 3.78690<br>7 | 4.48188<br>5 | 4.45940<br>2 | 5.09450<br>8 | 5.32652<br>8 |
| PPIA         | 8.56299<br>7 | 9.01426<br>1 | 9.35079<br>4 | 9.22973<br>2 | 9.67613<br>1 | 9.79744<br>7 |
| HADH         | 3.90960<br>8 | 4.48952<br>2 | 4.98471<br>6 | 4.77390<br>9 | 5.35159<br>7 | 5.46114<br>5 |
| TALDO1       | 4.53730<br>1 | 5.08794<br>1 | 5.64059<br>5 | 5.61407<br>1 | 6.06766<br>6 | 6.02199<br>7 |
| CHAF1B       | 3.03593<br>9 | 3.64615<br>2 | 4.38113<br>1 | 4.47146<br>9 | 5.39984<br>1 | 5.28410<br>3 |
| STMN1        | 6.38955<br>5 | 6.77335<br>6 | 7.16741<br>6 | 7.22045<br>3 | 7.62940<br>3 | 7.66169<br>4 |
| CDCA5        | 3.85620<br>5 | 4.70000<br>2 | 5.91082<br>8 | 5.26474<br>3 | 6.57798<br>7 | 6.13073<br>9 |
| MCM4         | 5.07023<br>2 | 5.98918<br>2 | 6.50553<br>5 | 6.53849<br>8 | 7.28480<br>6 | 7.09886<br>3 |
| DTL          | 5.65113<br>7 | 6.32267<br>3 | 6.78906<br>6 | 6.80723<br>1 | 7.41139<br>9 | 7.07728<br>5 |
| CLN6         | 2.65314<br>6 | 3.44838<br>2 | 3.86142<br>4 | 3.90474<br>2 | 4.65199<br>1 | 4.25182<br>4 |
| TMEM106<br>C | 4.19416<br>6 | 4.20586<br>9 | 4.94676<br>9 | 5.0401<br>9  | 5.90669<br>9 | 5.55334<br>1 |
| ARL13B       | 3.37660<br>5 | 3.51061<br>5 | 4.18858<br>5 | 4.04053<br>8 | 4.95939<br>8 | 4.60194<br>2 |
| NCAPD3       | 6.24641<br>9 | 6.17997<br>5 | 6.58593<br>2 | 6.79287<br>7 | 7.03737<br>8 | 6.88487<br>7 |
| SLC43A3      | 4.19416<br>6 | 4.15482<br>3 | 4.93388<br>3 | 5.09573<br>1 | 5.54419<br>8 | 5.11287<br>8 |
| NCAPG2       | 5.75691<br>2 | 5.99281<br>8 | 6.13553<br>1 | 6.54992<br>4 | 6.70053<br>2 | 6.74134<br>2 |
| UBE2T        | 3.85620<br>5 | 4.18057<br>1 | 4.40931<br>4 | 4.93072<br>3 | 5.08273<br>5 | 5.08843<br>2 |
| NDUFS8       | 4.90912<br>8 | 5.34863<br>5 | 5.69884<br>3 | 5.98200<br>9 | 6.17136<br>2 | 6.22626<br>5 |
| MTLN         | 2.21785<br>6 | 2.57147<br>9 | 3.11146<br>1 | 3.60950<br>5 | 3.75255<br>5 | 3.71059<br>9 |
| TOP2A        | 6.97289<br>3 | 6.90081<br>4 | 7.73063<br>1 | 7.99757<br>7 | 8.06301<br>7 | 8.27568<br>2 |
| DTYMK        | 4.99810<br>4 | 4.96738<br>8 | 5.38078<br>5 | 5.80259<br>1 | 5.86262<br>6 | 5.86894<br>2 |

|          |              |              |              |              |              |              |
|----------|--------------|--------------|--------------|--------------|--------------|--------------|
| HIRIP3   | 4.01082<br>7 | 4.73517<br>8 | 4.98471<br>6 | 4.79326<br>7 | 6.26810<br>3 | 4.78802<br>1 |
| E2F8     | 3.65199<br>8 | 4.36029<br>9 | 4.23131<br>1 | 4.75428<br>7 | 5.79928<br>9 | 4.39823<br>7 |
| DNMT1    | 7.49150<br>3 | 7.63229<br>9 | 7.79791<br>2 | 8.03362<br>5 | 8.52773<br>6 | 7.82133<br>4 |
| PP1F     | 5.05845<br>9 | 5.70416<br>9 | 6.27990<br>2 | 5.51843<br>9 | 6.91987<br>5 | 6.56209<br>2 |
| MTSS1    | 5.34681<br>1 | 5.66821<br>9 | 5.93040<br>9 | 5.62491<br>6 | 6.85732<br>8 | 6.40020<br>9 |
| MTHFD1L  | 3.71335<br>1 | 4.60811<br>6 | 5.09871<br>6 | 4.55322<br>7 | 5.90669<br>9 | 5.03186<br>6 |
| ANP32B   | 6.81391<br>7 | 7.89006<br>4 | 7.99830<br>1 | 7.90049<br>5 | 8.72098<br>7 | 7.94051      |
| PDIA4    | 4.55416<br>7 | 5.50457<br>3 | 5.65635<br>9 | 5.50088<br>5 | 6.32917<br>5 | 5.83628<br>2 |
| DUT      | 4.93511<br>5 | 5.35994<br>8 | 5.54221<br>2 | 5.70375<br>6 | 6.24451<br>9 | 6.05391<br>1 |
| WDR12    | 3.12893<br>8 | 3.73571<br>9 | 3.82003<br>3 | 4.14970<br>4 | 4.80314<br>4 | 4.45670<br>5 |
| TK1      | 3.52086<br>3 | 4.47918<br>5 | 4.62494<br>9 | 4.93943<br>8 | 5.56972<br>8 | 5.23483<br>5 |
| STIL     | 5.28752<br>9 | 5.72619<br>1 | 5.88764<br>2 | 6.06796<br>9 | 6.43250<br>9 | 6.16328<br>9 |
| CKAP2L   | 4.80023<br>2 | 5.38231      | 5.42286<br>6 | 5.65697<br>1 | 6.65156<br>1 | 6.12173<br>3 |
| POLA1    | 5.18296<br>8 | 5.92968<br>9 | 5.85386      | 6.20074<br>9 | 6.79915<br>9 | 6.44422<br>1 |
| WDR34    | 1.71664<br>7 | 2.97614<br>1 | 3.04115<br>5 | 3.05751<br>5 | 4.45601<br>5 | 4.16096<br>5 |
| PRDX3    | 4.57083<br>9 | 5.26686<br>2 | 5.39494<br>9 | 5.45300<br>1 | 6.04053<br>4 | 5.92868<br>7 |
| CENPJ    | 3.58792      | 4.77797<br>5 | 4.96586<br>3 | 4.68343<br>1 | 5.78845<br>7 | 5.55334<br>1 |
| BRIP1    | 4.37591<br>1 | 5.08112<br>2 | 5.27243<br>6 | 5.11893<br>2 | 5.87633<br>1 | 5.60164<br>5 |
| PSMD4    | 4.81430<br>2 | 5.66821<br>9 | 6.04262<br>3 | 5.74907<br>2 | 6.62136<br>2 | 6.48224<br>8 |
| CLSPN    | 4.88266<br>5 | 5.67729<br>1 | 6.02755      | 5.84495      | 6.79736      | 6.67721<br>6 |
| DKC1     | 4.94793<br>5 | 5.60306<br>7 | 5.92391<br>2 | 5.70886<br>2 | 6.53543<br>1 | 6.32634<br>8 |
| MCM10    | 2.82975<br>9 | 4.00435<br>2 | 4.38113<br>1 | 4.51875<br>4 | 5.84878<br>9 | 4.86918<br>9 |
| MCM3     | 5.55386      | 6.03577<br>4 | 6.39946<br>8 | 6.44673<br>6 | 7.31405<br>3 | 6.87776<br>2 |
| PKM      | 7.42658      | 7.89881<br>6 | 8.36317<br>6 | 8.14800<br>2 | 9.20212<br>5 | 8.67043<br>5 |
| FGGY     | 2.58911<br>9 | 3.26798<br>6 | 3.47366      | 4.04053<br>8 | 3.81081<br>1 | 4.18422<br>2 |
| DGCR8    | 4.6977       | 5.00390<br>2 | 5.05180<br>9 | 5.56423<br>3 | 5.41869<br>5 | 5.83994<br>7 |
| PARP2    | 4.50296<br>4 | 4.88364<br>7 | 4.81952<br>3 | 5.40975<br>7 | 5.18539<br>1 | 5.54886<br>9 |
| PRDX5    | 5.31747<br>5 | 6.46304<br>8 | 6.11571<br>3 | 6.53275<br>1 | 6.33662<br>5 | 6.89019      |
| MRPL11   | 2.52211<br>9 | 4.14177<br>4 | 4.02821<br>3 | 4.73439<br>5 | 4.27126<br>5 | 4.90462<br>6 |
| MCUR1    | 2.45185<br>6 | 4.06090<br>1 | 4.30316<br>7 | 4.49530<br>5 | 4.34210<br>7 | 4.86199<br>6 |
| PSMB3    | 4.55416<br>7 | 5.89899<br>7 | 5.99071<br>9 | 6.20074<br>9 | 6.34896<br>5 | 6.13073<br>9 |
| SLCO4A1  | 1.71664<br>7 | 4.01869<br>8 | 4.06411<br>1 | 4.19407<br>3 | 4.59511<br>2 | 4.43747<br>8 |
| PIMREG   | -<br>6.64386 | 1.17336<br>2 | 1.66064<br>3 | 2.15214      | 2.67739      | 2.12783<br>9 |
| PARD6A   | -<br>1.82082 | 1.27247<br>2 | 1.94362<br>1 | 2.77549      | 3.19753<br>9 | 2.97436<br>8 |
| CAND2    | -<br>6.64386 | -<br>1.02576 | -<br>0.04517 | 1.73818<br>4 | 1.96263<br>2 | 1.47078<br>5 |
| EBNA1BP2 | 2.77325<br>2 | 4.92231<br>5 | 4.74038<br>1 | 5.21536<br>8 | 5.83130<br>5 | 5.45159<br>3 |
| CDC45    | 1.59151<br>5 | 4.48952<br>2 | 4.40931<br>4 | 4.85904<br>6 | 5.43267<br>6 | 5.46589<br>7 |
| ITGB1BP2 | -<br>6.64386 | 0.69049<br>2 | 0.14561<br>2 | 1.27036<br>1 | 2.47609<br>5 | 2.17503<br>8 |
| CIT      | 4.23657<br>8 | 5.77348<br>8 | 5.88094<br>9 | 6.45891      | 6.39253<br>4 | 5.81781<br>2 |
| STAC     | -<br>6.64386 | -<br>1.59611 | 0.84102<br>7 | 2.02690<br>4 | 1.67964<br>4 | 1.39307<br>2 |
| C19orf53 | 5.43140<br>3 | 6.29641<br>8 | 6.58181      | 6.82379<br>9 | 6.77558<br>5 | 6.53972<br>7 |



|               |              |              |              |              |              |              |
|---------------|--------------|--------------|--------------|--------------|--------------|--------------|
| PRR11         | 4.21552<br>8 | 5.00390<br>2 | 5.29778<br>5 | 5.61950<br>4 | 5.56126<br>8 | 5.29482<br>7 |
| CDC25A        | -<br>0.27024 | 2.60988<br>9 | 3.13415<br>5 | 4.58689<br>6 | 5.03465<br>5 | 4.06399<br>6 |
| MYO7A         | 7.03128      | 7.83031<br>9 | 7.92291<br>9 | 8.40710<br>6 | 8.41664<br>3 | 8.06632      |
| ACADVL        | 6.27213<br>3 | 6.83950<br>3 | 6.87914<br>8 | 7.23821<br>6 | 7.22848<br>3 | 7.06480<br>9 |
| FHOD1         | 3.45053<br>7 | 4.25517<br>3 | 4.53401<br>3 | 4.99900<br>7 | 4.94645<br>5 | 4.93236<br>2 |
| POLD3         | 4.6977       | 5.65909      | 5.94010<br>1 | 6.48593      | 6.23657<br>1 | 6.18650<br>8 |
| HAUS8         | 3.71335<br>1 | 4.69107<br>2 | 4.83345<br>7 | 5.48906<br>2 | 5.34668<br>3 | 5.23483<br>5 |
| FEN1          | 3.74307<br>6 | 4.99667<br>3 | 5.76213<br>3 | 5.22252<br>6 | 6.16858      | 5.89736<br>6 |
| NOLC1         | 5.55386      | 6.51204      | 6.83481      | 6.54422      | 7.10150<br>2 | 6.74915<br>3 |
| POLE          | 4.90912<br>8 | 6.43390<br>5 | 6.42959<br>5 | 6.34874      | 6.98773<br>5 | 6.44422<br>1 |
| PSMC3         | 4.41336<br>8 | 5.97453<br>6 | 6.04262<br>3 | 5.97354<br>9 | 6.50045<br>9 | 6.09743<br>7 |
| FBL           | 5.68981      | 6.91813<br>7 | 6.97183      | 6.88372<br>2 | 7.39364<br>2 | 7.25391<br>2 |
| MYBL2         | 2.30014<br>6 | 4.85993<br>9 | 5.45926<br>8 | 5.14176<br>6 | 6.11467<br>6 | 5.54438<br>2 |
| UCK2          | -<br>1.82082 | 2.94643<br>2 | 3.68821<br>9 | 3.29332<br>1 | 4.40018<br>2 | 4.06399<br>6 |
| CDC47L        | 0.14043<br>7 | 2.71934<br>1 | 3.32377<br>7 | 3.23788<br>3 | 4.27126      | 4.35789<br>9 |
| CDC6          | 3.77220<br>1 | 5.34294<br>6 | 5.54644<br>8 | 5.72910<br>7 | 6.19068<br>8 | 6.22626<br>5 |
| SHCBP1        | 3.52086<br>3 | 4.91466<br>4 | 5.18275<br>7 | 5.31917<br>7 | 5.86262<br>6 | 5.82892<br>2 |
| AVEN          | -<br>6.64386 | -<br>1.02576 | 1.78057<br>3 | 1.27036<br>1 | 2.01313<br>1 | 2.39032<br>3 |
| ARHGGEF4<br>0 | -<br>1.82082 | 1.17336<br>2 | 2.62670<br>2 | 2.56636<br>6 | 2.51165<br>5 | 2.80467<br>2 |
| WDR90         | -<br>0.27024 | 1.82311<br>1 | 2.99230<br>6 | 3.58749<br>6 | 3.32293<br>9 | 3.78854<br>4 |
| PANK1         | -<br>6.64386 | -<br>2.55314 | 0.46493      | 0.89364<br>2 | 0.74516<br>7 | 1.86546<br>4 |
| EIF5A         | 6.19357<br>5 | 6.85956<br>7 | 7.08244<br>4 | 7.16394<br>1 | 7.44971<br>7 | 7.04588<br>9 |
| E2F2          | 3.12893<br>8 | 4.55003<br>7 | 5.37603<br>2 | 5.22964<br>8 | 5.76654<br>6 | 5.21803<br>1 |
| SIGMAR1       | 3.33816<br>9 | 4.3261       | 4.97217<br>4 | 5.08791<br>4 | 5.40929<br>9 | 4.86199<br>6 |
| AURKA         | 4.08233<br>6 | 4.53014<br>6 | 5.12161      | 5.27854<br>5 | 5.73304<br>3 | 5.22365<br>4 |
| DDX41         | 4.17248<br>3 | 4.67304<br>5 | 5.03381<br>8 | 5.37805<br>6 | 5.60307<br>9 | 5.32129<br>2 |
| POLD2         | 2.21785<br>6 | 3.29180<br>8 | 4.00377<br>5 | 4.20856<br>5 | 4.75943<br>4 | 4.32688<br>7 |
| CENPN         | 4.41336<br>8 | 4.96738<br>8 | 5.17183      | 5.36517<br>8 | 5.62353<br>9 | 5.36774      |
| RPSA          | 8.60407<br>2 | 9.88145<br>8 | 9.34503      | 9.42154<br>1 | 9.77638<br>3 | 10.0822<br>3 |
| RPS2          | 8.86372<br>1 | 9.80100<br>1 | 9.47793<br>6 | 9.61311<br>4 | 9.91272<br>2 | 9.98956      |
| TRMT6         | 2.30014<br>6 | 4.06090<br>1 | 3.52608<br>1 | 4.00776<br>9 | 4.25036<br>2 | 4.55810<br>6 |
| RPLP0         | 7.77661      | 8.67534<br>8 | 8.46346<br>9 | 8.56255<br>7 | 9.0285       | 9.14136<br>8 |
| CCDC167       | 4.48548<br>4 | 5.47366<br>3 | 5.05180<br>9 | 5.31248<br>4 | 5.75546<br>5 | 5.62307<br>8 |
| PCNA          | 5.34681<br>1 | 6.46828<br>4 | 6.17983<br>4 | 6.01536<br>2 | 7.51469      | 7.00239<br>1 |
| SNRPC         | 4.15046<br>9 | 4.96738<br>8 | 4.80545<br>2 | 4.84055<br>6 | 5.54848<br>4 | 5.40780<br>8 |
| DDX55         | 4.53730<br>1 | 5.33723<br>3 | 5.08713<br>2 | 5.14176<br>6 | 5.84182<br>1 | 5.58863<br>1 |
| BATF          | 4.50296<br>4 | 6.48646<br>2 | 5.99382<br>4 | 5.53578<br>3 | 6.69087      | 6.50551<br>5 |
| MCM7          | 4.93511<br>5 | 6.41233<br>4 | 6.27224<br>9 | 6.00709<br>6 | 7.17265<br>1 | 6.66486<br>9 |
| YBX1          | 8.37169<br>6 | 9.37363<br>9 | 9.14131<br>5 | 8.96109<br>7 | 9.78957<br>1 | 9.59079<br>9 |
| SNRPD2        | 6.66270<br>6 | 7.63579<br>4 | 6.93676      | 7.66728<br>7 | 7.50259      | 7.52264<br>4 |
| LAMTOR1       | 2.65314<br>6 | 4.55003<br>7 | 3.91482<br>8 | 4.55322<br>7 | 4.64400<br>2 | 4.59328<br>1 |

|        |              |              |              |              |              |              |
|--------|--------------|--------------|--------------|--------------|--------------|--------------|
| CCDC34 | 2.13058<br>7 | 3.89972<br>2 | 2.99230<br>6 | 4.16464<br>6 | 4.14107<br>4 | 4.14919<br>4 |
| SHB    | -<br>6.64386 | 0.17974<br>5 | -<br>2.76587 | 0.89364<br>2 | 1.67964<br>4 | 0.22999<br>7 |
| DUS1L  | 4.31783<br>6 | 5.59351<br>5 | 4.81250<br>5 | 5.50676      | 6.79555<br>7 | 5.45159<br>3 |
| CHAF1A | 4.33745<br>5 | 5.42062<br>9 | 4.77689<br>4 | 5.45300<br>1 | 6.05567      | 5.17804<br>4 |
| MCM5   | 5.45853<br>3 | 6.58615<br>9 | 6.59618<br>4 | 6.87011<br>3 | 7.38167<br>8 | 6.77428<br>1 |
| COMMD4 | 3.55478<br>1 | 4.93749<br>6 | 4.66446<br>1 | 4.99900<br>7 | 5.68712<br>7 | 4.84750<br>1 |
| EXT1   | 4.44987<br>7 | 6.12135<br>5 | 5.54644<br>8 | 5.6675       | 6.32917      | 5.90788<br>2 |
| RGS3   | 4.25732<br>6 | 6.06025<br>3 | 5.34718<br>5 | 5.83096<br>8 | 6.35876<br>2 | 5.47063<br>4 |

Data is presented as numbers of  $\log_2(\text{CPM}+0.01)$ . CPM; counts per million reads mapped.
