# Supplementary material for: 4-1BB co-stimulation further enhances anti-PD-1-mediated reinvigoration of exhausted CD39+ CD8 T cells from primary and metastatic sites of epithelial ovarian cancers
Source: PubMed Central journal article supplement — J Immunother Cancer. 2020 Dec 16;8(2):e001650. doi: 10.1136/jitc-2020-001650 (PMC7745695; doi:10.1136/jitc-2020-001650), 2020-12-16
Supplement: jitc-2020-001650supp008.pdf [file jitc-2020-001650supp008.pdf]

**Supplementary Table S7. GO term analysis with differentially expressed genes between 4-1BB<sup>pos</sup> and 4-1BB<sup>neg</sup> PD-1<sup>high</sup> CD39<sup>+</sup> CD8 TILs**

| <b>Enriched gene sets in 4-1BB<sup>pos</sup> cells</b> |                                                           |                |                    |                                |
|--------------------------------------------------------|-----------------------------------------------------------|----------------|--------------------|--------------------------------|
| <b>GO term</b>                                         | <b>Description</b>                                        | <b>P-value</b> | <b>FDR q-value</b> | <b>Enrichment (N, B, n, b)</b> |
| <a href="#">GO:0022402</a>                             | cell cycle process                                        | 2.98E-58       | 4.61E-54           | 5.43<br>(17665,924,440,125)    |
| <a href="#">GO:0051301</a>                             | cell division                                             | 1.95E-34       | 1.01E-30           | 6.67 (17665,385,440,64)        |
| <a href="#">GO:0006260</a>                             | DNA replication                                           | 1.90E-26       | 3.27E-23           | 9.84 (17665,151,440,37)        |
| <a href="#">GO:0046483</a>                             | heterocycle metabolic process                             | 1.13E-20       | 8.74E-18           | 2.13<br>(17665,2746,440,146)   |
| <a href="#">GO:0051716</a>                             | cellular response to stimulus                             | 3.39E-13       | 9.56E-11           | 1.86<br>(17665,2790,440,129)   |
| <a href="#">GO:1903047</a>                             | mitotic cell cycle process                                | 3.77E-58       | 2.92E-54           | 6.90<br>(17665,605,440,104)    |
| <a href="#">GO:0006259</a>                             | DNA metabolic process                                     | 2.84E-34       | 1.10E-30           | 4.69 (17665,736,440,86)        |
| <a href="#">GO:0051276</a>                             | chromosome organization                                   | 4.57E-34       | 1.42E-30           | 6.86 (17665,363,440,62)        |
| <a href="#">GO:0006974</a>                             | cellular response to DNA damage stimulus                  | 4.94E-27       | 1.28E-23           | 4.25 (17665,708,440,75)        |
| <a href="#">GO:0006996</a>                             | organelle organization                                    | 1.50E-26       | 3.32E-23           | 2.50<br>(17665,2263,440,141)   |
| <a href="#">GO:0006281</a>                             | DNA repair                                                | 1.66E-26       | 3.22E-23           | 5.26 (17665,458,440,60)        |
| <a href="#">GO:0051726</a>                             | regulation of cell cycle                                  | 2.99E-26       | 4.62E-23           | 3.35<br>(17665,1140,440,95)    |
| <a href="#">GO:0010564</a>                             | regulation of cell cycle process                          | 1.52E-25       | 2.14E-22           | 4.08 (17665,728,440,74)        |
| <a href="#">GO:0007051</a>                             | spindle organization                                      | 6.25E-25       | 8.07E-22           | 10.19<br>(17665,134,440,34)    |
| <a href="#">GO:0007059</a>                             | chromosome segregation                                    | 2.41E-24       | 2.87E-21           | 11.31<br>(17665,110,440,31)    |
| <a href="#">GO:0007346</a>                             | regulation of mitotic cell cycle                          | 1.08E-22       | 1.20E-19           | 4.18 (17665,614,440,64)        |
| <a href="#">GO:1901990</a>                             | regulation of mitotic cell cycle phase transition         | 1.25E-22       | 1.29E-19           | 5.15 (17665,405,440,52)        |
| <a href="#">GO:1901987</a>                             | regulation of cell cycle phase transition                 | 5.57E-22       | 5.39E-19           | 4.89 (17665,435,440,53)        |
| <a href="#">GO:0051983</a>                             | regulation of chromosome segregation                      | 6.13E-21       | 5.58E-18           | 10.95 (17665,99,440,27)        |
| <a href="#">GO:0034641</a>                             | cellular nitrogen compound metabolic process              | 8.51E-21       | 7.32E-18           | 2.05<br>(17665,3068,440,157)   |
| <a href="#">GO:0071840</a>                             | cellular component organization or biogenesis             | 1.09E-20       | 8.92E-18           | 1.74<br>(17665,4974,440,215)   |
| <a href="#">GO:0006725</a>                             | cellular aromatic compound metabolic process              | 1.99E-20       | 1.47E-17           | 2.11<br>(17665,2792,440,147)   |
| <a href="#">GO:0006139</a>                             | nucleobase-containing compound metabolic process          | 3.98E-20       | 2.80E-17           | 2.17<br>(17665,2576,440,139)   |
| <a href="#">GO:0007052</a>                             | mitotic spindle organization                              | 4.00E-20       | 2.69E-17           | 12.35 (17665,78,440,24)        |
| <a href="#">GO:0016043</a>                             | cellular component organization                           | 5.24E-20       | 3.38E-17           | 1.73<br>(17665,4929,440,212)   |
| <a href="#">GO:0090304</a>                             | nucleic acid metabolic process                            | 2.85E-19       | 1.76E-16           | 2.32<br>(17665,2060,440,119)   |
| <a href="#">GO:0000278</a>                             | mitotic cell cycle                                        | 3.65E-19       | 2.17E-16           | 8.56 (17665,136,440,29)        |
| <a href="#">GO:1902850</a>                             | microtubule cytoskeleton organization involved in mitosis | 7.95E-19       | 4.56E-16           | 9.76 (17665,107,440,26)        |
| <a href="#">GO:1901360</a>                             | organic cyclic compound metabolic process                 | 3.85E-18       | 2.13E-15           | 1.98<br>(17665,3014,440,149)   |
| <a href="#">GO:0007017</a>                             | microtubule-based process                                 | 9.98E-18       | 5.33E-15           | 3.70 (17665,619,440,57)        |
| <a href="#">GO:0044772</a>                             | mitotic cell cycle phase transition                       | 1.59E-17       | 8.23E-15           | 5.76 (17665,251,440,36)        |
| <a href="#">GO:0044770</a>                             | cell cycle phase transition                               | 4.48E-17       | 2.24E-14           | 5.58 (17665,259,440,36)        |
| <a href="#">GO:0090068</a>                             | positive regulation of cell cycle process                 | 1.11E-16       | 5.37E-14           | 5.27 (17665,282,440,37)        |
| <a href="#">GO:0000226</a>                             | microtubule cytoskeleton organization                     | 1.28E-16       | 5.99E-14           | 4.50 (17665,384,440,43)        |
| <a href="#">GO:0033554</a>                             | cellular response to stress                               | 1.92E-16       | 8.73E-14           | 2.44<br>(17665,1546,440,94)    |
| <a href="#">GO:0033045</a>                             | regulation of sister chromatid segregation                | 2.58E-16       | 1.14E-13           | 10.67 (17665,79,440,21)        |
| <a href="#">GO:0007049</a>                             | cell cycle                                                | 2.90E-16       | 1.25E-13           | 4.21 (17665,429,440,45)        |

|                            |                                                                               |          |          |                               |
|----------------------------|-------------------------------------------------------------------------------|----------|----------|-------------------------------|
| <a href="#">GO:0006271</a> | DNA strand elongation involved in DNA replication                             | 7.97E-16 | 3.34E-13 | 26.77 (17665,18,440,12)       |
| <a href="#">GO:1902749</a> | regulation of cell cycle G2/M phase transition                                | 8.69E-16 | 3.54E-13 | 6.01 (17665,207,440,31)       |
| <a href="#">GO:0071103</a> | DNA conformation change                                                       | 9.88E-16 | 3.92E-13 | 7.08 (17665,153,440,27)       |
| <a href="#">GO:0098813</a> | nuclear chromosome segregation                                                | 1.86E-15 | 7.21E-13 | 13.65 (17665,50,440,17)       |
| <a href="#">GO:0010965</a> | regulation of mitotic sister chromatid separation                             | 2.44E-15 | 9.23E-13 | 12.25 (17665,59,440,18)       |
| <a href="#">GO:0034645</a> | cellular macromolecule biosynthetic process                                   | 5.47E-15 | 2.02E-12 | 2.92 (17665,894,440,65)       |
| <a href="#">GO:0045787</a> | positive regulation of cell cycle                                             | 5.68E-15 | 2.05E-12 | 4.33 (17665,371,440,40)       |
| <a href="#">GO:1905818</a> | regulation of chromosome separation                                           | 1.21E-14 | 4.27E-12 | 11.29 (17665,64,440,18)       |
| <a href="#">GO:0009987</a> | cellular process                                                              | 1.93E-14 | 6.65E-12 | 1.19<br>(17665,13415,440,396) |
| <a href="#">GO:0007088</a> | regulation of mitotic nuclear division                                        | 1.94E-14 | 6.52E-12 | 6.61 (17665,158,440,26)       |
| <a href="#">GO:0006302</a> | double-strand break repair                                                    | 2.32E-14 | 7.65E-12 | 6.27 (17665,173,440,27)       |
| <a href="#">GO:0033047</a> | regulation of mitotic sister chromatid segregation                            | 2.94E-14 | 9.49E-12 | 10.79 (17665,67,440,18)       |
| <a href="#">GO:0010389</a> | regulation of G2/M transition of mitotic cell cycle                           | 5.07E-14 | 1.60E-11 | 5.82 (17665,193,440,28)       |
| <a href="#">GO:0022616</a> | DNA strand elongation                                                         | 5.19E-14 | 1.61E-11 | 20.95 (17665,23,440,12)       |
| <a href="#">GO:0010948</a> | negative regulation of cell cycle process                                     | 7.75E-14 | 2.35E-11 | 4.53 (17665,310,440,35)       |
| <a href="#">GO:0045786</a> | negative regulation of cell cycle                                             | 9.34E-14 | 2.78E-11 | 3.48 (17665,543,440,47)       |
| <a href="#">GO:0030071</a> | regulation of mitotic metaphase/anaphase transition                           | 2.05E-13 | 5.98E-11 | 11.68 (17665,55,440,16)       |
| <a href="#">GO:0009059</a> | macromolecule biosynthetic process                                            | 2.08E-13 | 5.96E-11 | 2.53<br>(17665,1141,440,72)   |
| <a href="#">GO:1902099</a> | regulation of metaphase/anaphase transition of cell cycle                     | 3.80E-13 | 1.05E-10 | 11.27 (17665,57,440,16)       |
| <a href="#">GO:0051783</a> | regulation of nuclear division                                                | 5.97E-13 | 1.62E-10 | 5.74 (17665,182,440,26)       |
| <a href="#">GO:0045930</a> | negative regulation of mitotic cell cycle                                     | 6.44E-13 | 1.72E-10 | 4.46 (17665,297,440,33)       |
| <a href="#">GO:0071897</a> | DNA biosynthetic process                                                      | 1.22E-12 | 3.19E-10 | 8.20 (17665,93,440,19)        |
| <a href="#">GO:1901988</a> | negative regulation of cell cycle phase transition                            | 1.95E-12 | 5.02E-10 | 5.04 (17665,223,440,28)       |
| <a href="#">GO:0006807</a> | nitrogen compound metabolic process                                           | 2.41E-12 | 6.13E-10 | 1.44<br>(17665,6470,440,232)  |
| <a href="#">GO:1901991</a> | negative regulation of mitotic cell cycle phase transition                    | 2.77E-12 | 6.91E-10 | 5.16 (17665,210,440,27)       |
| <a href="#">GO:0033044</a> | regulation of chromosome organization                                         | 3.47E-12 | 8.53E-10 | 4.09 (17665,334,440,34)       |
| <a href="#">GO:0044843</a> | cell cycle G1/S phase transition                                              | 6.90E-12 | 1.67E-09 | 7.48 (17665,102,440,19)       |
| <a href="#">GO:0006270</a> | DNA replication initiation                                                    | 7.07E-12 | 1.68E-09 | 15.06 (17665,32,440,12)       |
| <a href="#">GO:0000075</a> | cell cycle checkpoint                                                         | 1.28E-11 | 3.00E-09 | 6.39 (17665,132,440,21)       |
| <a href="#">GO:0007010</a> | cytoskeleton organization                                                     | 1.36E-11 | 3.14E-09 | 2.66 (17665,860,440,57)       |
| <a href="#">GO:0006310</a> | DNA recombination                                                             | 1.53E-11 | 3.49E-09 | 5.20 (17665,193,440,25)       |
| <a href="#">GO:0044260</a> | cellular macromolecule metabolic process                                      | 1.80E-11 | 4.05E-09 | 1.57<br>(17665,4426,440,173)  |
| <a href="#">GO:0000724</a> | double-strand break repair via homologous recombination                       | 3.80E-11 | 8.40E-09 | 7.30 (17665,99,440,18)        |
| <a href="#">GO:0000725</a> | recombinational repair                                                        | 4.53E-11 | 9.87E-09 | 7.23 (17665,100,440,18)       |
| <a href="#">GO:0000082</a> | G1/S transition of mitotic cell cycle                                         | 4.53E-11 | 9.74E-09 | 7.23 (17665,100,440,18)       |
| <a href="#">GO:0000727</a> | double-strand break repair via break-induced replication                      | 6.31E-11 | 1.34E-08 | 26.77 (17665,12,440,8)        |
| <a href="#">GO:0000819</a> | sister chromatid segregation                                                  | 7.40E-11 | 1.55E-08 | 12.68 (17665,38,440,12)       |
| <a href="#">GO:0044237</a> | cellular metabolic process                                                    | 9.01E-11 | 1.86E-08 | 1.38<br>(17665,7066,440,242)  |
| <a href="#">GO:0032392</a> | DNA geometric change                                                          | 2.34E-10 | 4.77E-08 | 6.57 (17665,110,440,18)       |
| <a href="#">GO:0043170</a> | macromolecule metabolic process                                               | 2.37E-10 | 4.77E-08 | 1.44<br>(17665,5683,440,204)  |
| <a href="#">GO:0051383</a> | kinetochore organization                                                      | 2.52E-10 | 5.00E-08 | 19.02 (17665,19,440,9)        |
| <a href="#">GO:0051225</a> | spindle assembly                                                              | 3.31E-10 | 6.48E-08 | 8.14 (17665,74,440,15)        |
| <a href="#">GO:0000083</a> | regulation of transcription involved in G1/S transition of mitotic cell cycle | 3.45E-10 | 6.68E-08 | 12.99 (17665,34,440,11)       |
| <a href="#">GO:0044249</a> | cellular biosynthetic process                                                 | 4.49E-10 | 8.59E-08 | 1.86<br>(17665,2137,440,99)   |

|                            |                                                                |          |          |                              |
|----------------------------|----------------------------------------------------------------|----------|----------|------------------------------|
| <a href="#">GO:0000070</a> | mitotic sister chromatid segregation                           | 4.92E-10 | 9.29E-08 | 12.62 (17665,35,440,11)      |
| <a href="#">GO:0065004</a> | protein-DNA complex assembly                                   | 6.24E-10 | 1.16E-07 | 5.50 (17665,146,440,20)      |
| <a href="#">GO:0044238</a> | primary metabolic process                                      | 6.44E-10 | 1.19E-07 | 1.36<br>(17665,6918,440,235) |
| <a href="#">GO:0032508</a> | DNA duplex unwinding                                           | 6.47E-10 | 1.18E-07 | 6.63 (17665,103,440,17)      |
| <a href="#">GO:0022607</a> | cellular component assembly                                    | 1.13E-09 | 2.04E-07 | 1.84<br>(17665,2112,440,97)  |
| <a href="#">GO:0045931</a> | positive regulation of mitotic cell cycle                      | 1.29E-09 | 2.29E-07 | 5.28 (17665,152,440,20)      |
| <a href="#">GO:0071704</a> | organic substance metabolic process                            | 1.32E-09 | 2.32E-07 | 1.34<br>(17665,7276,440,243) |
| <a href="#">GO:0033043</a> | regulation of organelle organization                           | 1.57E-09 | 2.72E-07 | 2.16<br>(17665,1244,440,67)  |
| <a href="#">GO:1901576</a> | organic substance biosynthetic process                         | 1.81E-09 | 3.12E-07 | 1.80<br>(17665,2255,440,101) |
| <a href="#">GO:1901989</a> | positive regulation of cell cycle phase transition             | 2.09E-09 | 3.56E-07 | 6.62 (17665,97,440,16)       |
| <a href="#">GO:0009058</a> | biosynthetic process                                           | 2.97E-09 | 4.99E-07 | 1.78<br>(17665,2307,440,102) |
| <a href="#">GO:0000281</a> | mitotic cytokinesis                                            | 3.24E-09 | 5.39E-07 | 9.45 (17665,51,440,12)       |
| <a href="#">GO:0007093</a> | mitotic cell cycle checkpoint                                  | 3.31E-09 | 5.46E-07 | 6.42 (17665,100,440,16)      |
| <a href="#">GO:0006333</a> | chromatin assembly or disassembly                              | 4.02E-09 | 6.55E-07 | 8.28 (17665,63,440,13)       |
| <a href="#">GO:0051052</a> | regulation of DNA metabolic process                            | 4.63E-09 | 7.46E-07 | 3.19 (17665,415,440,33)      |
| <a href="#">GO:0000723</a> | telomere maintenance                                           | 4.92E-09 | 7.85E-07 | 6.77 (17665,89,440,15)       |
| <a href="#">GO:0032200</a> | telomere organization                                          | 5.77E-09 | 9.12E-07 | 6.69 (17665,90,440,15)       |
| <a href="#">GO:0072331</a> | signal transduction by p53 class mediator                      | 6.37E-09 | 9.97E-07 | 5.74 (17665,119,440,17)      |
| <a href="#">GO:0071824</a> | protein-DNA complex subunit organization                       | 6.80E-09 | 1.05E-06 | 4.58 (17665,184,440,21)      |
| <a href="#">GO:1901992</a> | positive regulation of mitotic cell cycle phase transition     | 1.15E-08 | 1.76E-06 | 6.94 (17665,81,440,14)       |
| <a href="#">GO:0006950</a> | response to stress                                             | 1.26E-08 | 1.91E-06 | 1.63<br>(17665,2955,440,120) |
| <a href="#">GO:0070925</a> | organelle assembly                                             | 1.61E-08 | 2.42E-06 | 2.86 (17665,505,440,36)      |
| <a href="#">GO:0051303</a> | establishment of chromosome localization                       | 2.33E-08 | 3.47E-06 | 8.03 (17665,60,440,12)       |
| <a href="#">GO:0042770</a> | signal transduction in response to DNA damage                  | 2.54E-08 | 3.75E-06 | 6.02 (17665,100,440,15)      |
| <a href="#">GO:0051984</a> | positive regulation of chromosome segregation                  | 3.06E-08 | 4.47E-06 | 12.04 (17665,30,440,9)       |
| <a href="#">GO:0030261</a> | chromosome condensation                                        | 3.06E-08 | 4.43E-06 | 12.04 (17665,30,440,9)       |
| <a href="#">GO:0050000</a> | chromosome localization                                        | 3.44E-08 | 4.93E-06 | 7.77 (17665,62,440,12)       |
| <a href="#">GO:0033046</a> | negative regulation of sister chromatid segregation            | 4.22E-08 | 5.99E-06 | 11.66 (17665,31,440,9)       |
| <a href="#">GO:0000910</a> | cytokinesis                                                    | 4.99E-08 | 7.03E-06 | 7.53 (17665,64,440,12)       |
| <a href="#">GO:0061640</a> | cytoskeleton-dependent cytokinesis                             | 4.99E-08 | 6.97E-06 | 7.53 (17665,64,440,12)       |
| <a href="#">GO:0051985</a> | negative regulation of chromosome segregation                  | 5.74E-08 | 7.93E-06 | 11.29 (17665,32,440,9)       |
| <a href="#">GO:0030330</a> | DNA damage response, signal transduction by p53 class mediator | 6.03E-08 | 8.26E-06 | 6.69 (17665,78,440,13)       |
| <a href="#">GO:0000076</a> | DNA replication checkpoint                                     | 8.89E-08 | 1.21E-05 | 16.53 (17665,17,440,7)       |
| <a href="#">GO:0032201</a> | telomere maintenance via semi-conservative replication         | 1.04E-07 | 1.40E-05 | 12.85 (17665,25,440,8)       |
| <a href="#">GO:0031145</a> | anaphase-promoting complex-dependent catabolic process         | 1.11E-07 | 1.49E-05 | 6.36 (17665,82,440,13)       |
| <a href="#">GO:2000816</a> | negative regulation of mitotic sister chromatid separation     | 1.46E-07 | 1.94E-05 | 12.35 (17665,26,440,8)       |
| <a href="#">GO:0000086</a> | G2/M transition of mitotic cell cycle                          | 1.68E-07 | 2.21E-05 | 4.90 (17665,131,440,16)      |
| <a href="#">GO:0008152</a> | metabolic process                                              | 1.69E-07 | 2.19E-05 | 1.27<br>(17665,7781,440,247) |
| <a href="#">GO:0006323</a> | DNA packaging                                                  | 1.76E-07 | 2.27E-05 | 10.04 (17665,36,440,9)       |
| <a href="#">GO:0051310</a> | metaphase plate congression                                    | 1.88E-07 | 2.41E-05 | 8.54 (17665,47,440,10)       |
| <a href="#">GO:0051302</a> | regulation of cell division                                    | 1.97E-07 | 2.50E-05 | 4.33 (17665,167,440,18)      |
| <a href="#">GO:1905819</a> | negative regulation of chromosome separation                   | 2.04E-07 | 2.56E-05 | 11.90 (17665,27,440,8)       |
| <a href="#">GO:0044839</a> | cell cycle G2/M phase transition                               | 2.08E-07 | 2.60E-05 | 4.83 (17665,133,440,16)      |

|                            |                                                                                 |          |          |                          |
|----------------------------|---------------------------------------------------------------------------------|----------|----------|--------------------------|
| <a href="#">GO:0006334</a> | nucleosome assembly                                                             | 2.66E-07 | 3.30E-05 | 6.51 (17665,74,440,12)   |
| <a href="#">GO:0032465</a> | regulation of cytokinesis                                                       | 3.00E-07 | 3.68E-05 | 5.86 (17665,89,440,13)   |
| <a href="#">GO:0051988</a> | regulation of attachment of spindle microtubules to kinetochore                 | 3.42E-07 | 4.16E-05 | 18.53 (17665,13,440,6)   |
| <a href="#">GO:0033048</a> | negative regulation of mitotic sister chromatid segregation                     | 3.77E-07 | 4.56E-05 | 11.08 (17665,29,440,8)   |
| <a href="#">GO:1902299</a> | pre-replicative complex assembly involved in cell cycle DNA replication         | 4.93E-07 | 5.92E-05 | 25.09 (17665,8,440,5)    |
| <a href="#">GO:0036388</a> | pre-replicative complex assembly                                                | 4.93E-07 | 5.88E-05 | 25.09 (17665,8,440,5)    |
| <a href="#">GO:0006267</a> | pre-replicative complex assembly involved in nuclear cell cycle DNA replication | 4.93E-07 | 5.83E-05 | 25.09 (17665,8,440,5)    |
| <a href="#">GO:0051382</a> | kinetochore assembly                                                            | 5.85E-07 | 6.86E-05 | 17.21 (17665,14,440,6)   |
| <a href="#">GO:0051640</a> | organelle localization                                                          | 6.60E-07 | 7.68E-05 | 2.59 (17665,512,440,33)  |
| <a href="#">GO:0031055</a> | chromatin remodeling at centromere                                              | 6.63E-07 | 7.66E-05 | 10.36 (17665,31,440,8)   |
| <a href="#">GO:0071173</a> | spindle assembly checkpoint                                                     | 7.00E-07 | 8.02E-05 | 12.77 (17665,22,440,7)   |
| <a href="#">GO:0071174</a> | mitotic spindle checkpoint                                                      | 7.00E-07 | 7.97E-05 | 12.77 (17665,22,440,7)   |
| <a href="#">GO:0007094</a> | mitotic spindle assembly checkpoint                                             | 7.00E-07 | 7.91E-05 | 12.77 (17665,22,440,7)   |
| <a href="#">GO:0031577</a> | spindle checkpoint                                                              | 7.00E-07 | 7.85E-05 | 12.77 (17665,22,440,7)   |
| <a href="#">GO:0072422</a> | signal transduction involved in DNA damage checkpoint                           | 8.63E-07 | 9.61E-05 | 6.49 (17665,68,440,11)   |
| <a href="#">GO:0072401</a> | signal transduction involved in DNA integrity checkpoint                        | 8.63E-07 | 9.55E-05 | 6.49 (17665,68,440,11)   |
| <a href="#">GO:1902750</a> | negative regulation of cell cycle G2/M phase transition                         | 9.35E-07 | 1.03E-04 | 5.33 (17665,98,440,13)   |
| <a href="#">GO:0072395</a> | signal transduction involved in cell cycle checkpoint                           | 1.00E-06 | 1.09E-04 | 6.40 (17665,69,440,11)   |
| <a href="#">GO:0045841</a> | negative regulation of mitotic metaphase/anaphase transition                    | 1.36E-06 | 1.47E-04 | 11.71 (17665,24,440,7)   |
| <a href="#">GO:0051054</a> | positive regulation of DNA metabolic process                                    | 1.45E-06 | 1.55E-04 | 3.48 (17665,231,440,20)  |
| <a href="#">GO:0045132</a> | meiotic chromosome segregation                                                  | 1.50E-06 | 1.60E-04 | 15.06 (17665,16,440,6)   |
| <a href="#">GO:2001251</a> | negative regulation of chromosome organization                                  | 1.57E-06 | 1.67E-04 | 4.72 (17665,119,440,14)  |
| <a href="#">GO:0090307</a> | mitotic spindle assembly                                                        | 1.81E-06 | 1.91E-04 | 9.18 (17665,35,440,8)    |
| <a href="#">GO:1902100</a> | negative regulation of metaphase/anaphase transition of cell cycle              | 1.85E-06 | 1.93E-04 | 11.24 (17665,25,440,7)   |
| <a href="#">GO:0010972</a> | negative regulation of G2/M transition of mitotic cell cycle                    | 2.06E-06 | 2.14E-04 | 5.41 (17665,89,440,12)   |
| <a href="#">GO:0019438</a> | aromatic compound biosynthetic process                                          | 2.61E-06 | 2.69E-04 | 1.99 (17665,1008,440,50) |
| <a href="#">GO:0006336</a> | DNA replication-independent nucleosome assembly                                 | 2.85E-06 | 2.92E-04 | 8.68 (17665,37,440,8)    |
| <a href="#">GO:0006735</a> | NADH regeneration                                                               | 3.27E-06 | 3.33E-04 | 10.41 (17665,27,440,7)   |
| <a href="#">GO:0061718</a> | glucose catabolic process to pyruvate                                           | 3.27E-06 | 3.31E-04 | 10.41 (17665,27,440,7)   |
| <a href="#">GO:0061621</a> | canonical glycolysis                                                            | 3.27E-06 | 3.29E-04 | 10.41 (17665,27,440,7)   |
| <a href="#">GO:0070507</a> | regulation of microtubule cytoskeleton organization                             | 3.44E-06 | 3.43E-04 | 3.73 (17665,183,440,17)  |
| <a href="#">GO:0071158</a> | positive regulation of cell cycle arrest                                        | 3.50E-06 | 3.48E-04 | 5.66 (17665,78,440,11)   |
| <a href="#">GO:0034724</a> | DNA replication-independent nucleosome organization                             | 3.53E-06 | 3.48E-04 | 8.45 (17665,38,440,8)    |
| <a href="#">GO:0007062</a> | sister chromatid cohesion                                                       | 3.53E-06 | 3.46E-04 | 8.45 (17665,38,440,8)    |
| <a href="#">GO:0043933</a> | protein-containing complex subunit organization                                 | 3.76E-06 | 3.66E-04 | 1.77 (17665,1500,440,66) |
| <a href="#">GO:0034728</a> | nucleosome organization                                                         | 3.90E-06 | 3.77E-04 | 4.70 (17665,111,440,13)  |
| <a href="#">GO:0006275</a> | regulation of DNA replication                                                   | 3.90E-06 | 3.75E-04 | 4.70 (17665,111,440,13)  |
| <a href="#">GO:0044271</a> | cellular nitrogen compound biosynthetic process                                 | 3.97E-06 | 3.79E-04 | 1.84 (17665,1289,440,59) |
| <a href="#">GO:0061620</a> | glycolytic process through glucose-6-phosphate                                  | 4.27E-06 | 4.05E-04 | 10.04 (17665,28,440,7)   |
| <a href="#">GO:0061615</a> | glycolytic process through fructose-6-phosphate                                 | 4.27E-06 | 4.03E-04 | 10.04 (17665,28,440,7)   |
| <a href="#">GO:0045839</a> | negative regulation of mitotic nuclear division                                 | 4.34E-06 | 4.07E-04 | 8.24 (17665,39,440,8)    |
| <a href="#">GO:0018130</a> | heterocycle biosynthetic process                                                | 4.51E-06 | 4.21E-04 | 1.97 (17665,999,440,49)  |
| <a href="#">GO:0009124</a> | nucleoside monophosphate biosynthetic process                                   | 4.63E-06 | 4.29E-04 | 5.02 (17665,96,440,12)   |
| <a href="#">GO:0031023</a> | microtubule organizing center organization                                      | 5.03E-06 | 4.64E-04 | 6.08 (17665,66,440,10)   |

|                            |                                                                                               |          |          |                          |
|----------------------------|-----------------------------------------------------------------------------------------------|----------|----------|--------------------------|
| <a href="#">GO:0034080</a> | CENP-A containing nucleosome assembly                                                         | 5.51E-06 | 5.04E-04 | 9.69 (17665,29,440,7)    |
| <a href="#">GO:0006298</a> | mismatch repair                                                                               | 5.51E-06 | 5.01E-04 | 9.69 (17665,29,440,7)    |
| <a href="#">GO:0031570</a> | DNA integrity checkpoint                                                                      | 5.77E-06 | 5.22E-04 | 5.39 (17665,82,440,11)   |
| <a href="#">GO:0051255</a> | spindle midzone assembly                                                                      | 6.42E-06 | 5.78E-04 | 16.73 (17665,12,440,5)   |
| <a href="#">GO:0008608</a> | attachment of spindle microtubules to kinetochore                                             | 6.65E-06 | 5.95E-04 | 12.04 (17665,20,440,6)   |
| <a href="#">GO:0045840</a> | positive regulation of mitotic nuclear division                                               | 6.69E-06 | 5.95E-04 | 6.69 (17665,54,440,9)    |
| <a href="#">GO:0032886</a> | regulation of microtubule-based process                                                       | 6.79E-06 | 6.01E-04 | 3.39 (17665,213,440,18)  |
| <a href="#">GO:1902751</a> | positive regulation of cell cycle G2/M phase transition                                       | 7.03E-06 | 6.18E-04 | 9.37 (17665,30,440,7)    |
| <a href="#">GO:0006977</a> | DNA damage response, signal transduction by p53 class mediator resulting in cell cycle arrest | 7.83E-06 | 6.85E-04 | 6.57 (17665,55,440,9)    |
| <a href="#">GO:1903046</a> | meiotic cell cycle process                                                                    | 7.84E-06 | 6.82E-04 | 3.89 (17665,155,440,15)  |
| <a href="#">GO:0034654</a> | nucleobase-containing compound biosynthetic process                                           | 7.91E-06 | 6.84E-04 | 1.98 (17665,933,440,46)  |
| <a href="#">GO:0006325</a> | chromatin organization                                                                        | 8.06E-06 | 6.93E-04 | 2.24 (17665,628,440,35)  |
| <a href="#">GO:0071156</a> | regulation of cell cycle arrest                                                               | 8.75E-06 | 7.48E-04 | 4.72 (17665,102,440,12)  |
| <a href="#">GO:0006007</a> | glucose catabolic process                                                                     | 8.89E-06 | 7.56E-04 | 9.07 (17665,31,440,7)    |
| <a href="#">GO:1902400</a> | intracellular signal transduction involved in G1 DNA damage checkpoint                        | 9.12E-06 | 7.72E-04 | 6.45 (17665,56,440,9)    |
| <a href="#">GO:1902403</a> | signal transduction involved in mitotic DNA integrity checkpoint                              | 9.12E-06 | 7.68E-04 | 6.45 (17665,56,440,9)    |
| <a href="#">GO:1902402</a> | signal transduction involved in mitotic DNA damage checkpoint                                 | 9.12E-06 | 7.63E-04 | 6.45 (17665,56,440,9)    |
| <a href="#">GO:0072431</a> | signal transduction involved in mitotic G1 DNA damage checkpoint                              | 9.12E-06 | 7.59E-04 | 6.45 (17665,56,440,9)    |
| <a href="#">GO:0072413</a> | signal transduction involved in mitotic cell cycle checkpoint                                 | 9.12E-06 | 7.55E-04 | 6.45 (17665,56,440,9)    |
| <a href="#">GO:0046605</a> | regulation of centrosome cycle                                                                | 1.06E-05 | 8.73E-04 | 6.34 (17665,57,440,9)    |
| <a href="#">GO:0043486</a> | histone exchange                                                                              | 1.12E-05 | 9.19E-04 | 7.30 (17665,44,440,8)    |
| <a href="#">GO:0010032</a> | meiotic chromosome condensation                                                               | 1.25E-05 | 1.02E-03 | 22.94 (17665,7,440,4)    |
| <a href="#">GO:0071163</a> | DNA replication preinitiation complex assembly                                                | 1.54E-05 | 1.24E-03 | 40.15 (17665,3,440,3)    |
| <a href="#">GO:0006297</a> | nucleotide-excision repair, DNA gap filling                                                   | 1.63E-05 | 1.31E-03 | 10.47 (17665,23,440,6)   |
| <a href="#">GO:0034622</a> | cellular protein-containing complex assembly                                                  | 1.70E-05 | 1.36E-03 | 2.06 (17665,761,440,39)  |
| <a href="#">GO:0010638</a> | positive regulation of organelle organization                                                 | 1.86E-05 | 1.48E-03 | 2.21 (17665,599,440,33)  |
| <a href="#">GO:0051784</a> | negative regulation of nuclear division                                                       | 1.86E-05 | 1.48E-03 | 6.83 (17665,47,440,8)    |
| <a href="#">GO:0009123</a> | nucleoside monophosphate metabolic process                                                    | 2.07E-05 | 1.63E-03 | 3.58 (17665,168,440,15)  |
| <a href="#">GO:0007076</a> | mitotic chromosome condensation                                                               | 2.29E-05 | 1.80E-03 | 13.38 (17665,15,440,5)   |
| <a href="#">GO:0065003</a> | protein-containing complex assembly                                                           | 2.42E-05 | 1.89E-03 | 1.78 (17665,1215,440,54) |
| <a href="#">GO:0051256</a> | mitotic spindle midzone assembly                                                              | 2.46E-05 | 1.91E-03 | 20.07 (17665,8,440,4)    |
| <a href="#">GO:0006734</a> | NADH metabolic process                                                                        | 2.53E-05 | 1.96E-03 | 7.81 (17665,36,440,7)    |
| <a href="#">GO:0009142</a> | nucleoside triphosphate biosynthetic process                                                  | 2.58E-05 | 1.98E-03 | 5.08 (17665,79,440,10)   |
| <a href="#">GO:0000731</a> | DNA synthesis involved in DNA repair                                                          | 2.98E-05 | 2.29E-03 | 6.42 (17665,50,440,8)    |
| <a href="#">GO:0006301</a> | postreplication repair                                                                        | 2.98E-05 | 2.27E-03 | 6.42 (17665,50,440,8)    |
| <a href="#">GO:0007080</a> | mitotic metaphase plate congression                                                           | 3.06E-05 | 2.32E-03 | 7.60 (17665,37,440,7)    |
| <a href="#">GO:2001252</a> | positive regulation of chromosome organization                                                | 3.57E-05 | 2.70E-03 | 3.42 (17665,176,440,15)  |
| <a href="#">GO:1901362</a> | organic cyclic compound biosynthetic process                                                  | 3.58E-05 | 2.69E-03 | 1.79 (17665,1141,440,51) |
| <a href="#">GO:0009141</a> | nucleoside triphosphate metabolic process                                                     | 3.66E-05 | 2.74E-03 | 3.60 (17665,156,440,14)  |
| <a href="#">GO:0009435</a> | NAD biosynthetic process                                                                      | 4.00E-05 | 2.98E-03 | 6.18 (17665,52,440,8)    |
| <a href="#">GO:1901293</a> | nucleoside phosphate biosynthetic process                                                     | 4.49E-05 | 3.33E-03 | 2.95 (17665,245,440,18)  |
| <a href="#">GO:0007019</a> | microtubule depolymerization                                                                  | 4.53E-05 | 3.34E-03 | 11.81 (17665,17,440,5)   |
| <a href="#">GO:0051785</a> | positive regulation of nuclear division                                                       | 4.56E-05 | 3.34E-03 | 5.31 (17665,68,440,9)    |
| <a href="#">GO:0032467</a> | positive regulation of cytokinesis                                                            | 5.19E-05 | 3.79E-03 | 7.03 (17665,40,440,7)    |

|                            |                                                              |          |          |                               |
|----------------------------|--------------------------------------------------------------|----------|----------|-------------------------------|
| <a href="#">GO:0006096</a> | glycolytic process                                           | 5.19E-05 | 3.77E-03 | 7.03 (17665,40,440,7)         |
| <a href="#">GO:0006272</a> | leading strand elongation                                    | 6.03E-05 | 4.36E-03 | 30.11 (17665,4,440,3)         |
| <a href="#">GO:0007079</a> | mitotic chromosome movement towards spindle pole             | 6.03E-05 | 4.34E-03 | 30.11 (17665,4,440,3)         |
| <a href="#">GO:0006757</a> | ATP generation from ADP                                      | 6.13E-05 | 4.39E-03 | 6.85 (17665,41,440,7)         |
| <a href="#">GO:0048522</a> | positive regulation of cellular process                      | 6.28E-05 | 4.48E-03 | 1.29<br>(17665,5162,440,166)  |
| <a href="#">GO:0010639</a> | negative regulation of organelle organization                | 6.34E-05 | 4.50E-03 | 2.48 (17665,372,440,23)       |
| <a href="#">GO:0031109</a> | microtubule polymerization or depolymerization               | 6.74E-05 | 4.76E-03 | 8.31 (17665,29,440,6)         |
| <a href="#">GO:0033314</a> | mitotic DNA replication checkpoint                           | 7.08E-05 | 4.98E-03 | 16.06 (17665,10,440,4)        |
| <a href="#">GO:0034404</a> | nucleobase-containing small molecule biosynthetic process    | 7.50E-05 | 5.25E-03 | 3.57 (17665,146,440,13)       |
| <a href="#">GO:0051656</a> | establishment of organelle localization                      | 7.80E-05 | 5.44E-03 | 2.65 (17665,303,440,20)       |
| <a href="#">GO:0006165</a> | nucleoside diphosphate phosphorylation                       | 7.88E-05 | 5.47E-03 | 5.63 (17665,57,440,8)         |
| <a href="#">GO:0062033</a> | positive regulation of mitotic sister chromatid segregation  | 8.16E-05 | 5.64E-03 | 10.57 (17665,19,440,5)        |
| <a href="#">GO:0007063</a> | regulation of sister chromatid cohesion                      | 8.16E-05 | 5.62E-03 | 10.57 (17665,19,440,5)        |
| <a href="#">GO:2000045</a> | regulation of G1/S transition of mitotic cell cycle          | 9.24E-05 | 6.33E-03 | 3.50 (17665,149,440,13)       |
| <a href="#">GO:0042866</a> | pyruvate biosynthetic process                                | 9.79E-05 | 6.68E-03 | 6.39 (17665,44,440,7)         |
| <a href="#">GO:0016572</a> | histone phosphorylation                                      | 1.00E-04 | 6.80E-03 | 7.77 (17665,31,440,6)         |
| <a href="#">GO:0046939</a> | nucleotide phosphorylation                                   | 1.01E-04 | 6.85E-03 | 5.44 (17665,59,440,8)         |
| <a href="#">GO:0009162</a> | deoxyribonucleoside monophosphate metabolic process          | 1.09E-04 | 7.34E-03 | 14.60 (17665,11,440,4)        |
| <a href="#">GO:0006261</a> | DNA-dependent DNA replication                                | 1.21E-04 | 8.09E-03 | 7.53 (17665,32,440,6)         |
| <a href="#">GO:0009165</a> | nucleotide biosynthetic process                              | 1.26E-04 | 8.41E-03 | 2.82 (17665,242,440,17)       |
| <a href="#">GO:1901796</a> | regulation of signal transduction by p53 class mediator      | 1.36E-04 | 9.01E-03 | 3.19 (17665,176,440,14)       |
| <a href="#">GO:0000915</a> | actomyosin contractile ring assembly                         | 1.48E-04 | 9.78E-03 | 24.09 (17665,5,440,3)         |
| <a href="#">GO:0000912</a> | assembly of actomyosin apparatus involved in cytokinesis     | 1.48E-04 | 9.74E-03 | 24.09 (17665,5,440,3)         |
| <a href="#">GO:1902975</a> | mitotic DNA replication initiation                           | 1.48E-04 | 9.70E-03 | 24.09 (17665,5,440,3)         |
| <a href="#">GO:1902315</a> | nuclear cell cycle DNA replication initiation                | 1.48E-04 | 9.66E-03 | 24.09 (17665,5,440,3)         |
| <a href="#">GO:1902292</a> | cell cycle DNA replication initiation                        | 1.48E-04 | 9.62E-03 | 24.09 (17665,5,440,3)         |
| <a href="#">GO:0044837</a> | actomyosin contractile ring organization                     | 1.48E-04 | 9.58E-03 | 24.09 (17665,5,440,3)         |
| <a href="#">GO:0008150</a> | biological_process                                           | 1.57E-04 | 1.01E-02 | 1.05<br>(17665,16319,440,425) |
| <a href="#">GO:0051315</a> | attachment of mitotic spindle microtubules to kinetochore    | 1.60E-04 | 1.03E-02 | 13.38 (17665,12,440,4)        |
| <a href="#">GO:0035404</a> | histone-serine phosphorylation                               | 1.60E-04 | 1.03E-02 | 13.38 (17665,12,440,4)        |
| <a href="#">GO:1904029</a> | regulation of cyclin-dependent protein kinase activity       | 1.65E-04 | 1.05E-02 | 4.10 (17665,98,440,10)        |
| <a href="#">GO:0006278</a> | RNA-dependent DNA biosynthetic process                       | 1.74E-04 | 1.10E-02 | 9.12 (17665,22,440,5)         |
| <a href="#">GO:0046031</a> | ADP metabolic process                                        | 1.97E-04 | 1.25E-02 | 5.74 (17665,49,440,7)         |
| <a href="#">GO:0050896</a> | response to stimulus                                         | 2.08E-04 | 1.31E-02 | 1.26<br>(17665,5275,440,166)  |
| <a href="#">GO:0048146</a> | positive regulation of fibroblast proliferation              | 2.25E-04 | 1.41E-02 | 5.62 (17665,50,440,7)         |
| <a href="#">GO:0019320</a> | hexose catabolic process                                     | 2.25E-04 | 1.40E-02 | 5.62 (17665,50,440,7)         |
| <a href="#">GO:0045842</a> | positive regulation of mitotic metaphase/anaphase transition | 2.27E-04 | 1.41E-02 | 12.35 (17665,13,440,4)        |
| <a href="#">GO:1901970</a> | positive regulation of mitotic sister chromatid separation   | 2.27E-04 | 1.41E-02 | 12.35 (17665,13,440,4)        |
| <a href="#">GO:0051304</a> | chromosome separation                                        | 2.27E-04 | 1.40E-02 | 12.35 (17665,13,440,4)        |
| <a href="#">GO:2000134</a> | negative regulation of G1/S transition of mitotic cell cycle | 2.29E-04 | 1.41E-02 | 3.94 (17665,102,440,10)       |
| <a href="#">GO:0032506</a> | cytokinetic process                                          | 2.38E-04 | 1.46E-02 | 6.69 (17665,36,440,6)         |
| <a href="#">GO:0009201</a> | ribonucleoside triphosphate biosynthetic process             | 2.50E-04 | 1.53E-02 | 4.79 (17665,67,440,8)         |
| <a href="#">GO:0006754</a> | ATP biosynthetic process                                     | 2.55E-04 | 1.55E-02 | 5.51 (17665,51,440,7)         |
| <a href="#">GO:1902806</a> | regulation of cell cycle G1/S phase transition               | 2.56E-04 | 1.55E-02 | 3.16 (17665,165,440,13)       |
| <a href="#">GO:0019674</a> | NAD metabolic process                                        | 2.78E-04 | 1.67E-02 | 4.72 (17665,68,440,8)         |



|                            |                                                                         |          |          |                          |
|----------------------------|-------------------------------------------------------------------------|----------|----------|--------------------------|
| <a href="#">GO:0019363</a> | pyridine nucleotide biosynthetic process                                | 2.78E-04 | 1.67E-02 | 4.72 (17665,68,440,8)    |
| <a href="#">GO:0019359</a> | nicotinamide nucleotide biosynthetic process                            | 2.78E-04 | 1.66E-02 | 4.72 (17665,68,440,8)    |
| <a href="#">GO:0051781</a> | positive regulation of cell division                                    | 2.87E-04 | 1.71E-02 | 4.20 (17665,86,440,9)    |
| <a href="#">GO:0090329</a> | regulation of DNA-dependent DNA replication                             | 2.88E-04 | 1.71E-02 | 5.40 (17665,52,440,7)    |
| <a href="#">GO:0006915</a> | apoptotic process                                                       | 2.89E-04 | 1.71E-02 | 1.96 (17665,634,440,31)  |
| <a href="#">GO:0009211</a> | pyrimidine deoxyribonucleoside triphosphate metabolic process           | 2.90E-04 | 1.71E-02 | 20.07 (17665,6,440,3)    |
| <a href="#">GO:1902807</a> | negative regulation of cell cycle G1/S phase transition                 | 2.90E-04 | 1.70E-02 | 3.82 (17665,105,440,10)  |
| <a href="#">GO:0009166</a> | nucleotide catabolic process                                            | 2.90E-04 | 1.70E-02 | 3.82 (17665,105,440,10)  |
| <a href="#">GO:2000573</a> | positive regulation of DNA biosynthetic process                         | 3.07E-04 | 1.79E-02 | 4.65 (17665,69,440,8)    |
| <a href="#">GO:1902101</a> | positive regulation of metaphase/anaphase transition of cell cycle      | 3.12E-04 | 1.81E-02 | 11.47 (17665,14,440,4)   |
| <a href="#">GO:1903504</a> | regulation of mitotic spindle checkpoint                                | 3.12E-04 | 1.80E-02 | 11.47 (17665,14,440,4)   |
| <a href="#">GO:0090266</a> | regulation of mitotic cell cycle spindle assembly checkpoint            | 3.12E-04 | 1.79E-02 | 11.47 (17665,14,440,4)   |
| <a href="#">GO:0090231</a> | regulation of spindle checkpoint                                        | 3.12E-04 | 1.79E-02 | 11.47 (17665,14,440,4)   |
| <a href="#">GO:0009156</a> | ribonucleoside monophosphate biosynthetic process                       | 3.13E-04 | 1.79E-02 | 4.15 (17665,87,440,9)    |
| <a href="#">GO:0044282</a> | small molecule catabolic process                                        | 3.16E-04 | 1.80E-02 | 2.23 (17665,415,440,23)  |
| <a href="#">GO:0045005</a> | DNA-dependent DNA replication maintenance of fidelity                   | 3.24E-04 | 1.84E-02 | 6.34 (17665,38,440,6)    |
| <a href="#">GO:2000278</a> | regulation of DNA biosynthetic process                                  | 3.39E-04 | 1.91E-02 | 3.75 (17665,107,440,10)  |
| <a href="#">GO:0055086</a> | nucleobase-containing small molecule metabolic process                  | 3.54E-04 | 1.99E-02 | 2.02 (17665,556,440,28)  |
| <a href="#">GO:0051338</a> | regulation of transferase activity                                      | 3.61E-04 | 2.02E-02 | 1.74 (17665,971,440,42)  |
| <a href="#">GO:0051347</a> | positive regulation of transferase activity                             | 3.68E-04 | 2.05E-02 | 1.91 (17665,672,440,32)  |
| <a href="#">GO:0007098</a> | centrosome cycle                                                        | 3.75E-04 | 2.09E-02 | 6.18 (17665,39,440,6)    |
| <a href="#">GO:0006753</a> | nucleoside phosphate metabolic process                                  | 3.82E-04 | 2.12E-02 | 2.11 (17665,475,440,25)  |
| <a href="#">GO:0006760</a> | folic acid-containing compound metabolic process                        | 4.00E-04 | 2.21E-02 | 7.72 (17665,26,440,5)    |
| <a href="#">GO:0072525</a> | pyridine-containing compound biosynthetic process                       | 4.12E-04 | 2.27E-02 | 4.46 (17665,72,440,8)    |
| <a href="#">GO:0006268</a> | DNA unwinding involved in DNA replication                               | 4.17E-04 | 2.29E-02 | 10.71 (17665,15,440,4)   |
| <a href="#">GO:1905820</a> | positive regulation of chromosome separation                            | 4.17E-04 | 2.28E-02 | 10.71 (17665,15,440,4)   |
| <a href="#">GO:0009263</a> | deoxyribonucleotide biosynthetic process                                | 4.17E-04 | 2.27E-02 | 10.71 (17665,15,440,4)   |
| <a href="#">GO:0019985</a> | translesion synthesis                                                   | 4.32E-04 | 2.35E-02 | 6.02 (17665,40,440,6)    |
| <a href="#">GO:0009168</a> | purine ribonucleoside monophosphate biosynthetic process                | 4.53E-04 | 2.45E-02 | 4.40 (17665,73,440,8)    |
| <a href="#">GO:1901292</a> | nucleoside phosphate catabolic process                                  | 4.55E-04 | 2.45E-02 | 3.62 (17665,111,440,10)  |
| <a href="#">GO:0010971</a> | positive regulation of G2/M transition of mitotic cell cycle            | 4.81E-04 | 2.59E-02 | 7.43 (17665,27,440,5)    |
| <a href="#">GO:0044818</a> | mitotic G2/M transition checkpoint                                      | 4.81E-04 | 2.58E-02 | 7.43 (17665,27,440,5)    |
| <a href="#">GO:0002639</a> | positive regulation of immunoglobulin production                        | 4.96E-04 | 2.65E-02 | 5.88 (17665,41,440,6)    |
| <a href="#">GO:0010216</a> | maintenance of DNA methylation                                          | 4.99E-04 | 2.65E-02 | 17.21 (17665,7,440,3)    |
| <a href="#">GO:0051305</a> | chromosome movement towards spindle pole                                | 4.99E-04 | 2.64E-02 | 17.21 (17665,7,440,3)    |
| <a href="#">GO:0009221</a> | pyrimidine deoxyribonucleotide biosynthetic process                     | 4.99E-04 | 2.63E-02 | 17.21 (17665,7,440,3)    |
| <a href="#">GO:1901137</a> | carbohydrate derivative biosynthetic process                            | 5.19E-04 | 2.73E-02 | 2.15 (17665,430,440,23)  |
| <a href="#">GO:0007099</a> | centriole replication                                                   | 5.45E-04 | 2.86E-02 | 10.04 (17665,16,440,4)   |
| <a href="#">GO:0043044</a> | ATP-dependent chromatin remodeling                                      | 5.45E-04 | 2.85E-02 | 4.28 (17665,75,440,8)    |
| <a href="#">GO:0009127</a> | purine nucleoside monophosphate biosynthetic process                    | 5.45E-04 | 2.84E-02 | 4.28 (17665,75,440,8)    |
| <a href="#">GO:0000079</a> | regulation of cyclin-dependent protein serine/threonine kinase activity | 5.57E-04 | 2.89E-02 | 3.84 (17665,94,440,9)    |
| <a href="#">GO:0051128</a> | regulation of cellular component organization                           | 5.65E-04 | 2.93E-02 | 1.41 (17665,2455,440,86) |
| <a href="#">GO:0051642</a> | centrosome localization                                                 | 5.74E-04 | 2.96E-02 | 7.17 (17665,28,440,5)    |
| <a href="#">GO:0019439</a> | aromatic compound catabolic process                                     | 5.98E-04 | 3.08E-02 | 2.09 (17665,462,440,24)  |
| <a href="#">GO:0033567</a> | DNA replication, Okazaki fragment processing                            | 6.19E-04 | 3.17E-02 | 40.15 (17665,2,440,2)    |

|                            |                                                         |          |          |                              |
|----------------------------|---------------------------------------------------------|----------|----------|------------------------------|
| <a href="#">GO:0046271</a> | phenylpropanoid catabolic process                       | 6.19E-04 | 3.16E-02 | 40.15 (17665,2,440,2)        |
| <a href="#">GO:0046226</a> | coumarin catabolic process                              | 6.19E-04 | 3.15E-02 | 40.15 (17665,2,440,2)        |
| <a href="#">GO:0046365</a> | monosaccharide catabolic process                        | 6.33E-04 | 3.21E-02 | 4.76 (17665,59,440,7)        |
| <a href="#">GO:1901361</a> | organic cyclic compound catabolic process               | 6.76E-04 | 3.42E-02 | 2.03 (17665,494,440,25)      |
| <a href="#">GO:0061842</a> | microtubule organizing center localization              | 6.79E-04 | 3.42E-02 | 6.92 (17665,29,440,5)        |
| <a href="#">GO:0007096</a> | regulation of exit from mitosis                         | 6.98E-04 | 3.51E-02 | 9.45 (17665,17,440,4)        |
| <a href="#">GO:0051782</a> | negative regulation of cell division                    | 6.98E-04 | 3.50E-02 | 9.45 (17665,17,440,4)        |
| <a href="#">GO:0009200</a> | deoxyribonucleoside triphosphate metabolic process      | 6.98E-04 | 3.49E-02 | 9.45 (17665,17,440,4)        |
| <a href="#">GO:0046653</a> | tetrahydrofolate metabolic process                      | 6.98E-04 | 3.48E-02 | 9.45 (17665,17,440,4)        |
| <a href="#">GO:0009117</a> | nucleotide metabolic process                            | 7.17E-04 | 3.56E-02 | 2.06 (17665,468,440,24)      |
| <a href="#">GO:0060249</a> | anatomical structure homeostasis                        | 7.46E-04 | 3.69E-02 | 2.42 (17665,282,440,17)      |
| <a href="#">GO:0009132</a> | nucleoside diphosphate metabolic process                | 7.73E-04 | 3.81E-02 | 4.07 (17665,79,440,8)        |
| <a href="#">GO:0009206</a> | purine ribonucleoside triphosphate biosynthetic process | 7.75E-04 | 3.81E-02 | 4.61 (17665,61,440,7)        |
| <a href="#">GO:0009179</a> | purine ribonucleoside diphosphate metabolic process     | 7.75E-04 | 3.80E-02 | 4.61 (17665,61,440,7)        |
| <a href="#">GO:0009135</a> | purine nucleoside diphosphate metabolic process         | 7.75E-04 | 3.79E-02 | 4.61 (17665,61,440,7)        |
| <a href="#">GO:0048518</a> | positive regulation of biological process               | 7.82E-04 | 3.81E-02 | 1.22<br>(17665,5832,440,177) |
| <a href="#">GO:0034723</a> | DNA replication-dependent nucleosome organization       | 7.83E-04 | 3.80E-02 | 15.06 (17665,8,440,3)        |
| <a href="#">GO:0006335</a> | DNA replication-dependent nucleosome assembly           | 7.83E-04 | 3.79E-02 | 15.06 (17665,8,440,3)        |
| <a href="#">GO:1901993</a> | regulation of meiotic cell cycle phase transition       | 7.83E-04 | 3.78E-02 | 15.06 (17665,8,440,3)        |
| <a href="#">GO:0075713</a> | establishment of integrated proviral latency            | 7.83E-04 | 3.76E-02 | 15.06 (17665,8,440,3)        |
| <a href="#">GO:0090235</a> | regulation of metaphase plate congression               | 7.83E-04 | 3.75E-02 | 15.06 (17665,8,440,3)        |
| <a href="#">GO:0051299</a> | centrosome separation                                   | 7.83E-04 | 3.74E-02 | 15.06 (17665,8,440,3)        |
| <a href="#">GO:0009157</a> | deoxyribonucleoside monophosphate biosynthetic process  | 7.83E-04 | 3.73E-02 | 15.06 (17665,8,440,3)        |
| <a href="#">GO:0006284</a> | base-excision repair                                    | 7.98E-04 | 3.79E-02 | 6.69 (17665,30,440,5)        |
| <a href="#">GO:0031297</a> | replication fork processing                             | 7.98E-04 | 3.78E-02 | 6.69 (17665,30,440,5)        |
| <a href="#">GO:1901976</a> | regulation of cell cycle checkpoint                     | 7.98E-04 | 3.77E-02 | 6.69 (17665,30,440,5)        |
| <a href="#">GO:0046700</a> | heterocycle catabolic process                           | 8.28E-04 | 3.89E-02 | 2.08 (17665,445,440,23)      |
| <a href="#">GO:0009145</a> | purine nucleoside triphosphate biosynthetic process     | 8.56E-04 | 4.01E-02 | 4.53 (17665,62,440,7)        |
| <a href="#">GO:0016445</a> | somatic diversification of immunoglobulins              | 9.33E-04 | 4.36E-02 | 6.48 (17665,31,440,5)        |
| <a href="#">GO:0051321</a> | meiotic cell cycle                                      | 9.42E-04 | 4.39E-02 | 4.46 (17665,63,440,7)        |

**Enriched gene sets in 4-1BB<sup>neg</sup> cells**

| GO term                    | Description                                               | P-value  | FDR q-value | Enrichment (N, B, n, b)      |
|----------------------------|-----------------------------------------------------------|----------|-------------|------------------------------|
| <a href="#">GO:0010941</a> | <b>regulation of cell death</b>                           | 3.98E-09 | 2.28E-06    | 1.85<br>(17665,1621,541,92)  |
| <a href="#">GO:0042981</a> | <b>regulation of apoptotic process</b>                    | 9.79E-09 | 4.89E-06    | 1.88<br>(17665,1479,541,85)  |
| <a href="#">GO:0048585</a> | <b>negative regulation of response to stimulus</b>        | 1.04E-08 | 5.05E-06    | 1.84<br>(17665,1579,541,89)  |
| <a href="#">GO:0031324</a> | <b>negative regulation of cellular metabolic process</b>  | 1.91E-08 | 7.76E-06    | 1.62<br>(17665,2502,541,124) |
| <a href="#">GO:0002698</a> | <b>negative regulation of immune effector process</b>     | 4.38E-06 | 6.40E-04    | 4.05<br>(17665,121,541,15)   |
| <a href="#">GO:1902532</a> | negative regulation of intracellular signal transduction  | 1.14E-08 | 5.18E-06    | 2.67<br>(17665,501,541,41)   |
| <a href="#">GO:0032269</a> | negative regulation of cellular protein metabolic process | 2.30E-07 | 6.03E-05    | 1.99<br>(17665,1003,541,61)  |
| <a href="#">GO:0048519</a> | negative regulation of biological process                 | 7.96E-08 | 2.68E-05    | 1.36<br>(17665,5112,541,213) |
| <a href="#">GO:0019222</a> | regulation of metabolic process                           | 1.90E-10 | 2.45E-07    | 1.36<br>(17665,6503,541,270) |
| <a href="#">GO:0043065</a> | positive regulation of apoptotic process                  | 2.21E-10 | 2.63E-07    | 2.65<br>(17665,628,541,51)   |



|                            |                                                   |          |          |                               |
|----------------------------|---------------------------------------------------|----------|----------|-------------------------------|
| <a href="#">GO:0065007</a> | biological regulation                             | 2.27E-10 | 2.51E-07 | 1.19<br>(17665,11627,541,422) |
| <a href="#">GO:0001817</a> | regulation of cytokine production                 | 2.75E-10 | 2.84E-07 | 2.55<br>(17665,692,541,54)    |
| <a href="#">GO:0043068</a> | positive regulation of programmed cell death      | 3.09E-10 | 2.99E-07 | 2.63<br>(17665,634,541,51)    |
| <a href="#">GO:0031323</a> | regulation of cellular metabolic process          | 3.13E-10 | 2.85E-07 | 1.38<br>(17665,6006,541,253)  |
| <a href="#">GO:0050794</a> | regulation of cellular process                    | 3.24E-10 | 2.78E-07 | 1.22<br>(17665,10323,541,385) |
| <a href="#">GO:0010942</a> | positive regulation of cell death                 | 5.52E-10 | 4.50E-07 | 2.53<br>(17665,685,541,53)    |
| <a href="#">GO:0032268</a> | regulation of cellular protein metabolic process  | 6.82E-10 | 5.28E-07 | 1.68<br>(17665,2552,541,131)  |
| <a href="#">GO:0080090</a> | regulation of primary metabolic process           | 1.17E-09 | 8.65E-07 | 1.37<br>(17665,5865,541,246)  |
| <a href="#">GO:0065009</a> | regulation of molecular function                  | 1.49E-09 | 1.05E-06 | 1.61<br>(17665,2904,541,143)  |
| <a href="#">GO:0051246</a> | regulation of protein metabolic process           | 1.73E-09 | 1.16E-06 | 1.63<br>(17665,2722,541,136)  |
| <a href="#">GO:0046649</a> | lymphocyte activation                             | 3.53E-09 | 2.28E-06 | 3.15<br>(17665,352,541,34)    |
| <a href="#">GO:0043067</a> | regulation of programmed cell death               | 3.73E-09 | 2.31E-06 | 1.90<br>(17665,1497,541,87)   |
| <a href="#">GO:0051171</a> | regulation of nitrogen compound metabolic process | 3.87E-09 | 2.31E-06 | 1.37<br>(17665,5689,541,238)  |
| <a href="#">GO:0002376</a> | immune system process                             | 6.12E-21 | 9.47E-17 | 2.20<br>(17665,2133,541,144)  |
| <a href="#">GO:0045321</a> | leukocyte activation                              | 6.74E-14 | 5.22E-10 | 2.63<br>(17665,882,541,71)    |
| <a href="#">GO:0001775</a> | cell activation                                   | 1.28E-13 | 6.63E-10 | 2.49<br>(17665,996,541,76)    |
| <a href="#">GO:0007166</a> | cell surface receptor signaling pathway           | 1.59E-13 | 6.15E-10 | 1.92<br>(17665,2142,541,126)  |
| <a href="#">GO:0002682</a> | regulation of immune system process               | 4.66E-13 | 1.44E-09 | 2.12<br>(17665,1506,541,98)   |
| <a href="#">GO:0002252</a> | immune effector process                           | 6.87E-13 | 1.77E-09 | 2.51<br>(17665,925,541,71)    |
| <a href="#">GO:0048583</a> | regulation of response to stimulus                | 1.42E-12 | 3.15E-09 | 1.57<br>(17665,4043,541,195)  |
| <a href="#">GO:0050789</a> | regulation of biological process                  | 2.43E-11 | 4.71E-08 | 1.21<br>(17665,10991,541,408) |
| <a href="#">GO:1902531</a> | regulation of intracellular signal transduction   | 3.19E-11 | 5.48E-08 | 1.90<br>(17665,1836,541,107)  |
| <a href="#">GO:0050776</a> | regulation of immune response                     | 7.59E-11 | 1.17E-07 | 2.30<br>(17665,980,541,69)    |
| <a href="#">GO:0048518</a> | positive regulation of biological process         | 1.19E-10 | 1.67E-07 | 1.39<br>(17665,5832,541,249)  |
| <a href="#">GO:0048522</a> | positive regulation of cellular process           | 2.46E-08 | 9.75E-06 | 1.37<br>(17665,5162,541,217)  |
| <a href="#">GO:0031399</a> | regulation of protein modification process        | 3.02E-08 | 1.17E-05 | 1.75<br>(17665,1791,541,96)   |
| <a href="#">GO:0042110</a> | T cell activation                                 | 3.71E-08 | 1.40E-05 | 3.70<br>(17665,212,541,24)    |
| <a href="#">GO:0002521</a> | leukocyte differentiation                         | 3.73E-08 | 1.38E-05 | 3.20<br>(17665,296,541,29)    |
| <a href="#">GO:0050900</a> | leukocyte migration                               | 5.01E-08 | 1.80E-05 | 3.16<br>(17665,300,541,29)    |
| <a href="#">GO:0030217</a> | T cell differentiation                            | 6.79E-08 | 2.39E-05 | 4.87<br>(17665,114,541,17)    |
| <a href="#">GO:0009896</a> | positive regulation of catabolic process          | 7.74E-08 | 2.66E-05 | 2.69<br>(17665,437,541,36)    |
| <a href="#">GO:0007165</a> | signal transduction                               | 8.11E-08 | 2.67E-05 | 1.39<br>(17665,4607,541,196)  |
| <a href="#">GO:0050896</a> | response to stimulus                              | 9.77E-08 | 3.15E-05 | 1.35<br>(17665,5275,541,218)  |
| <a href="#">GO:0043549</a> | regulation of kinase activity                     | 9.86E-08 | 3.11E-05 | 2.11<br>(17665,865,541,56)    |
| <a href="#">GO:0009966</a> | regulation of signal transduction                 | 9.93E-08 | 3.07E-05 | 1.52<br>(17665,3013,541,140)  |
| <a href="#">GO:0042325</a> | regulation of phosphorylation                     | 1.02E-07 | 3.09E-05 | 1.78<br>(17665,1558,541,85)   |

|                            |                                                            |          |          |                              |
|----------------------------|------------------------------------------------------------|----------|----------|------------------------------|
| <a href="#">GO:0009892</a> | negative regulation of metabolic process                   | 1.17E-07 | 3.49E-05 | 1.54<br>(17665,2828,541,133) |
| <a href="#">GO:0030155</a> | regulation of cell adhesion                                | 1.35E-07 | 3.96E-05 | 2.25<br>(17665,696,541,48)   |
| <a href="#">GO:0030098</a> | lymphocyte differentiation                                 | 1.43E-07 | 4.11E-05 | 3.56<br>(17665,211,541,23)   |
| <a href="#">GO:0048523</a> | negative regulation of cellular process                    | 1.47E-07 | 4.14E-05 | 1.38<br>(17665,4583,541,194) |
| <a href="#">GO:0080134</a> | regulation of response to stress                           | 1.51E-07 | 4.16E-05 | 1.78<br>(17665,1522,541,83)  |
| <a href="#">GO:0051248</a> | negative regulation of protein metabolic process           | 1.56E-07 | 4.25E-05 | 1.97<br>(17665,1062,541,64)  |
| <a href="#">GO:0070887</a> | cellular response to chemical stimulus                     | 2.20E-07 | 5.88E-05 | 1.73<br>(17665,1662,541,88)  |
| <a href="#">GO:0009968</a> | negative regulation of signal transduction                 | 2.31E-07 | 5.95E-05 | 1.88<br>(17665,1217,541,70)  |
| <a href="#">GO:0051716</a> | cellular response to stimulus                              | 2.93E-07 | 7.43E-05 | 1.52<br>(17665,2790,541,130) |
| <a href="#">GO:0071310</a> | cellular response to organic substance                     | 2.94E-07 | 7.33E-05 | 1.82<br>(17665,1347,541,75)  |
| <a href="#">GO:0019220</a> | regulation of phosphate metabolic process                  | 3.03E-07 | 7.45E-05 | 1.70<br>(17665,1751,541,91)  |
| <a href="#">GO:0051174</a> | regulation of phosphorus metabolic process                 | 3.11E-07 | 7.52E-05 | 1.70<br>(17665,1752,541,91)  |
| <a href="#">GO:0031329</a> | regulation of cellular catabolic process                   | 3.61E-07 | 8.60E-05 | 2.05<br>(17665,877,541,55)   |
| <a href="#">GO:0006955</a> | immune response                                            | 4.36E-07 | 1.02E-04 | 1.98<br>(17665,975,541,59)   |
| <a href="#">GO:0001819</a> | positive regulation of cytokine production                 | 5.20E-07 | 1.20E-04 | 2.57<br>(17665,432,541,34)   |
| <a href="#">GO:1902105</a> | regulation of leukocyte differentiation                    | 5.79E-07 | 1.32E-04 | 3.02<br>(17665,281,541,26)   |
| <a href="#">GO:0010646</a> | regulation of cell communication                           | 5.82E-07 | 1.31E-04 | 1.45<br>(17665,3386,541,150) |
| <a href="#">GO:0031347</a> | regulation of defense response                             | 6.30E-07 | 1.39E-04 | 2.08<br>(17665,801,541,51)   |
| <a href="#">GO:0001932</a> | regulation of protein phosphorylation                      | 6.35E-07 | 1.38E-04 | 1.77<br>(17665,1399,541,76)  |
| <a href="#">GO:0051172</a> | negative regulation of nitrogen compound metabolic process | 6.71E-07 | 1.44E-04 | 1.56<br>(17665,2339,541,112) |
| <a href="#">GO:0045859</a> | regulation of protein kinase activity                      | 7.67E-07 | 1.63E-04 | 2.10<br>(17665,761,541,49)   |
| <a href="#">GO:0035556</a> | intracellular signal transduction                          | 7.74E-07 | 1.62E-04 | 1.71<br>(17665,1583,541,83)  |
| <a href="#">GO:0002764</a> | immune response-regulating signaling pathway               | 7.91E-07 | 1.63E-04 | 2.52<br>(17665,440,541,34)   |
| <a href="#">GO:0031325</a> | positive regulation of cellular metabolic process          | 8.87E-07 | 1.81E-04 | 1.45<br>(17665,3239,541,144) |
| <a href="#">GO:0002683</a> | negative regulation of immune system process               | 9.24E-07 | 1.86E-04 | 2.51<br>(17665,443,541,34)   |
| <a href="#">GO:0002757</a> | immune response-activating signal transduction             | 1.09E-06 | 2.17E-04 | 2.57<br>(17665,406,541,32)   |
| <a href="#">GO:0002274</a> | myeloid leukocyte activation                               | 1.10E-06 | 2.16E-04 | 2.28<br>(17665,572,541,40)   |
| <a href="#">GO:0002697</a> | regulation of immune effector process                      | 1.14E-06 | 2.22E-04 | 2.62<br>(17665,387,541,31)   |
| <a href="#">GO:0023051</a> | regulation of signaling                                    | 1.19E-06 | 2.27E-04 | 1.43<br>(17665,3426,541,150) |
| <a href="#">GO:0051249</a> | regulation of lymphocyte activation                        | 1.21E-06 | 2.28E-04 | 2.52<br>(17665,428,541,33)   |
| <a href="#">GO:0010508</a> | positive regulation of autophagy                           | 1.23E-06 | 2.30E-04 | 4.21<br>(17665,124,541,16)   |
| <a href="#">GO:0006950</a> | response to stress                                         | 1.42E-06 | 2.62E-04 | 1.47<br>(17665,2955,541,133) |
| <a href="#">GO:0006952</a> | defense response                                           | 1.49E-06 | 2.71E-04 | 1.84<br>(17665,1133,541,64)  |
| <a href="#">GO:0010506</a> | regulation of autophagy                                    | 1.56E-06 | 2.81E-04 | 2.74<br>(17665,334,541,28)   |
| <a href="#">GO:0045637</a> | regulation of myeloid cell differentiation                 | 1.72E-06 | 3.05E-04 | 3.19<br>(17665,225,541,22)   |
| <a href="#">GO:0010648</a> | negative regulation of cell communication                  | 1.74E-06 | 3.07E-04 | 1.77<br>(17665,1311,541,71)  |

|                            |                                                                 |          |          |                               |
|----------------------------|-----------------------------------------------------------------|----------|----------|-------------------------------|
| <a href="#">GO:0051056</a> | regulation of small GTPase mediated signal transduction         | 1.77E-06 | 3.08E-04 | 2.78<br>(17665,317,541,27)    |
| <a href="#">GO:0051338</a> | regulation of transferase activity                              | 1.81E-06 | 3.12E-04 | 1.92<br>(17665,971,541,57)    |
| <a href="#">GO:0023057</a> | negative regulation of signaling                                | 1.89E-06 | 3.22E-04 | 1.76<br>(17665,1314,541,71)   |
| <a href="#">GO:0002366</a> | leukocyte activation involved in immune response                | 1.95E-06 | 3.28E-04 | 2.21<br>(17665,607,541,41)    |
| <a href="#">GO:0010605</a> | negative regulation of macromolecule metabolic process          | 2.01E-06 | 3.35E-04 | 1.50<br>(17665,2584,541,119)  |
| <a href="#">GO:0002263</a> | cell activation involved in immune response                     | 2.21E-06 | 3.63E-04 | 2.19<br>(17665,610,541,41)    |
| <a href="#">GO:0009893</a> | positive regulation of metabolic process                        | 2.34E-06 | 3.81E-04 | 1.41<br>(17665,3523,541,152)  |
| <a href="#">GO:0050863</a> | regulation of T cell activation                                 | 2.39E-06 | 3.85E-04 | 2.74<br>(17665,322,541,27)    |
| <a href="#">GO:0046632</a> | alpha-beta T cell differentiation                               | 2.60E-06 | 4.15E-04 | 7.35 (17665,40,541,9)         |
| <a href="#">GO:0009615</a> | response to virus                                               | 2.69E-06 | 4.25E-04 | 2.85<br>(17665,286,541,25)    |
| <a href="#">GO:0009894</a> | regulation of catabolic process                                 | 2.91E-06 | 4.55E-04 | 1.89<br>(17665,986,541,57)    |
| <a href="#">GO:0010033</a> | response to organic substance                                   | 2.97E-06 | 4.59E-04 | 1.56<br>(17665,2113,541,101)  |
| <a href="#">GO:1903037</a> | regulation of leukocyte cell-cell adhesion                      | 3.44E-06 | 5.28E-04 | 2.75<br>(17665,309,541,26)    |
| <a href="#">GO:0009967</a> | positive regulation of signal transduction                      | 3.81E-06 | 5.79E-04 | 1.66<br>(17665,1596,541,81)   |
| <a href="#">GO:0002253</a> | activation of immune response                                   | 4.14E-06 | 6.23E-04 | 2.34<br>(17665,474,541,34)    |
| <a href="#">GO:0009628</a> | response to abiotic stimulus                                    | 4.18E-06 | 6.22E-04 | 1.85<br>(17665,1022,541,58)   |
| <a href="#">GO:0002831</a> | regulation of response to biotic stimulus                       | 4.23E-06 | 6.23E-04 | 3.84<br>(17665,136,541,16)    |
| <a href="#">GO:0006986</a> | response to unfolded protein                                    | 4.69E-06 | 6.79E-04 | 5.44 (17665,66,541,11)        |
| <a href="#">GO:0045785</a> | positive regulation of cell adhesion                            | 4.89E-06 | 7.00E-04 | 2.44<br>(17665,415,541,31)    |
| <a href="#">GO:0022407</a> | regulation of cell-cell adhesion                                | 5.13E-06 | 7.29E-04 | 2.43<br>(17665,416,541,31)    |
| <a href="#">GO:0042221</a> | response to chemical                                            | 6.20E-06 | 8.72E-04 | 1.47<br>(17665,2616,541,118)  |
| <a href="#">GO:0050865</a> | regulation of cell activation                                   | 6.83E-06 | 9.53E-04 | 2.20<br>(17665,550,541,37)    |
| <a href="#">GO:1903039</a> | positive regulation of leukocyte cell-cell adhesion             | 7.04E-06 | 9.74E-04 | 3.02<br>(17665,227,541,21)    |
| <a href="#">GO:0042119</a> | neutrophil activation                                           | 7.41E-06 | 1.02E-03 | 2.28<br>(17665,487,541,34)    |
| <a href="#">GO:0002694</a> | regulation of leukocyte activation                              | 7.90E-06 | 1.07E-03 | 2.24<br>(17665,510,541,35)    |
| <a href="#">GO:0009987</a> | cellular process                                                | 7.97E-06 | 1.07E-03 | 1.10<br>(17665,13415,541,452) |
| <a href="#">GO:0036230</a> | granulocyte activation                                          | 9.21E-06 | 1.23E-03 | 2.26<br>(17665,492,541,34)    |
| <a href="#">GO:0001776</a> | leukocyte homeostasis                                           | 9.29E-06 | 1.23E-03 | 5.63 (17665,58,541,10)        |
| <a href="#">GO:0009607</a> | response to biotic stimulus                                     | 1.02E-05 | 1.34E-03 | 1.89<br>(17665,883,541,51)    |
| <a href="#">GO:0090084</a> | negative regulation of inclusion body assembly                  | 1.05E-05 | 1.36E-03 | 14.84 (17665,11,541,5)        |
| <a href="#">GO:0050688</a> | regulation of defense response to virus                         | 1.12E-05 | 1.44E-03 | 4.99 (17665,72,541,11)        |
| <a href="#">GO:1903706</a> | regulation of hemopoiesis                                       | 1.19E-05 | 1.52E-03 | 2.30<br>(17665,455,541,32)    |
| <a href="#">GO:0051251</a> | positive regulation of lymphocyte activation                    | 1.38E-05 | 1.76E-03 | 2.73<br>(17665,275,541,23)    |
| <a href="#">GO:0071901</a> | negative regulation of protein serine/threonine kinase activity | 1.41E-05 | 1.77E-03 | 3.68<br>(17665,133,541,15)    |
| <a href="#">GO:0002761</a> | regulation of myeloid leukocyte differentiation                 | 1.52E-05 | 1.89E-03 | 3.87<br>(17665,118,541,14)    |
| <a href="#">GO:0051239</a> | regulation of multicellular organismal process                  | 1.60E-05 | 1.98E-03 | 1.41<br>(17665,3066,541,132)  |
| <a href="#">GO:0035966</a> | response to topologically incorrect protein                     | 1.67E-05 | 2.05E-03 | 4.79 (17665,75,541,11)        |

|                            |                                                                    |          |          |                              |
|----------------------------|--------------------------------------------------------------------|----------|----------|------------------------------|
| <a href="#">GO:0031400</a> | negative regulation of protein modification process                | 1.76E-05 | 2.15E-03 | 2.10<br>(17665,574,541,37)   |
| <a href="#">GO:0032479</a> | regulation of type I interferon production                         | 1.84E-05 | 2.23E-03 | 3.81<br>(17665,120,541,14)   |
| <a href="#">GO:0019538</a> | protein metabolic process                                          | 1.85E-05 | 2.22E-03 | 1.34<br>(17665,3888,541,160) |
| <a href="#">GO:1900034</a> | regulation of cellular response to heat                            | 1.90E-05 | 2.26E-03 | 4.73 (17665,76,541,11)       |
| <a href="#">GO:0010638</a> | positive regulation of organelle organization                      | 1.93E-05 | 2.29E-03 | 2.07<br>(17665,599,541,38)   |
| <a href="#">GO:0032101</a> | regulation of response to external stimulus                        | 1.94E-05 | 2.28E-03 | 1.88<br>(17665,832,541,48)   |
| <a href="#">GO:0010647</a> | positive regulation of cell communication                          | 1.96E-05 | 2.28E-03 | 1.57<br>(17665,1748,541,84)  |
| <a href="#">GO:0043207</a> | response to external biotic stimulus                               | 2.06E-05 | 2.38E-03 | 1.86<br>(17665,858,541,49)   |
| <a href="#">GO:0050870</a> | positive regulation of T cell activation                           | 2.28E-05 | 2.62E-03 | 2.98<br>(17665,208,541,19)   |
| <a href="#">GO:1902107</a> | positive regulation of leukocyte differentiation                   | 2.44E-05 | 2.78E-03 | 3.35<br>(17665,156,541,16)   |
| <a href="#">GO:0043299</a> | leukocyte degranulation                                            | 2.48E-05 | 2.80E-03 | 2.18<br>(17665,494,541,33)   |
| <a href="#">GO:0046631</a> | alpha-beta T cell activation                                       | 2.52E-05 | 2.83E-03 | 5.65 (17665,52,541,9)        |
| <a href="#">GO:0016239</a> | positive regulation of macroautophagy                              | 2.63E-05 | 2.93E-03 | 5.02 (17665,65,541,10)       |
| <a href="#">GO:0001816</a> | cytokine production                                                | 2.67E-05 | 2.96E-03 | 3.69<br>(17665,124,541,14)   |
| <a href="#">GO:0043312</a> | neutrophil degranulation                                           | 2.67E-05 | 2.94E-03 | 2.20<br>(17665,474,541,32)   |
| <a href="#">GO:0002832</a> | negative regulation of response to biotic stimulus                 | 2.88E-05 | 3.14E-03 | 6.37 (17665,41,541,8)        |
| <a href="#">GO:0022409</a> | positive regulation of cell-cell adhesion                          | 2.99E-05 | 3.24E-03 | 2.67<br>(17665,269,541,22)   |
| <a href="#">GO:0060337</a> | type I interferon signaling pathway                                | 3.02E-05 | 3.24E-03 | 4.95 (17665,66,541,10)       |
| <a href="#">GO:0002283</a> | neutrophil activation involved in immune response                  | 3.15E-05 | 3.36E-03 | 2.19<br>(17665,478,541,32)   |
| <a href="#">GO:0051336</a> | regulation of hydrolase activity                                   | 3.19E-05 | 3.38E-03 | 1.68<br>(17665,1247,541,64)  |
| <a href="#">GO:0046634</a> | regulation of alpha-beta T cell activation                         | 3.26E-05 | 3.44E-03 | 4.12 (17665,95,541,12)       |
| <a href="#">GO:0071900</a> | regulation of protein serine/threonine kinase activity             | 3.28E-05 | 3.43E-03 | 2.15<br>(17665,501,541,33)   |
| <a href="#">GO:0002819</a> | regulation of adaptive immune response                             | 3.34E-05 | 3.47E-03 | 3.27<br>(17665,160,541,16)   |
| <a href="#">GO:0010604</a> | positive regulation of macromolecule metabolic process             | 3.51E-05 | 3.63E-03 | 1.37<br>(17665,3231,541,136) |
| <a href="#">GO:0051173</a> | positive regulation of nitrogen compound metabolic process         | 3.52E-05 | 3.61E-03 | 1.39<br>(17665,3087,541,131) |
| <a href="#">GO:0050867</a> | positive regulation of cell activation                             | 3.52E-05 | 3.59E-03 | 2.46<br>(17665,332,541,25)   |
| <a href="#">GO:0051704</a> | multi-organism process                                             | 3.54E-05 | 3.58E-03 | 1.60<br>(17665,1511,541,74)  |
| <a href="#">GO:0051607</a> | defense response to virus                                          | 3.72E-05 | 3.74E-03 | 2.98<br>(17665,197,541,18)   |
| <a href="#">GO:1901652</a> | response to peptide                                                | 3.80E-05 | 3.79E-03 | 2.35<br>(17665,375,541,27)   |
| <a href="#">GO:0023056</a> | positive regulation of signaling                                   | 3.99E-05 | 3.96E-03 | 1.54<br>(17665,1756,541,83)  |
| <a href="#">GO:0061077</a> | chaperone-mediated protein folding                                 | 4.02E-05 | 3.96E-03 | 5.34 (17665,55,541,9)        |
| <a href="#">GO:0002768</a> | immune response-regulating cell surface receptor signaling pathway | 4.29E-05 | 4.20E-03 | 2.43<br>(17665,336,541,25)   |
| <a href="#">GO:0006464</a> | cellular protein modification process                              | 4.29E-05 | 4.18E-03 | 1.40<br>(17665,2899,541,124) |
| <a href="#">GO:0036211</a> | protein modification process                                       | 4.29E-05 | 4.15E-03 | 1.40<br>(17665,2899,541,124) |
| <a href="#">GO:1902533</a> | positive regulation of intracellular signal transduction           | 4.61E-05 | 4.43E-03 | 1.73<br>(17665,1059,541,56)  |
| <a href="#">GO:0002275</a> | myeloid cell activation involved in immune response                | 4.65E-05 | 4.45E-03 | 2.11<br>(17665,510,541,33)   |
| <a href="#">GO:0050777</a> | negative regulation of immune response                             | 5.00E-05 | 4.75E-03 | 3.31<br>(17665,148,541,15)   |

|                            |                                                                    |          |          |                             |
|----------------------------|--------------------------------------------------------------------|----------|----------|-----------------------------|
| <a href="#">GO:0002696</a> | positive regulation of leukocyte activation                        | 5.10E-05 | 4.81E-03 | 2.46<br>(17665,319,541,24)  |
| <a href="#">GO:0045332</a> | phospholipid translocation                                         | 5.19E-05 | 4.87E-03 | 8.52 (17665,23,541,6)       |
| <a href="#">GO:0030334</a> | regulation of cell migration                                       | 5.36E-05 | 5.00E-03 | 1.82<br>(17665,842,541,47)  |
| <a href="#">GO:0051058</a> | negative regulation of small GTPase mediated signal transduction   | 5.38E-05 | 4.99E-03 | 5.16 (17665,57,541,9)       |
| <a href="#">GO:2000271</a> | positive regulation of fibroblast apoptotic process                | 5.52E-05 | 5.09E-03 | 16.33 (17665,8,541,4)       |
| <a href="#">GO:0040012</a> | regulation of locomotion                                           | 6.15E-05 | 5.63E-03 | 1.75<br>(17665,970,541,52)  |
| <a href="#">GO:0002429</a> | immune response-activating cell surface receptor signaling pathway | 6.35E-05 | 5.79E-03 | 2.48<br>(17665,303,541,23)  |
| <a href="#">GO:0001818</a> | negative regulation of cytokine production                         | 6.75E-05 | 6.11E-03 | 2.60<br>(17665,264,541,21)  |
| <a href="#">GO:1901698</a> | response to nitrogen compound                                      | 7.23E-05 | 6.50E-03 | 1.79<br>(17665,877,541,48)  |
| <a href="#">GO:0002431</a> | Fc receptor mediated stimulatory signaling pathway                 | 7.33E-05 | 6.56E-03 | 4.47 (17665,73,541,10)      |
| <a href="#">GO:0046578</a> | regulation of Ras protein signal transduction                      | 7.39E-05 | 6.57E-03 | 2.94<br>(17665,189,541,17)  |
| <a href="#">GO:0048872</a> | homeostasis of number of cells                                     | 7.93E-05 | 7.02E-03 | 3.54<br>(17665,120,541,13)  |
| <a href="#">GO:0090083</a> | regulation of inclusion body assembly                              | 8.73E-05 | 7.68E-03 | 10.20 (17665,16,541,5)      |
| <a href="#">GO:2000514</a> | regulation of CD4-positive, alpha-beta T cell activation           | 9.31E-05 | 8.14E-03 | 4.82 (17665,61,541,9)       |
| <a href="#">GO:0046635</a> | positive regulation of alpha-beta T cell activation                | 9.31E-05 | 8.10E-03 | 4.82 (17665,61,541,9)       |
| <a href="#">GO:0010243</a> | response to organonitrogen compound                                | 9.43E-05 | 8.15E-03 | 1.81<br>(17665,813,541,45)  |
| <a href="#">GO:0042127</a> | regulation of cell proliferation                                   | 9.53E-05 | 8.20E-03 | 1.55<br>(17665,1585,541,75) |
| <a href="#">GO:0009266</a> | response to temperature stimulus                                   | 9.85E-05 | 8.42E-03 | 3.12<br>(17665,157,541,15)  |
| <a href="#">GO:0033043</a> | regulation of organelle organization                               | 9.91E-05 | 8.43E-03 | 1.63<br>(17665,1244,541,62) |
| <a href="#">GO:0016192</a> | vesicle-mediated transport                                         | 9.96E-05 | 8.42E-03 | 1.54<br>(17665,1614,541,76) |
| <a href="#">GO:0043434</a> | response to peptide hormone                                        | 1.02E-04 | 8.56E-03 | 2.46<br>(17665,292,541,22)  |
| <a href="#">GO:0009605</a> | response to external stimulus                                      | 1.03E-04 | 8.66E-03 | 1.56<br>(17665,1509,541,72) |
| <a href="#">GO:0044093</a> | positive regulation of molecular function                          | 1.06E-04 | 8.80E-03 | 1.51<br>(17665,1752,541,81) |
| <a href="#">GO:0034204</a> | lipid translocation                                                | 1.10E-04 | 9.07E-03 | 7.54 (17665,26,541,6)       |
| <a href="#">GO:0034157</a> | positive regulation of toll-like receptor 7 signaling pathway      | 1.12E-04 | 9.20E-03 | 24.49 (17665,4,541,3)       |
| <a href="#">GO:0006458</a> | 'de novo' protein folding                                          | 1.13E-04 | 9.22E-03 | 6.18 (17665,37,541,7)       |
| <a href="#">GO:0043900</a> | regulation of multi-organism process                               | 1.13E-04 | 9.22E-03 | 2.20<br>(17665,400,541,27)  |
| <a href="#">GO:0009725</a> | response to hormone                                                | 1.15E-04 | 9.32E-03 | 1.89<br>(17665,675,541,39)  |
| <a href="#">GO:0046637</a> | regulation of alpha-beta T cell differentiation                    | 1.20E-04 | 9.70E-03 | 4.66 (17665,63,541,9)       |
| <a href="#">GO:1903708</a> | positive regulation of hemopoiesis                                 | 1.23E-04 | 9.88E-03 | 2.82<br>(17665,197,541,17)  |
| <a href="#">GO:0002250</a> | adaptive immune response                                           | 1.27E-04 | 1.01E-02 | 2.63<br>(17665,236,541,19)  |
| <a href="#">GO:0006954</a> | inflammatory response                                              | 1.27E-04 | 1.01E-02 | 2.12<br>(17665,447,541,29)  |
| <a href="#">GO:0042326</a> | negative regulation of phosphorylation                             | 1.39E-04 | 1.09E-02 | 2.14<br>(17665,427,541,28)  |
| <a href="#">GO:0070098</a> | chemokine-mediated signaling pathway                               | 1.44E-04 | 1.13E-02 | 4.13 (17665,79,541,10)      |
| <a href="#">GO:0043085</a> | positive regulation of catalytic activity                          | 1.45E-04 | 1.13E-02 | 1.56<br>(17665,1419,541,68) |
| <a href="#">GO:0031327</a> | negative regulation of cellular biosynthetic process               | 1.46E-04 | 1.13E-02 | 1.54<br>(17665,1526,541,72) |
| <a href="#">GO:0009890</a> | negative regulation of biosynthetic process                        | 1.46E-04 | 1.13E-02 | 1.53<br>(17665,1553,541,73) |
| <a href="#">GO:0046580</a> | negative regulation of Ras protein signal transduction             | 1.47E-04 | 1.13E-02 | 5.12 (17665,51,541,8)       |

|                            |                                                                                             |          |          |                              |
|----------------------------|---------------------------------------------------------------------------------------------|----------|----------|------------------------------|
| <a href="#">GO:0016032</a> | viral process                                                                               | 1.61E-04 | 1.23E-02 | 1.86<br>(17665,686,541,39)   |
| <a href="#">GO:0044403</a> | symbiont process                                                                            | 1.61E-04 | 1.23E-02 | 1.86<br>(17665,686,541,39)   |
| <a href="#">GO:0042026</a> | protein refolding                                                                           | 1.63E-04 | 1.24E-02 | 9.07 (17665,18,541,5)        |
| <a href="#">GO:0051240</a> | positive regulation of multicellular organismal process                                     | 1.80E-04 | 1.36E-02 | 1.50<br>(17665,1699,541,78)  |
| <a href="#">GO:0001933</a> | negative regulation of protein phosphorylation                                              | 1.91E-04 | 1.44E-02 | 2.17<br>(17665,391,541,26)   |
| <a href="#">GO:0040017</a> | positive regulation of locomotion                                                           | 2.01E-04 | 1.50E-02 | 1.96<br>(17665,551,541,33)   |
| <a href="#">GO:0045671</a> | negative regulation of osteoclast differentiation                                           | 2.09E-04 | 1.56E-02 | 6.76 (17665,29,541,6)        |
| <a href="#">GO:0051085</a> | chaperone cofactor-dependent protein refolding                                              | 2.09E-04 | 1.55E-02 | 6.76 (17665,29,541,6)        |
| <a href="#">GO:0045944</a> | positive regulation of transcription by RNA polymerase II                                   | 2.11E-04 | 1.56E-02 | 1.61<br>(17665,1174,541,58)  |
| <a href="#">GO:0002440</a> | production of molecular mediator of immune response                                         | 2.21E-04 | 1.62E-02 | 5.57 (17665,41,541,7)        |
| <a href="#">GO:0051345</a> | positive regulation of hydrolase activity                                                   | 2.30E-04 | 1.68E-02 | 1.79<br>(17665,747,541,41)   |
| <a href="#">GO:0043254</a> | regulation of protein complex assembly                                                      | 2.31E-04 | 1.68E-02 | 2.05<br>(17665,463,541,29)   |
| <a href="#">GO:0002699</a> | positive regulation of immune effector process                                              | 2.37E-04 | 1.71E-02 | 2.67<br>(17665,208,541,17)   |
| <a href="#">GO:2000106</a> | regulation of leukocyte apoptotic process                                                   | 2.41E-04 | 1.74E-02 | 3.89 (17665,84,541,10)       |
| <a href="#">GO:0070213</a> | protein auto-ADP-ribosylation                                                               | 2.42E-04 | 1.73E-02 | 11.87 (17665,11,541,4)       |
| <a href="#">GO:0032870</a> | cellular response to hormone stimulus                                                       | 2.47E-04 | 1.76E-02 | 2.26<br>(17665,332,541,23)   |
| <a href="#">GO:0043408</a> | regulation of MAPK cascade                                                                  | 2.56E-04 | 1.82E-02 | 1.81<br>(17665,702,541,39)   |
| <a href="#">GO:2000145</a> | regulation of cell motility                                                                 | 2.61E-04 | 1.85E-02 | 1.70<br>(17665,901,541,47)   |
| <a href="#">GO:1902106</a> | negative regulation of leukocyte differentiation                                            | 2.65E-04 | 1.86E-02 | 3.56<br>(17665,101,541,11)   |
| <a href="#">GO:0051130</a> | positive regulation of cellular component organization                                      | 2.72E-04 | 1.90E-02 | 1.58<br>(17665,1238,541,60)  |
| <a href="#">GO:0034155</a> | regulation of toll-like receptor 7 signaling pathway                                        | 2.73E-04 | 1.90E-02 | 19.59 (17665,5,541,3)        |
| <a href="#">GO:0001780</a> | neutrophil homeostasis                                                                      | 2.73E-04 | 1.89E-02 | 19.59 (17665,5,541,3)        |
| <a href="#">GO:0002433</a> | immune response-regulating cell surface receptor signaling pathway involved in phagocytosis | 2.74E-04 | 1.89E-02 | 4.20 (17665,70,541,9)        |
| <a href="#">GO:0038096</a> | Fc-gamma receptor signaling pathway involved in phagocytosis                                | 2.74E-04 | 1.88E-02 | 4.20 (17665,70,541,9)        |
| <a href="#">GO:0010629</a> | negative regulation of gene expression                                                      | 2.79E-04 | 1.91E-02 | 1.48<br>(17665,1723,541,78)  |
| <a href="#">GO:0016241</a> | regulation of macroautophagy                                                                | 2.88E-04 | 1.97E-02 | 2.83<br>(17665,173,541,15)   |
| <a href="#">GO:0044267</a> | cellular protein metabolic process                                                          | 2.97E-04 | 2.02E-02 | 1.32<br>(17665,3206,541,130) |
| <a href="#">GO:0070663</a> | regulation of leukocyte proliferation                                                       | 2.98E-04 | 2.01E-02 | 2.53<br>(17665,232,541,18)   |
| <a href="#">GO:0032480</a> | negative regulation of type I interferon production                                         | 3.01E-04 | 2.02E-02 | 5.32 (17665,43,541,7)        |
| <a href="#">GO:0045936</a> | negative regulation of phosphate metabolic process                                          | 3.01E-04 | 2.02E-02 | 1.93<br>(17665,540,541,32)   |
| <a href="#">GO:1901700</a> | response to oxygen-containing compound                                                      | 3.02E-04 | 2.02E-02 | 1.55<br>(17665,1349,541,64)  |
| <a href="#">GO:0050727</a> | regulation of inflammatory response                                                         | 3.06E-04 | 2.03E-02 | 2.11<br>(17665,403,541,26)   |
| <a href="#">GO:0010563</a> | negative regulation of phosphorus metabolic process                                         | 3.11E-04 | 2.06E-02 | 1.93<br>(17665,541,541,32)   |
| <a href="#">GO:0045055</a> | regulated exocytosis                                                                        | 3.19E-04 | 2.10E-02 | 1.83<br>(17665,661,541,37)   |
| <a href="#">GO:0050821</a> | protein stabilization                                                                       | 3.26E-04 | 2.14E-02 | 2.80<br>(17665,175,541,15)   |
| <a href="#">GO:0043412</a> | macromolecule modification                                                                  | 3.35E-04 | 2.19E-02 | 1.33<br>(17665,3098,541,126) |
| <a href="#">GO:0060326</a> | cell chemotaxis                                                                             | 3.42E-04 | 2.23E-02 | 2.68<br>(17665,195,541,16)   |
| <a href="#">GO:0061515</a> | myeloid cell development                                                                    | 3.48E-04 | 2.26E-02 | 5.19 (17665,44,541,7)        |



|                            |                                                                                        |          |          |                              |
|----------------------------|----------------------------------------------------------------------------------------|----------|----------|------------------------------|
| <a href="#">GO:0032944</a> | regulation of mononuclear cell proliferation                                           | 3.49E-04 | 2.25E-02 | 2.58<br>(17665,215,541,17)   |
| <a href="#">GO:0030154</a> | cell differentiation                                                                   | 3.57E-04 | 2.29E-02 | 1.45<br>(17665,1875,541,83)  |
| <a href="#">GO:0065008</a> | regulation of biological quality                                                       | 3.68E-04 | 2.35E-02 | 1.29<br>(17665,3636,541,144) |
| <a href="#">GO:0038094</a> | Fc-gamma receptor signaling pathway                                                    | 3.77E-04 | 2.40E-02 | 4.03 (17665,73,541,9)        |
| <a href="#">GO:0030335</a> | positive regulation of cell migration                                                  | 3.88E-04 | 2.46E-02 | 1.96<br>(17665,501,541,30)   |
| <a href="#">GO:0009409</a> | response to cold                                                                       | 4.02E-04 | 2.54E-02 | 5.08 (17665,45,541,7)        |
| <a href="#">GO:0030162</a> | regulation of proteolysis                                                              | 4.04E-04 | 2.54E-02 | 1.76<br>(17665,743,541,40)   |
| <a href="#">GO:0033673</a> | negative regulation of kinase activity                                                 | 4.06E-04 | 2.54E-02 | 2.47<br>(17665,238,541,18)   |
| <a href="#">GO:0048870</a> | cell motility                                                                          | 4.10E-04 | 2.56E-02 | 1.66<br>(17665,945,541,48)   |
| <a href="#">GO:0044419</a> | interspecies interaction between organisms                                             | 4.23E-04 | 2.63E-02 | 1.69<br>(17665,870,541,45)   |
| <a href="#">GO:0032652</a> | regulation of interleukin-1 production                                                 | 4.25E-04 | 2.63E-02 | 3.63 (17665,90,541,10)       |
| <a href="#">GO:0051084</a> | 'de novo' posttranslational protein folding                                            | 4.39E-04 | 2.71E-02 | 5.94 (17665,33,541,6)        |
| <a href="#">GO:0043901</a> | negative regulation of multi-organism process                                          | 4.42E-04 | 2.71E-02 | 2.84<br>(17665,161,541,14)   |
| <a href="#">GO:0051270</a> | regulation of cellular component movement                                              | 4.43E-04 | 2.71E-02 | 1.64<br>(17665,974,541,49)   |
| <a href="#">GO:0030225</a> | macrophage differentiation                                                             | 4.52E-04 | 2.75E-02 | 7.42 (17665,22,541,5)        |
| <a href="#">GO:0050687</a> | negative regulation of defense response to virus                                       | 4.52E-04 | 2.74E-02 | 7.42 (17665,22,541,5)        |
| <a href="#">GO:0048869</a> | cellular developmental process                                                         | 4.59E-04 | 2.78E-02 | 1.35<br>(17665,2714,541,112) |
| <a href="#">GO:0043407</a> | negative regulation of MAP kinase activity                                             | 4.62E-04 | 2.78E-02 | 3.92 (17665,75,541,9)        |
| <a href="#">GO:0016477</a> | cell migration                                                                         | 4.82E-04 | 2.89E-02 | 1.69<br>(17665,850,541,44)   |
| <a href="#">GO:0032270</a> | positive regulation of cellular protein metabolic process                              | 4.97E-04 | 2.97E-02 | 1.48<br>(17665,1564,541,71)  |
| <a href="#">GO:0043255</a> | regulation of carbohydrate biosynthetic process                                        | 5.07E-04 | 3.02E-02 | 3.55 (17665,92,541,10)       |
| <a href="#">GO:1901564</a> | organonitrogen compound metabolic process                                              | 5.12E-04 | 3.03E-02 | 1.23<br>(17665,4935,541,186) |
| <a href="#">GO:0032940</a> | secretion by cell                                                                      | 5.13E-04 | 3.03E-02 | 1.65<br>(17665,929,541,47)   |
| <a href="#">GO:0045089</a> | positive regulation of innate immune response                                          | 5.19E-04 | 3.05E-02 | 2.19<br>(17665,328,541,22)   |
| <a href="#">GO:2000516</a> | positive regulation of CD4-positive, alpha-beta T cell activation                      | 5.20E-04 | 3.05E-02 | 5.76 (17665,34,541,6)        |
| <a href="#">GO:0071495</a> | cellular response to endogenous stimulus                                               | 5.20E-04 | 3.04E-02 | 1.76<br>(17665,703,541,38)   |
| <a href="#">GO:0032648</a> | regulation of interferon-beta production                                               | 5.28E-04 | 3.07E-02 | 4.86 (17665,47,541,7)        |
| <a href="#">GO:0043370</a> | regulation of CD4-positive, alpha-beta T cell differentiation                          | 5.28E-04 | 3.06E-02 | 4.86 (17665,47,541,7)        |
| <a href="#">GO:0051247</a> | positive regulation of protein metabolic process                                       | 5.32E-04 | 3.07E-02 | 1.46<br>(17665,1650,541,74)  |
| <a href="#">GO:0070432</a> | regulation of nucleotide-binding oligomerization domain containing 2 signaling pathway | 5.33E-04 | 3.07E-02 | 16.33 (17665,6,541,3)        |
| <a href="#">GO:1903753</a> | negative regulation of p38MAPK cascade                                                 | 5.33E-04 | 3.06E-02 | 16.33 (17665,6,541,3)        |
| <a href="#">GO:0009597</a> | detection of virus                                                                     | 5.33E-04 | 3.05E-02 | 16.33 (17665,6,541,3)        |
| <a href="#">GO:1901701</a> | cellular response to oxygen-containing compound                                        | 5.36E-04 | 3.05E-02 | 1.69<br>(17665,829,541,43)   |
| <a href="#">GO:0043170</a> | macromolecule metabolic process                                                        | 5.40E-04 | 3.06E-02 | 1.21<br>(17665,5683,541,210) |
| <a href="#">GO:0051726</a> | regulation of cell cycle                                                               | 5.50E-04 | 3.11E-02 | 1.58<br>(17665,1140,541,55)  |
| <a href="#">GO:0097530</a> | granulocyte migration                                                                  | 5.53E-04 | 3.11E-02 | 3.51 (17665,93,541,10)       |
| <a href="#">GO:0002262</a> | myeloid cell homeostasis                                                               | 5.63E-04 | 3.16E-02 | 7.10 (17665,23,541,5)        |
| <a href="#">GO:0050860</a> | negative regulation of T cell receptor signaling pathway                               | 5.63E-04 | 3.15E-02 | 7.10 (17665,23,541,5)        |
| <a href="#">GO:0043409</a> | negative regulation of MAPK cascade                                                    | 5.66E-04 | 3.15E-02 | 2.77<br>(17665,165,541,14)   |

|                            |                                                                            |          |          |                              |
|----------------------------|----------------------------------------------------------------------------|----------|----------|------------------------------|
| <a href="#">GO:0061024</a> | membrane organization                                                      | 5.74E-04 | 3.19E-02 | 1.77<br>(17665,682,541,37)   |
| <a href="#">GO:0043550</a> | regulation of lipid kinase activity                                        | 5.80E-04 | 3.21E-02 | 4.21 (17665,62,541,8)        |
| <a href="#">GO:0045580</a> | regulation of T cell differentiation                                       | 5.96E-04 | 3.29E-02 | 2.89<br>(17665,147,541,13)   |
| <a href="#">GO:0051250</a> | negative regulation of lymphocyte activation                               | 5.96E-04 | 3.27E-02 | 2.89<br>(17665,147,541,13)   |
| <a href="#">GO:0051272</a> | positive regulation of cellular component movement                         | 5.97E-04 | 3.27E-02 | 1.88<br>(17665,538,541,31)   |
| <a href="#">GO:0010468</a> | regulation of gene expression                                              | 6.00E-04 | 3.27E-02 | 1.25<br>(17665,4369,541,167) |
| <a href="#">GO:0097191</a> | extrinsic apoptotic signaling pathway                                      | 6.02E-04 | 3.27E-02 | 3.47 (17665,94,541,10)       |
| <a href="#">GO:0002260</a> | lymphocyte homeostasis                                                     | 6.02E-04 | 3.26E-02 | 4.76 (17665,48,541,7)        |
| <a href="#">GO:1901699</a> | cellular response to nitrogen compound                                     | 6.10E-04 | 3.29E-02 | 1.95<br>(17665,468,541,28)   |
| <a href="#">GO:0045622</a> | regulation of T-helper cell differentiation                                | 6.11E-04 | 3.29E-02 | 5.60 (17665,35,541,6)        |
| <a href="#">GO:1901214</a> | regulation of neuron death                                                 | 6.32E-04 | 3.39E-02 | 2.20<br>(17665,311,541,21)   |
| <a href="#">GO:0097237</a> | cellular response to toxic substance                                       | 6.47E-04 | 3.45E-02 | 3.21<br>(17665,112,541,11)   |
| <a href="#">GO:0019219</a> | regulation of nucleobase-containing compound metabolic process             | 6.59E-04 | 3.51E-02 | 1.26<br>(17665,3954,541,153) |
| <a href="#">GO:0002762</a> | negative regulation of myeloid leukocyte differentiation                   | 6.84E-04 | 3.63E-02 | 4.66 (17665,49,541,7)        |
| <a href="#">GO:0001782</a> | B cell homeostasis                                                         | 6.93E-04 | 3.66E-02 | 6.80 (17665,24,541,5)        |
| <a href="#">GO:0031348</a> | negative regulation of defense response                                    | 6.96E-04 | 3.67E-02 | 2.51<br>(17665,208,541,16)   |
| <a href="#">GO:0006887</a> | exocytosis                                                                 | 6.98E-04 | 3.66E-02 | 1.72<br>(17665,739,541,39)   |
| <a href="#">GO:0002702</a> | positive regulation of production of molecular mediator of immune response | 7.11E-04 | 3.72E-02 | 3.40 (17665,96,541,10)       |
| <a href="#">GO:0019216</a> | regulation of lipid metabolic process                                      | 7.29E-04 | 3.80E-02 | 2.02<br>(17665,404,541,25)   |
| <a href="#">GO:0006457</a> | protein folding                                                            | 7.33E-04 | 3.81E-02 | 2.50<br>(17665,209,541,16)   |
| <a href="#">GO:0071214</a> | cellular response to abiotic stimulus                                      | 7.38E-04 | 3.82E-02 | 2.23<br>(17665,293,541,20)   |
| <a href="#">GO:0104004</a> | cellular response to environmental stimulus                                | 7.38E-04 | 3.81E-02 | 2.23<br>(17665,293,541,20)   |
| <a href="#">GO:0042542</a> | response to hydrogen peroxide                                              | 7.51E-04 | 3.86E-02 | 3.15<br>(17665,114,541,11)   |
| <a href="#">GO:2000116</a> | regulation of cysteine-type endopeptidase activity                         | 7.54E-04 | 3.86E-02 | 2.41<br>(17665,230,541,17)   |
| <a href="#">GO:0043069</a> | negative regulation of programmed cell death                               | 7.60E-04 | 3.88E-02 | 1.65<br>(17665,869,541,44)   |
| <a href="#">GO:0009612</a> | response to mechanical stimulus                                            | 7.76E-04 | 3.95E-02 | 2.58<br>(17665,190,541,15)   |
| <a href="#">GO:0051707</a> | response to other organism                                                 | 7.79E-04 | 3.96E-02 | 1.77<br>(17665,644,541,35)   |
| <a href="#">GO:2000147</a> | positive regulation of cell motility                                       | 7.83E-04 | 3.96E-02 | 1.87<br>(17665,523,541,30)   |
| <a href="#">GO:0044260</a> | cellular macromolecule metabolic process                                   | 8.04E-04 | 4.05E-02 | 1.24<br>(17665,4426,541,168) |
| <a href="#">GO:0071236</a> | cellular response to antibiotic                                            | 8.08E-04 | 4.06E-02 | 3.12<br>(17665,115,541,11)   |
| <a href="#">GO:2000113</a> | negative regulation of cellular macromolecule biosynthetic process         | 8.15E-04 | 4.08E-02 | 1.49<br>(17665,1401,541,64)  |
| <a href="#">GO:0050851</a> | antigen receptor-mediated signaling pathway                                | 8.19E-04 | 4.09E-02 | 2.56<br>(17665,191,541,15)   |
| <a href="#">GO:2001235</a> | positive regulation of apoptotic signaling pathway                         | 8.53E-04 | 4.25E-02 | 2.66<br>(17665,172,541,14)   |
| <a href="#">GO:0032946</a> | positive regulation of mononuclear cell proliferation                      | 8.57E-04 | 4.25E-02 | 2.92<br>(17665,134,541,12)   |
| <a href="#">GO:0010822</a> | positive regulation of mitochondrion organization                          | 8.68E-04 | 4.29E-02 | 3.10<br>(17665,116,541,11)   |
| <a href="#">GO:0045670</a> | regulation of osteoclast differentiation                                   | 8.86E-04 | 4.37E-02 | 3.96 (17665,66,541,8)        |
| <a href="#">GO:0009719</a> | response to endogenous stimulus                                            | 8.97E-04 | 4.41E-02 | 1.58<br>(17665,1032,541,50)  |

|                            |                                                                                              |          |          |                             |
|----------------------------|----------------------------------------------------------------------------------------------|----------|----------|-----------------------------|
| <a href="#">GO:0050670</a> | regulation of lymphocyte proliferation                                                       | 8.98E-04 | 4.40E-02 | 2.45<br>(17665,213,541,16)  |
| <a href="#">GO:2000345</a> | regulation of hepatocyte proliferation                                                       | 9.07E-04 | 4.43E-02 | 8.71 (17665,15,541,4)       |
| <a href="#">GO:0034097</a> | response to cytokine                                                                         | 9.09E-04 | 4.43E-02 | 1.83<br>(17665,552,541,31)  |
| <a href="#">GO:1901098</a> | positive regulation of autophagosome maturation                                              | 9.12E-04 | 4.43E-02 | 13.99 (17665,7,541,3)       |
| <a href="#">GO:0031349</a> | positive regulation of defense response                                                      | 9.15E-04 | 4.43E-02 | 1.93<br>(17665,457,541,27)  |
| <a href="#">GO:0010558</a> | negative regulation of macromolecule biosynthetic process                                    | 9.16E-04 | 4.42E-02 | 1.47<br>(17665,1462,541,66) |
| <a href="#">GO:0043066</a> | negative regulation of apoptotic process                                                     | 9.28E-04 | 4.46E-02 | 1.65<br>(17665,852,541,43)  |
| <a href="#">GO:0032621</a> | interleukin-18 production                                                                    | 9.36E-04 | 4.49E-02 | 32.65 (17665,2,541,2)       |
| <a href="#">GO:0010868</a> | negative regulation of triglyceride biosynthetic process                                     | 9.36E-04 | 4.47E-02 | 32.65 (17665,2,541,2)       |
| <a href="#">GO:0072110</a> | glomerular mesangial cell proliferation                                                      | 9.36E-04 | 4.46E-02 | 32.65 (17665,2,541,2)       |
| <a href="#">GO:1903378</a> | positive regulation of oxidative stress-induced neuron intrinsic apoptotic signaling pathway | 9.36E-04 | 4.45E-02 | 32.65 (17665,2,541,2)       |
| <a href="#">GO:0006914</a> | autophagy                                                                                    | 9.57E-04 | 4.53E-02 | 2.36<br>(17665,235,541,17)  |
| <a href="#">GO:0061919</a> | process utilizing autophagic mechanism                                                       | 9.57E-04 | 4.52E-02 | 2.36<br>(17665,235,541,17)  |
| <a href="#">GO:0060548</a> | negative regulation of cell death                                                            | 9.64E-04 | 4.54E-02 | 1.60<br>(17665,957,541,47)  |
| <a href="#">GO:0002718</a> | regulation of cytokine production involved in immune response                                | 9.74E-04 | 4.57E-02 | 3.54 (17665,83,541,9)       |
| <a href="#">GO:0040011</a> | locomotion                                                                                   | 9.75E-04 | 4.56E-02 | 1.58<br>(17665,1036,541,50) |
| <a href="#">GO:0045088</a> | regulation of innate immune response                                                         | 9.89E-04 | 4.61E-02 | 1.95<br>(17665,436,541,26)  |
