# Supplementary material for: 4-1BB co-stimulation further enhances anti-PD-1-mediated reinvigoration of exhausted CD39+ CD8 T cells from primary and metastatic sites of epithelial ovarian cancers
Source: PubMed Central journal article supplement — J Immunother Cancer. 2020 Dec 16;8(2):e001650. doi: 10.1136/jitc-2020-001650 (PMC7745695; doi:10.1136/jitc-2020-001650), 2020-12-16
Supplement: jitc-2020-001650supp009.pdf [file jitc-2020-001650supp009.pdf]

**Supplementary Table S8. Information about enrolled metastatic sites**

---

| <b>Variables</b>            |            |
|-----------------------------|------------|
| Samples with metastasis     | 15         |
| Overall metastatic lesions  | 22         |
| Metastatic lesions          |            |
| Omentum                     | 10 (45.5%) |
| Peritoneum                  | 3 (13.6%)  |
| Diaphragm                   | 2 (9.1%)   |
| Bladder                     | 1 (4.5%)   |
| Colon (Transverse, Sigmoid) | 3 (13.6%)  |
| Pelvic mass                 | 1 (4.5%)   |
| Cul-de-sac                  | 1 (4.5%)   |
| Spleen                      | 1 (4.5%)   |

---

Data are presented as number (%).

---
